# Supplementary material for: Facile access to boryltetralins and borylnaphthalenes via a cycloaddition using o-quinodimethanes
Source: Royal Society of Chemistry journal article supplement (doi:10.1039/c002949a), 2010-01-01

*Supplementary Information for*

**Facile access to boryltetralins and borylnaphthalenes via a cycloaddition  
using *o*-quinodimethanes**

*Hiroto Yoshida,\* Masashi Mukae and Joji Ohshita*

Department of Applied Chemistry, Graduate School of Engineering, Hiroshima University,  
Higashi-Hiroshima 739-8527, Japan

**Contents**

|                                                                      |            |
|----------------------------------------------------------------------|------------|
| <b>General Remarks</b>                                               | <b>S2</b>  |
| <b>Materials</b>                                                     | <b>S2</b>  |
| <b>Experimental Procedures and Characterization Data of Products</b> | <b>S3</b>  |
| <b>References</b>                                                    | <b>S16</b> |
| <b><sup>1</sup>H and <sup>13</sup>C NMR Spectra of New Compounds</b> |            |

### General remarks.

All manipulations of oxygen- and moisture-sensitive materials were conducted with a standard Schlenk technique under a purified argon atmosphere. Nuclear magnetic resonance spectra were taken on a JEOL EX-270 ( $^1\text{H}$ , 270 MHz;  $^{13}\text{C}$ , 67.8 MHz) spectrometer or a JEOL Lambda-400 ( $^1\text{H}$ , 400 MHz;  $^{13}\text{C}$ , 99.5 MHz) spectrometer using residual chloroform ( $^1\text{H}$ ,  $\delta = 7.26$ ), or  $\text{CDCl}_3$  ( $^{13}\text{C}$ ,  $\delta = 77.0$ ) as an internal standard.  $^1\text{H}$  NMR data are reported as follows: chemical shift, multiplicity (s = singlet, d = doublet, t = triplet, quint = quintet, sext = sextet, br = broad, m = multiplet), coupling constants (Hz), integration. High-resolution mass spectra were obtained with a JEOL JMS-SX102A spectrometer. Preparative recycling gel permeation chromatography was performed with GL Science PU 614 equipped with Shodex GPC H-2001L and -2002L columns (chloroform or toluene as an eluent). Unless otherwise noted, commercially available reagents were used without purification. 18-Crown-6 was recrystallized from distilled MeCN. KF (spray-dried) was vacuum dried at 100 °C for 12 h. Dioxane was distilled from sodium/benzophenone ketyl. MeCN was distilled from phosphorus pentoxide.

### Materials.

*o*-Quinodimethane precursors (**1a–1e**)<sup>1</sup> and borylalkenes (**2a–2l**)<sup>2</sup> were prepared according to literature procedures. Other borylalkenes (**2m** and **2n**) were purchased from Aldrich.

**[4+2] Cycloaddition between *o*-QDMs and borylalkenes: a general procedure.**

A dioxane solution (1 mL) of **1** (0.30 mmol), **2** (0.20 mmol), 18-crown-6 (0.33 mmol) and KF (0.33 mmol) was stirred at 100 °C for the period as specified in Table 1, Scheme 4 and eqn. 1. The mixture was diluted with ethyl acetate and washed with cold brine. The organic layer was dried over MgSO<sub>4</sub> and concentrated in vacuo. Preparative recycling gel permeation chromatography (chloroform as an eluent) gave the corresponding product.

**4,4,5,5-Tetramethyl-2-(3-phenyl-1,2,3,4-tetrahydro-naphthalen-2-yl)-[1,3,2]dioxaborolane (3aa)**

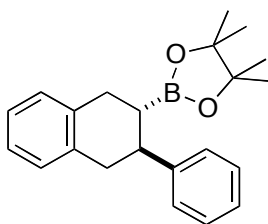

A pale yellow solid: <sup>1</sup>H NMR (CDCl<sub>3</sub>): δ 0.97 (s, 6H, CH<sub>3</sub>), 0.99 (s, 6H, CH<sub>3</sub>), 1.74 (td, *J* = 10.9, 6.3 Hz, 1H, BCH), 2.88-3.06 (m, 5H, ArCH<sub>2</sub> and ArCH), 7.06-7.13 (m, 4H, ArH), 7.16-7.24 (m, 1H, ArH), 7.29-7.31 (m, 4H, ArH); <sup>13</sup>C NMR (CDCl<sub>3</sub>): δ 24.35, 24.43, 31.6, 39.1, 42.9, 76.5, 125.4, 125.6, 126.2, 127.6, 128.2, 128.6, 128.9, 136.4, 136.8, 146.4.

**4,4,5,5-Tetramethyl-2-[3-(1-naphthyl)-1,2,3,4-tetrahydro-naphthalen-2-yl]-[1,3,2]dioxaborolane (3ab)**

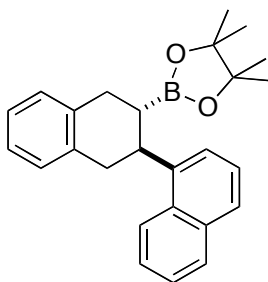

A yellow solid: <sup>1</sup>H NMR (CDCl<sub>3</sub>): δ 0.74 (s, 6H, CH<sub>3</sub>), 0.86 (s, 6H, CH<sub>3</sub>), 1.97 (td, *J* = 11.5, 5.3 Hz, 1H, BCH), 1.91-2.02 (m, 4H, ArCH<sub>2</sub>), 3.93 (td, *J* = 11.2, 4.6 Hz, 1H, ArCH), 7.03-7.17 (m, 4H, ArH), 7.41-7.52 (m, 4H, ArH), 7.70 (dd, *J* = 6.9, 2.3 Hz, 1H, ArH), 7.84 (dd, *J* = 6.3, 2.6 Hz, 1H, ArH), 8.23 (dd, *J* = 8.2, 2.0 Hz, 1H, ArH); <sup>13</sup>C NMR (CDCl<sub>3</sub>): δ 24.19, 24.21, 29.7, 31.8, 39.0, 82.9, 123.6, 125.3, 125.5, 125.56, 125.59, 125.7, 126.5, 128.65, 128.70, 128.9, 131.7, 133.8, 136.5, 136.9, 143.0.

**4,4,5,5-Tetramethyl-2-[3-(biphenyl-4-yl)-1,2,3,4-tetrahydro-naphthalen-2-yl]-[1,3,2]dioxaborolane (3ac)**

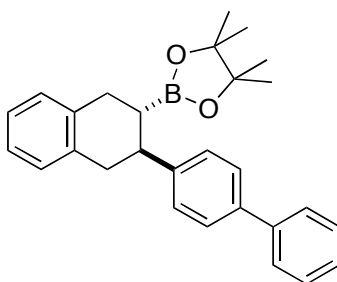

A white solid:  $^1\text{H}$  NMR ( $\text{CDCl}_3$ ):  $\delta$  0.98 (s, 6H,  $\text{CH}_3$ ), 1.02 (s, 6H,  $\text{CH}_3$ ), 1.76 (td,  $J = 10.9$ , 6.3 Hz, 1H, BCh), 2.94-3.12 (m, 5H,  $\text{ArCH}_2$  and  $\text{ArCH}$ ), 7.12-7.16 (m 4H,  $\text{ArH}$ ), 7.33-7.57 (m, 9H,  $\text{ArH}$ );  $^{13}\text{C}$  NMR ( $\text{CDCl}_3$ ):  $\delta$  24.3, 24.4, 31.6, 39.0, 42.5, 83.0, 125.5, 125.6, 127.0, 128.1, 128.6, 128.7, 129.0, 136.4, 136.7, 139.2, 141.2, 145.6.

**4,4,5,5-Tetramethyl-2-[3-(4-*n*-butylphenyl)-1,2,3,4-tetrahydro-naphthalen-2-yl]-[1,3,2]dioxaborolane (3ad)**

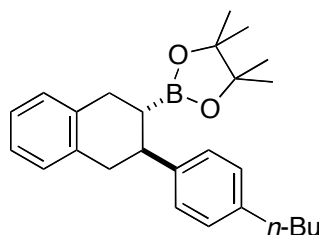

A pale yellow oil:  $^1\text{H}$  NMR ( $\text{CDCl}_3$ ):  $\delta$  0.93 (t,  $J = 6.8$  Hz, 3H,  $\text{CH}_3\text{CH}_2$ ), 0.96 (s, 6H,  $\text{CH}_3$ ), 1.00 (s, 6H,  $\text{CH}_3$ ), 1.35 (sext,  $J = 7.8$  Hz, 2H,  $\text{CH}_2$ ), 1.57 (quint,  $J = 7.7$  Hz, 2H,  $\text{CH}_2$ ), 1.71 (td,  $J = 11.6$ , 5.8 Hz, 1H, BCh), 2.59 (t,  $J = 7.7$  Hz, 2H,  $\text{ArCH}_2\text{CH}_2$ ), 2.90-3.03 (m, 5H,  $\text{ArCH}_2$  and  $\text{ArCH}$ ), 7.06-7.13 (m, 6H,  $\text{ArH}$ ), 7.21 (d,  $J = 8.7$  Hz, 2H,  $\text{ArH}$ );  $^{13}\text{C}$  NMR ( $\text{CDCl}_3$ ):  $\delta$  13.9, 22.2, 24.3, 24.4, 31.7, 33.8, 35.2, 39.1, 42.5, 82.9, 125.4, 125.5, 127.5, 128.3, 128.6, 129.0, 136.4, 136.9, 140.7, 143.5.

**4,4,5,5-Tetramethyl-2-[3-(2,5-dimethoxyphenyl)-1,2,3,4-tetrahydro-naphthalen-2-yl]-[1,3,2]dioxaborolane (3ae)**

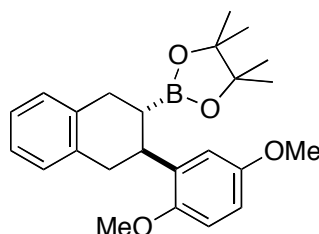

A yellow oil:  $^1\text{H}$  NMR ( $\text{CDCl}_3$ ):  $\delta$  0.99 (s, 6H,  $\text{CH}_3$ ), 1.02 (s, 6H,  $\text{CH}_3$ ), 1.83 (td,  $J = 11.2$ , 5.6 Hz, 1H, BCh), 2.77-3.06 (m, 4H,  $\text{ArCH}_2$ ), 3.46 (td,  $J = 11.5$ , 4.9 Hz, 1H,  $\text{ArCH}$ ), 3.77 (s, 3H,  $\text{OCH}_3$ ), 3.79 (s, 3H,  $\text{OCH}_3$ ), 6.68-6.84 (m, 3H,  $\text{ArH}$ ), 7.07-7.11 (m 4H,  $\text{ArH}$ );  $^{13}\text{C}$

NMR (CDCl<sub>3</sub>):  $\delta$  24.3, 24.4, 31.7, 36.0, 53.5, 55.7, 56.4, 82.8, 111.5, 112.1, 114.0, 125.3, 125.4, 128.6, 128.9, 136.1, 136.5, 137.1, 151.6, 153.7.

**4,4,5,5-Tetramethyl-2-[3-(4-trifluoromethylphenyl)-1,2,3,4-tetrahydro-naphthalen-2-yl]-[1,3,2]dioxaborolane (3af)**

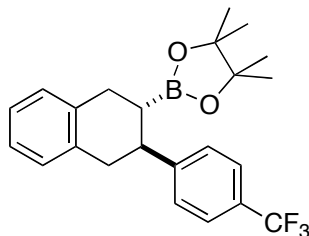

A white solid: <sup>1</sup>H NMR (CDCl<sub>3</sub>):  $\delta$  0.98 (s, 6H, CH<sub>3</sub>), 1.00 (s, 6H, CH<sub>3</sub>), 1.73 (td,  $J$  = 10.9, 6.6 Hz, 1H, BCH), 2.83-3.15 (m, 5H, ArCH<sub>2</sub> and ArCH), 7.05-7.14 (m, 4H, ArH), 7.41 (d,  $J$  = 8.4 Hz, 2H, ArH), 7.57 (d,  $J$  = 8.4 Hz, 2H, ArH); <sup>13</sup>C NMR (CDCl<sub>3</sub>):  $\delta$  24.30, 24.34, 31.4, 38.7, 42.8, 83.1, 125.06, 125.11, 125.17, 125.22, 125.6, 125.8, 128.0, 128.3, 128.6, 128.9, 136.1, 136.2, 150.66, 150.68.

**4,4,5,5-Tetramethyl-2-[3-(4-bromophenyl)-1,2,3,4-tetrahydro-naphthalen-2-yl]-[1,3,2]dioxaborolane (3ag)**

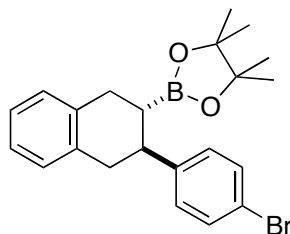

A white solid: <sup>1</sup>H NMR (CDCl<sub>3</sub>):  $\delta$  1.01 (s, 6H, CH<sub>3</sub>), 1.02 (s, 6H, CH<sub>3</sub>), 1.65-1.72 (m, 1H, BCH), 2.79-3.01 (m, 5H, ArCH<sub>2</sub> and ArCH), 7.06-7.13 (m, 4H, ArH), 7.18 (d,  $J$  = 8.7 Hz, 2H, ArH), 7.43 (d,  $J$  = 7.7 Hz, 2H, ArH); <sup>13</sup>C NMR (CDCl<sub>3</sub>):  $\delta$  24.39, 24.41, 31.4, 38.9, 42.3, 83.0, 119.8, 125.5, 125.7, 128.6, 128.9, 129.4, 131.2, 136.2, 136.3.

**4,4,5,5-Tetramethyl-2-[3-(4-ethynylphenyl)-1,2,3,4-tetrahydro-naphthalen-2-yl]-[1,3,2]dioxaborolane (3ah)**

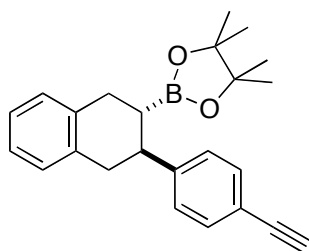

A white solid:  $^1\text{H}$  NMR ( $\text{CDCl}_3$ ):  $\delta$  1.00 (s, 6H,  $\text{CH}_3$ ), 1.01 (s, 6H,  $\text{CH}_3$ ), 1.71 (td,  $J = 11.6$ , 6.8 Hz, 1H, B $\text{CH}$ ), 2.85-3.06 (m, 6H,  $\text{CH}$ ,  $\text{ArCH}_2$  and  $\text{ArCH}$ ), 7.07-7.13 (m, 4H,  $\text{ArH}$ ), 7.26 (d,  $J = 7.8$  Hz, 2H,  $\text{ArH}$ ), 7.45 (d,  $J = 7.8$  Hz, 2H,  $\text{ArH}$ );  $^{13}\text{C}$  NMR ( $\text{CDCl}_3$ ):  $\delta$  24.39, 24.40, 31.4, 38.8, 42.7, 76.5, 83.0, 83.9, 119.8, 125.5, 125.7, 127.6, 128.6, 128.9, 132.0, 136.2, 136.4, 147.5.

**4,4,5,5-Tetramethyl-2-[3-(1-octynylphenyl)-1,2,3,4-tetrahydro-naphthalen-2-yl]-[1,3,2]dioxaborolane (3ai)**

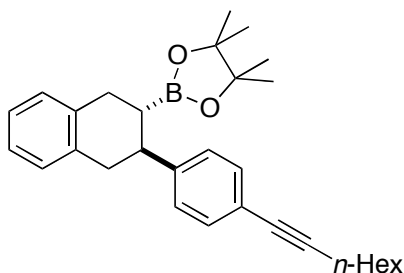

A pale yellow oil:  $^1\text{H}$  NMR ( $\text{CDCl}_3$ ):  $\delta$  0.92 (t,  $J = 6.7$  Hz, 3H,  $\text{CH}_3\text{CH}_2$ ), 1.00 (s, 6H,  $\text{CH}_3$ ), 1.01 (s, 6H,  $\text{CH}_3$ ), 1.34-1.71 (m, 9H, B $\text{CH}$  and  $\text{CH}_2$ ), 2.41 (t,  $J = 6.7$  Hz, 2H,  $\text{C}\equiv\text{CCH}_2$ ), 2.80-3.00 (m, 5H,  $\text{ArCH}_2$  and  $\text{ArCH}$ ), 7.06-7.12 (m, 4H,  $\text{ArH}$ ), 7.21 (d,  $J = 7.7$  Hz, 2H,  $\text{ArH}$ ), 7.34 (d,  $J = 7.7$  Hz, 2H,  $\text{ArH}$ );  $^{13}\text{C}$  NMR ( $\text{CDCl}_3$ ):  $\delta$  14.0, 19.4, 22.5, 24.4, 25.1, 28.6, 28.8, 31.3, 31.5, 38.9, 42.6, 80.7, 83.0, 89.6, 121.8, 125.5, 125.6, 127.5, 128.5, 128.9, 131.4, 136.3, 136.5, 146.0.

**4,4,5,5-Tetramethyl-2-[3-(2-thienyl)-1,2,3,4-tetrahydro-naphthalen-2-yl]-[1,3,2]dioxaborolane (3aj)**

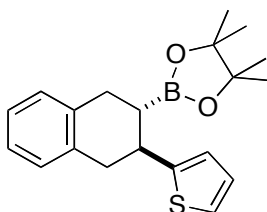

A colorless oil:  $^1\text{H}$  NMR ( $\text{CDCl}_3$ ):  $\delta$  1.07 (s, 6H,  $\text{CH}_3$ ), 1.09 (s, 6H,  $\text{CH}_3$ ), 1.70 (td,  $J = 11.1$ , 6.1 Hz, 1H, B $\text{CH}$ ), 2.89-3.02 (m, 3H,  $\text{ArCH}_2$ ), 3.14 (dd,  $J = 16.4$ , 5.1 Hz, 1H,  $\text{ArCH}_2$ ), 3.38 (td,  $J = 11.1$ , 5.1 Hz, 1H, (thiophene) $\text{CH}$ ), 6.91-6.93 (m, 2H,  $\text{ArH}$ ), 7.06-7.14 (m, 5H,  $\text{ArH}$ );  $^{13}\text{C}$  NMR ( $\text{CDCl}_3$ ):  $\delta$  24.4, 24.5, 31.2, 37.7, 39.5, 83.1, 122.6, 123.4, 125.5, 125.7, 126.3, 128.5, 128.8, 136.0, 136.1, 150.3.

**4,4,5,5-Tetramethyl-2-[3-((tetrahydro-2H-pyran-2-yloxy)methyl)-1,2,3,4-tetrahydro-naphthalen-2-yl]-[1,3,2]dioxaborolane (3ak)**

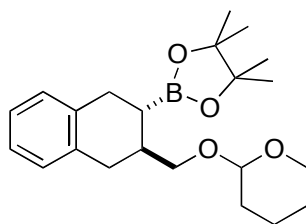

A pale yellow oil:  $^1\text{H}$  NMR ( $\text{CDCl}_3$ ):  $\delta$  1.20-1.29 (m, 2H,  $\text{CH}_2$ ), 1.24 (s, 12H,  $\text{CH}_3$ ), 1.52-1.85 (m, 6H,  $\text{BCH}$  and  $\text{CH}_2$ ), 2.15-2.27 (m, 1H,  $\text{CHCH}_2\text{O}$ ), 2.62-2.68 (m, 1H,  $\text{ArCH}_2$ ), 2.80-2.83 (m, 2H,  $\text{ArCH}_2$ ), 2.98 (td,  $J = 16.4, 5.8$  Hz, 1H,  $\text{ArCH}_2$ ), 3.31 (dd,  $J = 9.8, 7.2$  Hz, 1H,  $\text{OCH}_2$ ), 3.49 (dd,  $J = 9.7, 4.9$  Hz, 1H,  $\text{OCH}_2$ ), 3.62 (t,  $J = 9.7$  Hz, 1H,  $\text{OCH}_2$ ), 3.81-3.89 (m, 1H,  $\text{OCH}_2$ ), 4.61 (dt,  $J = 10.6, 3.8$  Hz, 1H,  $\text{OCHO}$ ), 7.07 (brs, 4H,  $\text{ArH}$ );  $^{13}\text{C}$  NMR ( $\text{CDCl}_3$ ):  $\delta$  19.4, 20.8, 24.6, 24.71, 24.74, 24.8, 25.5, 30.20, 30.24, 30.3, 30.6, 30.65, 32.70, 32.9, 33.1, 33.2, 35.1, 35.2, 35.4, 35.5, 61.5, 61.8, 71.6, 71.9, 83.08, 83.12, 97.7, 98.25, 98.33, 99.1, 99.7, 124.5, 125.2, 125.5, 128.0, 128.1, 128.3, 128.8, 129.1, 136.5, 136.6, 137.0, 137.1.

**4,4,5,5-Tetramethyl-2-(3-*n*-hexyl-1,2,3,4-tetrahydro-naphthalen-2-yl)-[1,3,2]dioxaborolane (3al)**

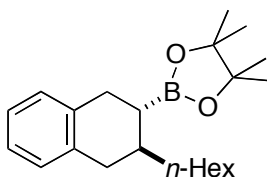

A colorless oil:  $^1\text{H}$  NMR ( $\text{CDCl}_3$ ):  $\delta$  0.89 (t,  $J = 6.8$ , 3H,  $\text{CH}_3\text{CH}_2$ ), 1.13-1.51 (m, 23H,  $\text{CH}_3$ ,  $\text{CH}_2$  and  $\text{CH}$ ), 1.83-1.92 (m, 1H,  $\text{BCH}$ ), 2.39 (dd,  $J = 16.4, 9.7$  Hz, 1H,  $\text{ArCH}_2$ ), 2.79-2.82 (m, 2H,  $\text{ArCH}_2$ ), 2.90 (dd,  $J = 16.4, 4.8$  Hz, 1H,  $\text{ArCH}_2$ ), 7.06 (brs, 4H,  $\text{ArH}$ );  $^{13}\text{C}$  NMR ( $\text{CDCl}_3$ ):  $\delta$  14.1, 22.7, 24.7, 24.8, 26.5, 29.5, 30.8, 31.8, 34.9, 35.0, 36.4, 83.0, 125.2, 125.3, 128.2, 128.9, 136.9, 137.1.

**4,4,5,5-Tetramethyl-2-(3-cyclopropyl-1,2,3,4-tetrahydro-naphthalen-2-yl)-[1,3,2]dioxaborolane (3am)**

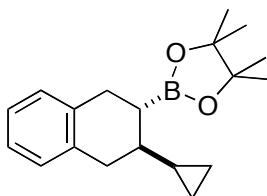

A pale yellow oil:  $^1\text{H}$  NMR ( $\text{CDCl}_3$ ):  $\delta$  0.13-0.18 (m, 1H), 0.29-0.38 (m, 1H), 0.42-0.50 (m, 2H), 0.65-0.74 (m, 1H), 1.01-1.23 (m 1H), 1.24-1.38 (m, 1H,  $\text{BCH}$ ), 1.29 (s, 12H,  $\text{CH}_3$ ), 2.60 (dd,  $J = 16.4, 10.6$  Hz, 1H,  $\text{ArCH}_2$ ), 2.82 (d, 7.7 Hz, 2H,  $\text{ArCH}_2$ ), 2.90 (dd,  $J =$

16.4, 4.8 Hz, 1H, ArCH<sub>2</sub>), 7.07 (brs, 4H, ArH); <sup>13</sup>C NMR (CDCl<sub>3</sub>): δ 3.4, 5.3, 17.3, 24.8, 25.1, 31.2, 36.2, 40.9, 83.0, 125.3, 128.3, 128.9, 136.8, 136.9.

**A mixture of 2-(3,4-diphenyl-1,2,3,4-tetrahydronaphthalen-2-yl)-4,4,5,5-tetramethyl-1,3,2-dioxaborolane (3ba) and 2-(1,3-diphenyl-1,2,3,4-tetrahydronaphthalen-2-yl)-4,4,5,5-tetramethyl-1,3,2-dioxaborolane (3'ba) (3ba:3'ba = 93:7)**

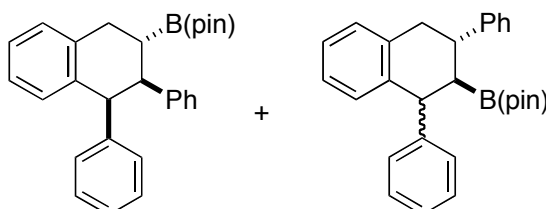

A yellow solid: <sup>1</sup>H NMR (CDCl<sub>3</sub>): δ 0.67-0.97 (m, CH<sub>3</sub>), 1.99-2.11 (m, BCH), 3.00-3.09 (m, ArCH<sub>2</sub>), 3.47 (dd, *J* = 12.5, 4.8 Hz, PhCH), 4.07-4.27 (m, ArCHPh), 6.47 (d, *J* = 6.8 Hz, ArH), 6.71-7.36 (m, ArH); <sup>13</sup>C NMR (CDCl<sub>3</sub>): δ 24.08, 24.11, 24.15, 24.23, 24.3, 31.4, 32.3, 40.2, 43.9, 47.0, 51.3, 51.9, 55.0, 82.8, 82.88, 82.92, 125.6, 125.7, 125.9, 126.0, 126.1, 126.5, 126.9, 127.3, 127.71, 127.73, 128.2, 128.3, 128.4, 129.0, 129.4, 129.5, 130.3, 130.7, 130.8, 136.4, 136.8, 137.1, 139.6, 140.3, 140.4, 142.5, 143.5, 144.2, 145.4, 145.5.

**A mixture of 4,4,5,5-tetramethyl-2-(2-phenyl-1,2,3,4-tetrahydro-1,1'-binaphthyl-3-yl)-1,3,2-dioxaborolane (3ca) and 4,4,5,5-tetramethyl-2-(3-phenyl-1,2,3,4-tetrahydro-1,1'-binaphthyl-2-yl)-1,3,2-dioxaborolane (3'ca) (3ca:3'ca = 89:11)**

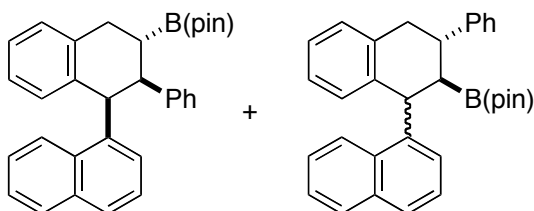

A pale yellow oil: <sup>1</sup>H NMR (CDCl<sub>3</sub>): δ 0.84-0.97 (m, CH<sub>3</sub>), 2.13-2.33 (m, BCH), 3.21 (d, *J* = 8.77 Hz, ArCH<sub>2</sub>), 3.64 (dd, *J* = 12.6, 5.8 Hz, PhCH), 5.33 (d, *J* = 5.8 Hz, ArCHAr), 6.57-7.78 (m, ArH); <sup>13</sup>C NMR (CDCl<sub>3</sub>): δ 17.6, 24.0, 24.07, 24.14, 24.2, 24.26, 24.33, 24.4, 31.4, 32.3, 44.0, 44.1, 44.3, 47.3, 82.7, 82.8, 82.9, 123.5, 124.3, 124.56, 124.61, 124.63, 125.1, 125.5, 125.8, 125.9, 126.0, 126.4, 126.5, 127.0, 127.6, 127.7, 127.8, 127.9, 128.3, 128.5, 128.9, 129.5, 129.6, 130.8, 132.7, 133.2, 136.6, 139.6, 140.7, 143.0, 145.5.

**A mixture of 2-(3,8-diphenyl-1,2,3,4-tetrahydronaphthalen-2-yl)-4,4,5,5-tetramethyl-1,3,2-dioxaborolane (3da) and 2-(3,5-diphenyl-1,2,3,4-tetrahydronaphthalen-2-yl)-4,4,5,5-tetramethyl-1,3,2-dioxaborolane (3'da) (3da:3'da = 68:32)**



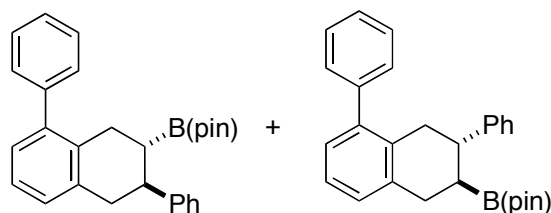

A yellow oil:  $^1\text{H}$  NMR ( $\text{CDCl}_3$ ):  $\delta$  0.92-0.94 (m,  $\text{CH}_3$ ), 0.98-1.01 (m,  $\text{CH}_3$ ), 1.64 (td,  $J$  = 11.6, 3.8 Hz, BCH), 1.78 (td,  $J$  = 10.6, 6.7 Hz, BCH), 2.71-3.18 (m,  $\text{ArCH}_2$  and  $\text{PhCH}$ ), 7.07-7.46 (m,  $\text{ArH}$ );  $^{13}\text{C}$  NMR ( $\text{CDCl}_3$ ):  $\delta$  24.31, 24.34, 24.4, 30.2, 32.3, 37.7, 39.7, 42.7, 43.3, 77.2, 82.88, 82.89, 125.28, 125.33, 126.1, 126.2, 126.6, 126.7, 127.3, 127.4, 127.6, 127.7, 127.8, 127.88, 127.94, 128.0, 128.1, 128.2, 128.3, 129.1, 129.2, 134.0, 134.3, 136.7, 137.2, 141.7, 141.8, 141.9, 142.1, 146.4.

**A mixture of 4,4,5,5-tetramethyl-2-(3-phenyl-1,2,3,4-tetrahydrophenanthren-2-yl)-1,3,2-dioxaborolane (3ea) and 4,4,5,5-tetramethyl-2-(2-phenyl-1,2,3,4-tetrahydrophenanthren-3-yl)-1,3,2-dioxaborolane (3'ea) (3ea:3'ea = 50:50)**

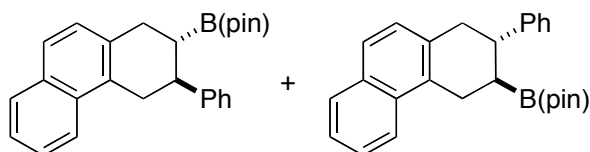

A yellow oil:  $^1\text{H}$  NMR ( $\text{CDCl}_3$ ):  $\delta$  0.98-1.02 (m,  $\text{CH}_3$ ), 1.82 (td,  $J$  = 11.6, 4.8 Hz, BCH), 3.01-3.20 (m), 3.43 (dd,  $J$  = 17.4, 4.8 Hz), 3.54 (dd,  $J$  = 15.5, 2.9 Hz), 7.18-7.51 (m,  $\text{ArH}$ ), 7.63 (d,  $J$  = 3.9 Hz,  $\text{ArH}$ ), 7.65 (d,  $J$  = 2.9 Hz,  $\text{ArH}$ ), 7.79-7.82 (m,  $\text{ArH}$ ), 7.89 (d,  $J$  = 7.7 Hz,  $\text{ArH}$ ), 8.01 (d,  $J$  = 8.7 Hz,  $\text{ArH}$ );  $^{13}\text{C}$  NMR ( $\text{CDCl}_3$ ):  $\delta$  24.37, 24.43, 24.5, 28.0, 32.6, 35.7, 40.0, 42.5, 43.0, 82.99, 83.03, 122.7, 123.0, 124.7, 125.7, 125.79, 125.82, 126.27, 126.32, 127.66, 127.71, 127.8, 128.0, 128.25, 128.33, 128.36, 128.38, 130.9, 131.2, 132.0, 132.1, 132.2, 132.3, 133.8, 134.1, 146.3, 146.6.

**A mixture of *anti*- and *syn*-4,4,5,5-tetramethyl-2-(4-phenyl-1,2,3,4-tetrahydronaphthalen-2-yl)-1,3,2-dioxaborolane (3bo) (*anti*:*syn* = 62:38)**

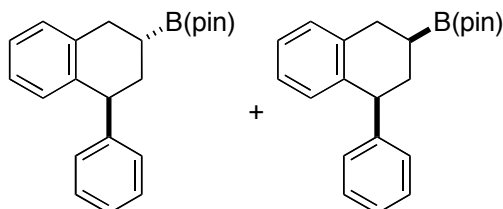

A colorless oil:  $^1\text{H}$  NMR ( $\text{CDCl}_3$ ):  $\delta$  1.21 (s,  $\text{CH}_3$ ), 1.22 (s,  $\text{CH}_3$ ), 1.43-1.58 (m), 1.70-2.31 (m), 2.80-3.00 (m,  $\text{ArCH}_2$ ), 4.05 (dd,  $J$  = 11.9, 4.0 Hz,  $\text{ArCHPh}$ ), 4.25 (dd,  $J$  = 5.8, 2.9 Hz,  $\text{ArCHPh}$ ), 6.77-7.31 (m,  $\text{ArH}$ );  $^{13}\text{C}$  NMR ( $\text{CDCl}_3$ ):  $\delta$  24.67, 24.74, 24.8, 30.6, 31.4, 33.2,

36.1, 44.0, 47.6, 83.1, 83.2, 125.48, 125.54, 125.6, 125.9, 126.0, 128.0, 128.3, 128.6, 128.76, 128.83, 129.0, 129.8, 130.6, 137.8, 138.0, 138.4, 140.0, 147.4, 147.7.

**A mixture of *anti*- and *syn*-4,4,5,5-tetramethyl-2-(1-phenyl-1,2,3,4-tetrahydronaphthalen-2-yl)-1,3,2-dioxaborolane (3'bo) (*anti*:*syn* = 84:16)**

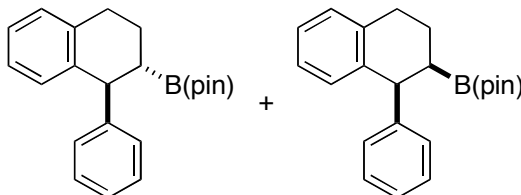

A colorless oil:  $^1\text{H}$  NMR ( $\text{CDCl}_3$ ):  $\delta$  1.02-1.12 (m,  $\text{CH}_3$ ), 1.58 (td,  $J = 10.6, 2.9$  Hz,  $\text{BCH}$ ), 1.79-1.87 (m,  $\text{CH}_2$ ), 1.96-2.02 (m,  $\text{CH}_2$ ), 2.88-2.95 (m,  $\text{ArCH}_2$ ), 4.16 (d,  $J = 10.6$  Hz,  $\text{ArCHPh}$ ), 4.41 (d,  $J = 4.0$  Hz,  $\text{ArCHPh}$ ), 6.75 (d,  $J = 7.8$  Hz,  $\text{ArH}$ ), 6.93-7.27 (m,  $\text{ArH}$ );  $^{13}\text{C}$  NMR ( $\text{CDCl}_3$ ):  $\delta$  14.1, 19.1, 23.0, 23.5, 24.0, 24.5, 24.6, 24.7, 25.1, 25.8, 29.6, 30.0, 37.7, 45.1, 47.3, 83.0, 83.1, 121.3, 125.4, 125.5, 125.6, 125.7, 125.86, 125.91, 127.6, 128.1, 128.8, 129.0, 129.3, 129.7, 129.9, 137.15, 137.19, 140.5, 147.0.

#### **Aromatization of boryltetralins: a general procedure.**

**Method A:** A benzene (6 mL) solution of **3** (0.10 mmol), NBS (0.50 mmol), sodium methoxide (0.30 mmol) and AIBN (5.0  $\mu\text{mol}$ ) was stirred at reflux temperature in the dark for the period as specified in Schemes 3 and 4. The mixture was diluted with hexane before filtration with Celite pad. Preparative recycling gel permeation chromatography (chloroform as an eluent) gave the corresponding product.

**Method B:** A toluene (0.5 mL) solution of **3** (0.10 mmol) and DDQ (0.25 mmol) was stirred at 100  $^\circ\text{C}$  for the period as specified in Scheme 3. The mixture was diluted with benzene before filtration with Celite pad. Preparative recycling gel permeation chromatography (chloroform as an eluent) gave the corresponding product.

#### **4,4,5,5-Tetramethyl-2-(3-phenyl-naphthalen-2-yl)-[1,3,2]dioxaborolane (4aa)**

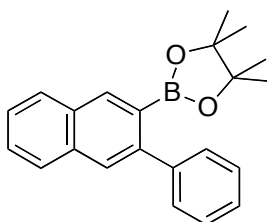

A yellow oil:  $^1\text{H}$  NMR ( $\text{CDCl}_3$ ):  $\delta$  1.26 (s, 12H,  $\text{CH}_3$ ), 7.37-7.53 (m, 7H, ArH), 7.83-7.92 (m, 3H, ArH), 8.29 (s, 1H, ArH);  $^{13}\text{C}$  NMR ( $\text{CDCl}_3$ ):  $\delta$  23.7, 83.8, 125.8, 126.8, 127.1, 127.5, 127.8, 128.1, 129.3, 131.6, 134.2, 135.8, 143.1, 143.6; HRMS Calcd for  $\text{C}_{22}\text{H}_{23}\text{BO}_2$ :  $\text{M}^+$ , 330.1791. Found:  $m/z$  330.1776.

**4,4,5,5-Tetramethyl-2-[3-(1-naphthyl)-naphthalen-2-yl]-[1,3,2]dioxaborolane (4ab)**

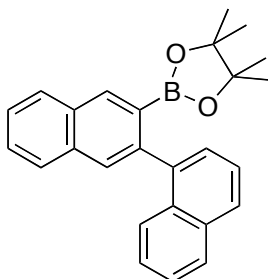

A pale yellow oil:  $^1\text{H}$  NMR ( $\text{CDCl}_3$ ):  $\delta$  0.69 (s, 6H,  $\text{CH}_3$ ), 0.97 (s, 6H,  $\text{CH}_3$ ), 7.34 (t,  $J = 6.8$  Hz, 1H, ArH), 7.44 (t,  $J = 6.8$  Hz, 1H, ArH), 7.51-7.61 (m, 5H, ArH), 7.79-7.90 (m, 4H, ArH), 7.97 (d,  $J = 7.7$  Hz, 1H, ArH), 8.37 (s, 1H, ArH);  $^{13}\text{C}$  NMR ( $\text{CDCl}_3$ ):  $\delta$  24.0, 24.4, 83.3, 84.1, 124.9, 125.2, 125.3, 125.7, 125.8, 125.9, 126.3, 126.7, 127.0, 127.09, 127.14, 127.4, 127.7, 127.76, 127.79, 128.0, 128.2, 128.3, 128.4, 131.9, 133.2, 133.4, 134.5, 135.3, 141.5, 142.3; HRMS Calcd for  $\text{C}_{26}\text{H}_{25}\text{BO}_2$ :  $\text{M}^+$ , 380.1948. Found:  $m/z$  380.1942.

**4,4,5,5-Tetramethyl-2-[3-(biphenyl-4-yl)-naphthalen-2-yl]-[1,3,2]dioxaborolane (4ac)**

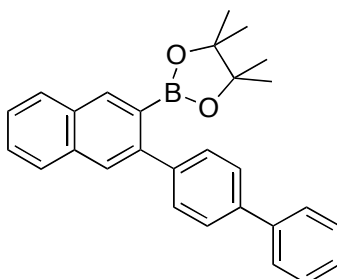

A white solid:  $^1\text{H}$  NMR ( $\text{CDCl}_3$ ):  $\delta$  1.28 (s, 12H,  $\text{CH}_3$ ), 7.38 (t,  $J = 8.7$  Hz, 1H, ArH), 7.47-7.70 (m, 10H, ArH), 7.85-7.92 (m, 3H, ArH), 8.31 (s, 1H, ArH);  $^{13}\text{C}$  NMR ( $\text{CDCl}_3$ ):  $\delta$  24.6, 83.9, 125.9, 126.6, 127.10, 127.12, 127.2, 127.5, 127.8, 128.1, 128.8, 129.75, 129.83, 131.7, 134.3, 136.0, 139.6, 141.1, 142.2, 143.2; HRMS Calcd for  $\text{C}_{28}\text{H}_{27}\text{BO}_2$ :  $\text{M}^+$ , 406.2104. Found:  $m/z$  406.2089.

**4,4,5,5-Tetramethyl-2-[3-(4-*n*-butylphenyl)-naphthalen-2-yl]-[1,3,2]dioxaborolane (4ad)**

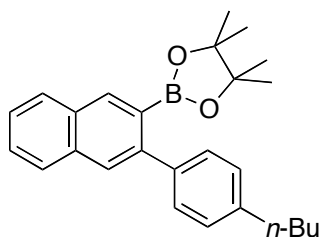

A yellow oil:  $^1\text{H}$  NMR ( $\text{CDCl}_3$ ):  $\delta$  0.96 (t,  $J = 7.7$  Hz, 3H,  $\text{CH}_3\text{CH}_2$ ), 1.26 (s, 12H,  $\text{CH}_3$ ), 1.40 (sext,  $J = 7.7$  Hz, 2H,  $\text{CH}_2$ ), 1.66 (quint,  $J = 7.7$  Hz, 2H,  $\text{CH}_2$ ), 2.69 (t,  $J = 7.7$  Hz, 2H,  $\text{ArCH}_2$ ), 7.23 (d,  $J = 7.7$  Hz, 2H,  $\text{ArH}$ ), 7.41 (d,  $J = 7.7$  Hz, 2H,  $\text{ArH}$ ), 7.47 (t,  $J = 7.7$  Hz, 3H,  $\text{ArH}$ ), 7.51 (t,  $J = 6.8$  Hz, 1H,  $\text{ArH}$ ), 7.82 (s, 1H,  $\text{ArH}$ ), 7.83 (d,  $J = 8.7$  Hz, 1H,  $\text{ArH}$ ), 7.89 (d,  $J = 6.8$  Hz, 1H,  $\text{ArH}$ ), 8.26 (s, 1H,  $\text{ArH}$ );  $^{13}\text{C}$  NMR ( $\text{CDCl}_3$ ):  $\delta$  14.0, 22.2, 24.6, 33.8, 35.3, 83.8, 127.2, 127.3, 127.8, 127.9, 128.1, 129.0, 129.2, 131.6, 134.2, 135.6, 135.7, 140.5, 141.4, 143.6; HRMS Calcd for  $\text{C}_{26}\text{H}_{31}\text{BO}_2$ :  $\text{M}^+$ , 386.2417. Found:  $m/z$  386.2415.

**4,4,5,5-Tetramethyl-2-[3-(2,5-dimethoxyphenyl)-naphthalen-2-yl]-[1,3,2]dioxaborolane (4ae)**

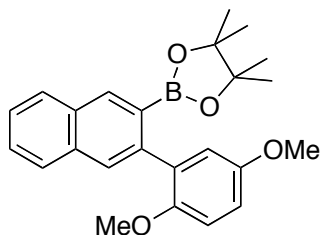

A pale yellow oil:  $^1\text{H}$  NMR ( $\text{CDCl}_3$ ):  $\delta$  1.23 (s, 12H,  $\text{CH}_3$ ), 3.62 (s, 3H,  $\text{OCH}_3$ ), 3.83 (s, 3H,  $\text{OCH}_3$ ), 6.82-6.97 (m, 3H,  $\text{ArH}$ ), 7.45-7.51 (m, 2H,  $\text{ArH}$ ), 7.76 (s, 1H,  $\text{ArH}$ ), 7.82 (d,  $J = 7.7$  Hz, 1H,  $\text{ArH}$ ), 7.89 (d,  $J = 8.7$  Hz, 1H,  $\text{ArH}$ ), 8.39 (s, 1H,  $\text{ArH}$ );  $^{13}\text{C}$  NMR ( $\text{CDCl}_3$ ):  $\delta$  24.7, 55.7, 56.5, 83.4, 112.6, 113.0, 116.6, 125.7, 126.3, 126.7, 127.8, 128.0, 128.1, 131.8, 133.7, 134.4, 135.0, 140.0, 151.4, 153.7; HRMS Calcd for  $\text{C}_{24}\text{H}_{27}\text{BO}_4$ :  $\text{M}^+$ , 390.2002. Found:  $m/z$  390.2000.

**4,4,5,5-Tetramethyl-2-[3-(4-trifluoromethylphenyl)-naphthalen-2-yl]-[1,3,2]dioxaborolane (4af)**

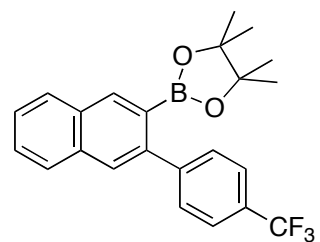

A yellow oil:  $^1\text{H}$  NMR ( $\text{CDCl}_3$ ):  $\delta$  1.27 (s, 12H,  $\text{CH}_3$ ), 7.50-7.68 (m, 6H, ArH), 7.79-7.93 (m, 3H, ArH), 8.34 (s, 1H, ArH);  $^{13}\text{C}$  NMR ( $\text{CDCl}_3$ ):  $\delta$  24.6, 84.0, 124.5, 124.6, 126.3, 126.9, 127.4, 127.7, 127.9, 128.3, 129.1, 129.7, 130.2, 131.4, 131.9, 134.1, 136.5, 136.9, 142.4, 146.8; HRMS Calcd for  $\text{C}_{23}\text{H}_{22}\text{BF}_3\text{O}_2$ :  $\text{M}^+$ , 398.1665. Found:  $m/z$  398.1654.

**4,4,5,5-Tetramethyl-2-[3-(4-bromophenyl)-naphthalen-2-yl]-[1,3,2]dioxaborolane (4ag)**

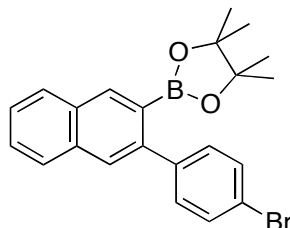

A pale yellow oil:  $^1\text{H}$  NMR ( $\text{CDCl}_3$ ):  $\delta$  1.27 (s, 12H,  $\text{CH}_3$ ), 7.36 (d,  $J = 8.7$  Hz, 2H, ArH), 7.47-7.57 (m, 4H, ArH), 7.77 (s, 1H, ArH), 7.83 (d,  $J = 7.7$  Hz, 1H, ArH), 7.90 (d,  $J = 7.7$  Hz, 1H, ArH), 8.31 (s, 1H, ArH);  $^{13}\text{C}$  NMR ( $\text{CDCl}_3$ ):  $\delta$  24.6, 83.9, 121.0, 126.1, 127.3, 127.5, 127.8, 128.1, 130.7, 131.0, 131.8, 134.2, 136.4, 142.1, 142.5; HRMS Calcd for  $\text{C}_{22}\text{H}_{22}\text{BBrO}_2$ :  $\text{M}^+$ , 408.0896. Found:  $m/z$  408.0901.

**4,4,5,5-Tetramethyl-2-[3-(4-ethynylphenyl)-naphthalen-2-yl]-[1,3,2]dioxaborolane (4ah)**

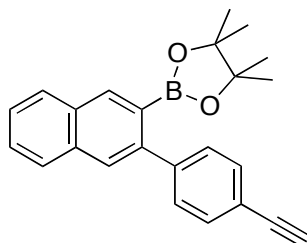

A pale yellow oil:  $^1\text{H}$  NMR ( $\text{CDCl}_3$ ):  $\delta$  1.26 (s, 12H,  $\text{CH}_3$ ), 3.14 (s, 1H, CH), 7.45-7.55 (m, 6H, ArH), 7.79 (s, 1H, ArH), 7.84 (d,  $J = 7.7$  Hz, 1H, ArH), 7.90 (d,  $J = 8.7$  Hz, 1H, ArH), 8.30 (s, 1H, ArH);  $^{13}\text{C}$  NMR ( $\text{CDCl}_3$ ):  $\delta$  24.6, 77.2, 84.0, 120.4, 126.1, 127.28, 127.31, 127.6, 127.8, 128.1, 129.4, 131.6, 131.8, 132.5, 134.2, 136.3, 142.8, 143.8; HRMS Calcd for  $\text{C}_{24}\text{H}_{23}\text{BO}_2$ :  $\text{M}^+$ , 354.1791. Found:  $m/z$  354.1798.

**4,4,5,5-Tetramethyl-2-[3-(2-thienyl)-naphthalen-2-yl]-[1,3,2]dioxaborolane (4aj)**

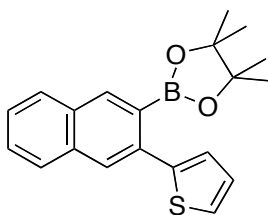

A yellow oil:  $^1\text{H}$  NMR ( $\text{CDCl}_3$ ):  $\delta$  1.31 (s, 12H,  $\text{CH}_3$ ), 7.08 (t,  $J = 3.9$  Hz, 1H, ArH-thiophene), 7.18 (d,  $J = 4.8$  Hz, 1H, ArH-thiophene), 7.33 (d,  $J = 3.9$  Hz, 1H, ArH-thiophene), 7.46-7.53 (m, 2H, ArH), 7.84 (dd,  $J = 18.3, 7.7$  Hz, 2H, ArH), 7.91 (s, 1H, ArH), 8.21 (s, 1H, ArH);  $^{13}\text{C}$  NMR ( $\text{CDCl}_3$ ):  $\delta$  24.7, 84.0, 125.1, 126.1, 126.4, 127.0, 127.2, 127.8, 128.07, 128.14, 132.0, 134.1, 135.6, 135.8, 145.0; HRMS Calcd for  $\text{C}_{20}\text{H}_{21}\text{BO}_2\text{S}$ :  $\text{M}^+$ , 336.1355. Found:  $m/z$  336.1353.

**4,4,5,5-Tetramethyl-2-(3-*n*-hexyl-naphthalen-2-yl)-[1,3,2]dioxaborolane (4al)**

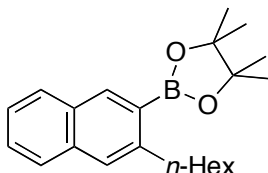

A pale yellow oil:  $^1\text{H}$  NMR ( $\text{CDCl}_3$ ):  $\delta$  0.89 (t,  $J = 7.7$  Hz, 3H,  $\text{CH}_3\text{CH}_2$ ), 1.27-1.39 (m, 18H,  $\text{CH}_3$  and  $\text{CH}_2$ ), 1.61 (quint,  $J = 7.8$  Hz, 2H,  $\text{CH}_2$ ), 3.00 (t,  $J = 7.8$  Hz, 2H, Ar $\text{CH}_2$ ), 7.38 (t,  $J = 7.7$  Hz, 1H, ArH), 7.46 (t,  $J = 7.7$  Hz, 1H, ArH), 7.58 (s, 1H, ArH), 7.74 (d,  $J = 7.7$  Hz, 1H, ArH), 7.83 (d,  $J = 7.7$  Hz, 1H, ArH), 8.32 (s, 1H, ArH);  $^{13}\text{C}$  NMR ( $\text{CDCl}_3$ ):  $\delta$  14.1, 22.7, 24.9, 29.5, 31.9, 33.4, 36.1, 83.5, 124.8, 126.7, 126.9, 127.0, 128.2, 131.1, 134.9, 137.5, 145.6; HRMS Calcd for  $\text{C}_{22}\text{H}_{31}\text{BO}_2$ :  $\text{M}^+$ , 338.2417. Found:  $m/z$  338.2415.

**A mixture of 2-(3,4-diphenylnaphthalen-2-yl)-4,4,5,5-tetramethyl-1,3,2-dioxaborolane (4ba) and 2-(1,3-diphenylnaphthalen-2-yl)-4,4,5,5-tetramethyl-1,3,2-dioxaborolane (4'ba) (4ba:4'ba = 93:7)**

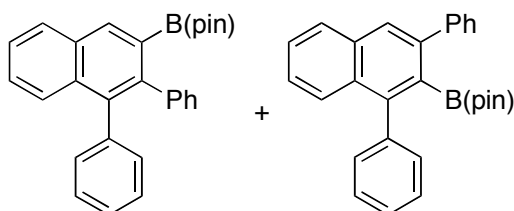

A yellow solid:  $^1\text{H}$  NMR ( $\text{CDCl}_3$ ):  $\delta$  1.14 (s,  $\text{CH}_3$ ), 7.11-7.28 (m, ArH), 7.37-7.55 (m, ArH), 7.68 (d,  $J = 8.6$  Hz, ArH), 7.94 (d,  $J = 7.6$  Hz, ArH), 8.19 (s, ArH), 8.26 (s, ArH);  $^{13}\text{C}$  NMR ( $\text{CDCl}_3$ ):  $\delta$  24.5, 24.9, 83.6, 83.8, 125.5, 125.8, 126.3, 126.7, 126.9, 127.5, 127.7, 128.2, 130.1, 130.5, 131.2, 131.9, 133.4, 134.3, 137.6, 139.1, 141.9, 142.5; HRMS Calcd for  $\text{C}_{28}\text{H}_{27}\text{BO}_2$ :  $\text{M}^+$ , 406.2104. Found:  $m/z$  406.2107.

A mixture of **4,4,5,5-tetramethyl-2-(2-phenyl-1,1'-binaphthyl-3-yl)-1,3,2-dioxaborolane (4ca)** and **4,4,5,5-tetramethyl-2-(3-phenyl-1,1'-binaphthyl-2-yl)-1,3,2-dioxaborolane (4'ca)** (**4ca:4'ca** = **89:11**)

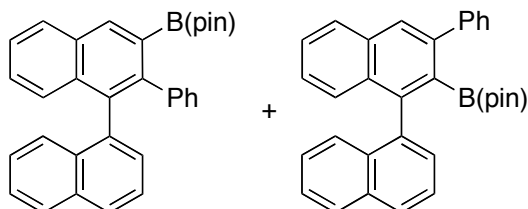

A pale yellow oil:  $^1\text{H}$  NMR ( $\text{CDCl}_3$ ):  $\delta$  1.07-1.17 (m,  $\text{CH}_3$ ), 6.96-7.48 (m,  $\text{ArH}$ ), 7.71-7.86 (m,  $\text{ArH}$ ), 7.99 (d,  $J = 7.8$  Hz,  $\text{ArH}$ ), 8.27 (s,  $\text{ArH}$ ), 8.35 (s,  $\text{ArH}$ ), 8.40 (d,  $J = 7.8$  Hz,  $\text{ArH}$ );  $^{13}\text{C}$  NMR ( $\text{CDCl}_3$ ):  $\delta$  24.3, 24.4, 24.5, 24.7, 83.7, 83.9, 125.0, 125.4, 125.56, 125.62, 125.8, 126.7, 126.8, 126.9, 127.0, 127.2, 127.9, 128.2, 128.3, 129.0, 131.7, 133.0, 133.4, 133.9, 134.6, 134.7, 135.6, 136.9, 142.4, 142.9; HRMS Calcd for  $\text{C}_{32}\text{H}_{29}\text{BO}_2$ :  $\text{M}^+$ , 456.2261. Found:  $m/z$  456.2247.

**2-(3,8-Diphenylnaphthalen-2-yl)-4,4,5,5-tetramethyl-1,3,2-dioxaborolane (4da)**

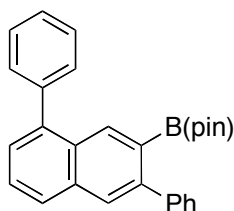

A yellow oil:  $^1\text{H}$  NMR ( $\text{CDCl}_3$ ):  $\delta$  1.27 (s, 12H,  $\text{CH}_3$ ), 7.32-7.54 (m, 12H,  $\text{ArH}$ ), 7.92 (s, 1H,  $\text{ArH}$ ), 7.93 (d,  $J = 8.7$  Hz, 1H,  $\text{ArH}$ ), 8.36 (s, 1H,  $\text{ArH}$ );  $^{13}\text{C}$  NMR ( $\text{CDCl}_3$ ):  $\delta$  24.6, 83.8, 125.3, 125.5, 126.7, 127.2, 127.7, 127.8, 128.2, 128.3, 129.3, 130.0, 132.0, 132.3, 136.3, 140.2, 140.5, 143.3, 143.8; HRMS Calcd for  $\text{C}_{28}\text{H}_{27}\text{BO}_2$ :  $\text{M}^+$ , 406.2104. Found:  $m/z$  406.2095.

**2-(3,5-Diphenylnaphthalen-2-yl)-4,4,5,5-tetramethyl-1,3,2-dioxaborolane (4'da)**

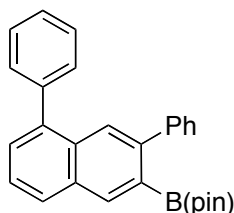

A yellow oil:  $^1\text{H}$  NMR ( $\text{CDCl}_3$ ):  $\delta$  1.17 (s, 12H,  $\text{CH}_3$ ), 7.37-7.57 (m, 12H,  $\text{ArH}$ ), 7.86 (d,  $J = 7.7$  Hz, 1H,  $\text{ArH}$ ), 7.89 (s, 1H,  $\text{ArH}$ ), 8.32 (s, 1H,  $\text{ArH}$ );  $^{13}\text{C}$  NMR ( $\text{CDCl}_3$ ):  $\delta$  24.5, 83.8, 126.5, 126.8, 127.1, 127.2, 127.6, 127.7, 127.9, 128.2, 129.2, 129.7, 130.2, 133.3, 134.6,

140.5, 140.6, 143.0, 143.3; HRMS Calcd for  $C_{28}H_{27}BO_2$ :  $M^+$ , 406.2104. Found:  $m/z$  406.2119.

**A mixture of 4,4,5,5-tetramethyl-2-(3-phenylphenanthren-2-yl)-1,3,2-dioxaborolane (4ea) and 4,4,5,5-tetramethyl-2-(2-phenylphenanthren-3-yl)-1,3,2-dioxaborolane (4'ea) (4ea:4'ea = 50:50)**

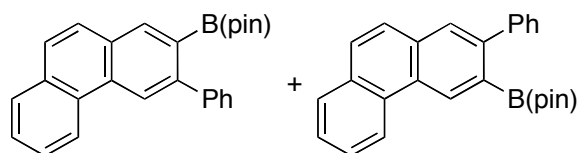

A yellow oil:  $^1H$  NMR ( $CDCl_3$ ):  $\delta$  1.27 (s,  $CH_3$ ), 1.29 (s,  $CH_3$ ), 7.38-7.91 (m, ArH), 8.30 (s, ArH), 8.65 (s, ArH), 8.72 (d,  $J = 6.7$  Hz, ArH), 8.82 (d,  $J = 7.8$  Hz, ArH), 9.09 (s, ArH);  $^{13}C$  NMR ( $CDCl_3$ ):  $\delta$  24.6, 24.7, 83.91, 83.92, 122.90, 122.91, 126.46, 126.50, 126.7, 126.82, 126.84, 126.88, 126.89, 126.93, 127.8, 127.9, 128.16, 128.22, 128.3, 128.4, 128.5, 128.6, 129.4, 129.5, 130.0, 130.1, 130.2, 131.4, 132.0, 132.7, 133.2, 136.0, 143.0, 143.5, 144.97, 145.01; HRMS Calcd for  $C_{26}H_{25}BO_2$ :  $M^+$ , 380.1948. Found:  $m/z$  380.1950.

## References

- 1 H. Yoshida, S. Nakano, Y. Yamaryo, J. Ohshita and A. Kunai, *Org. Lett.*, 2006, **8**, 4157.
- 2 S. Pereira and M. Srebnik, *Organometallics*, 1995, **14**, 3127.



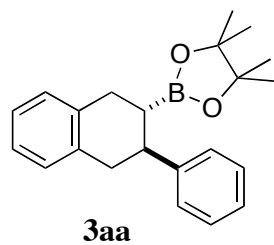

<sup>1</sup>H

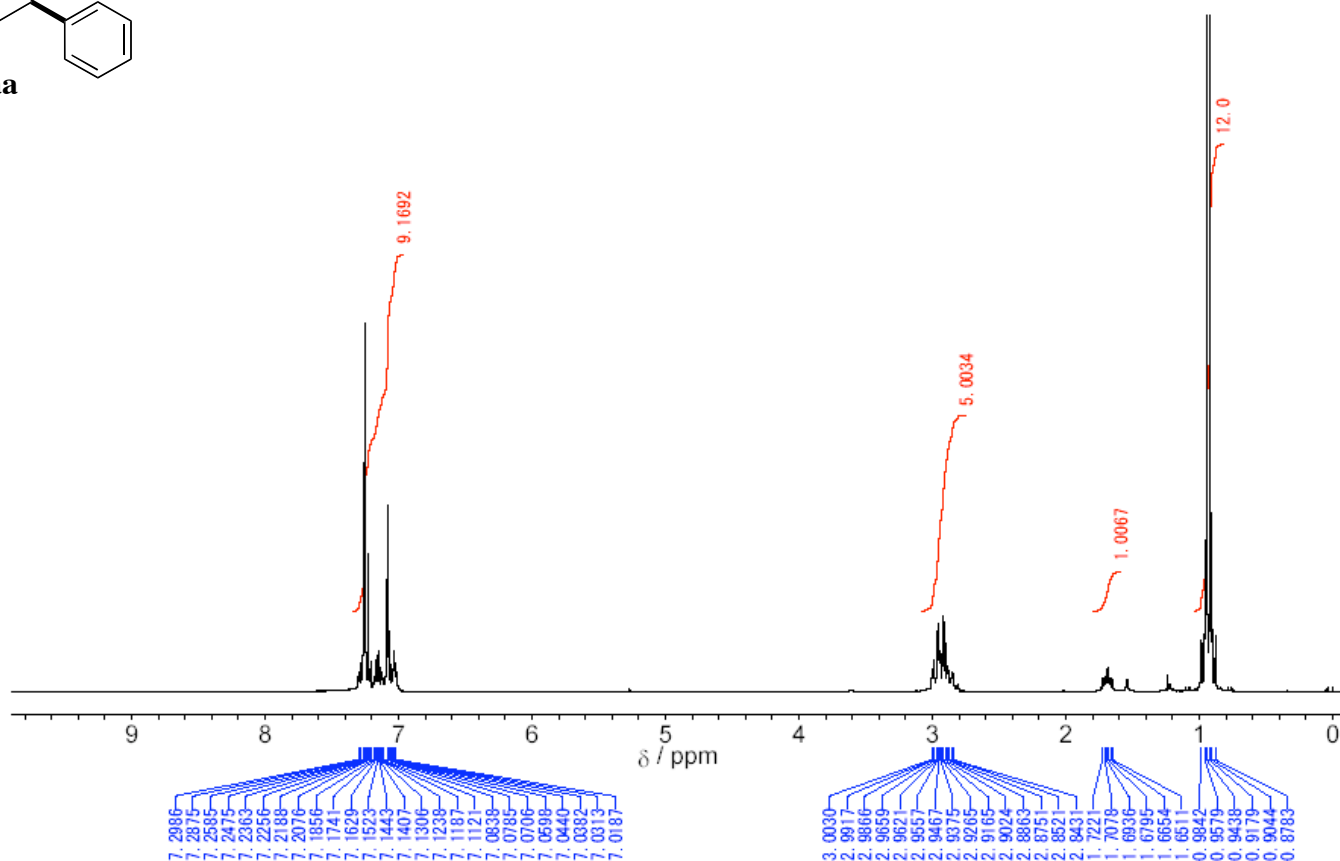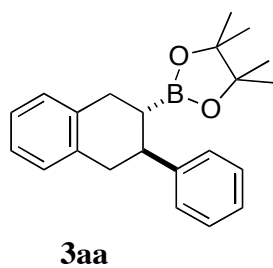

<sup>13</sup>C

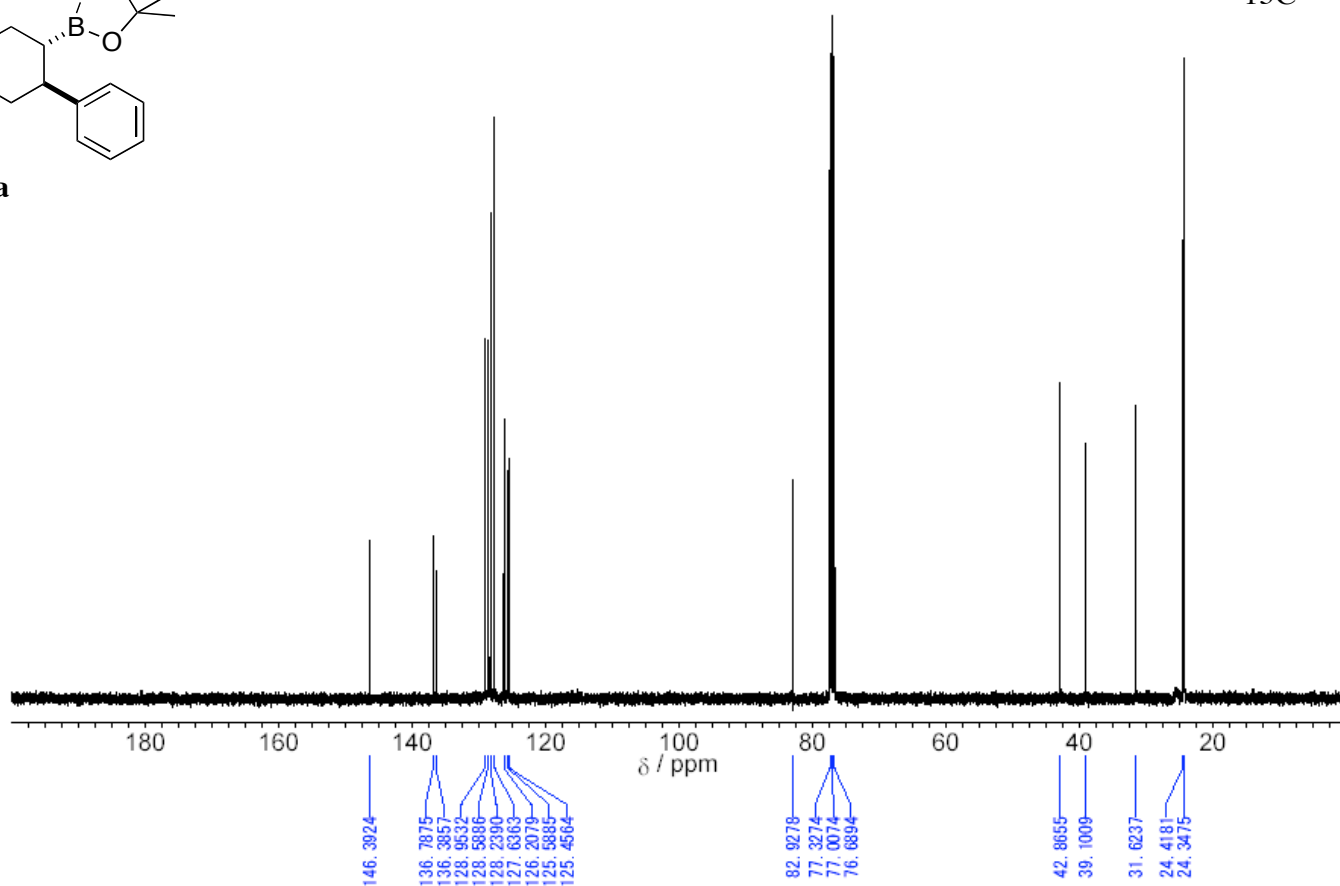

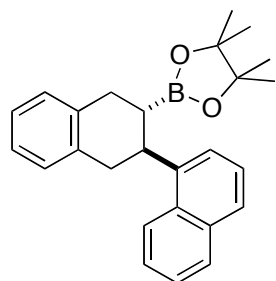

**3ab**

<sup>1</sup>H

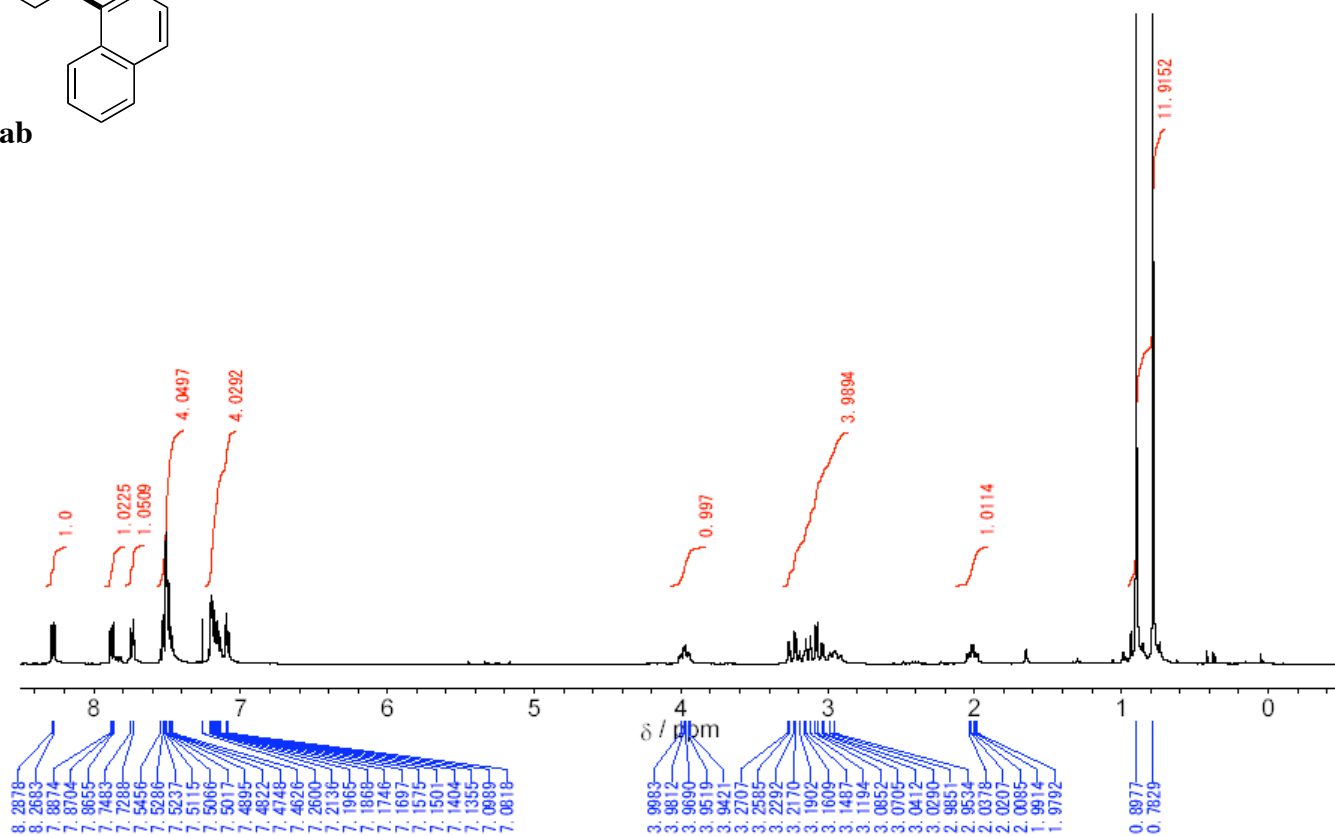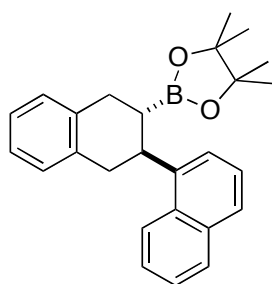

**3ab**

<sup>13</sup>C

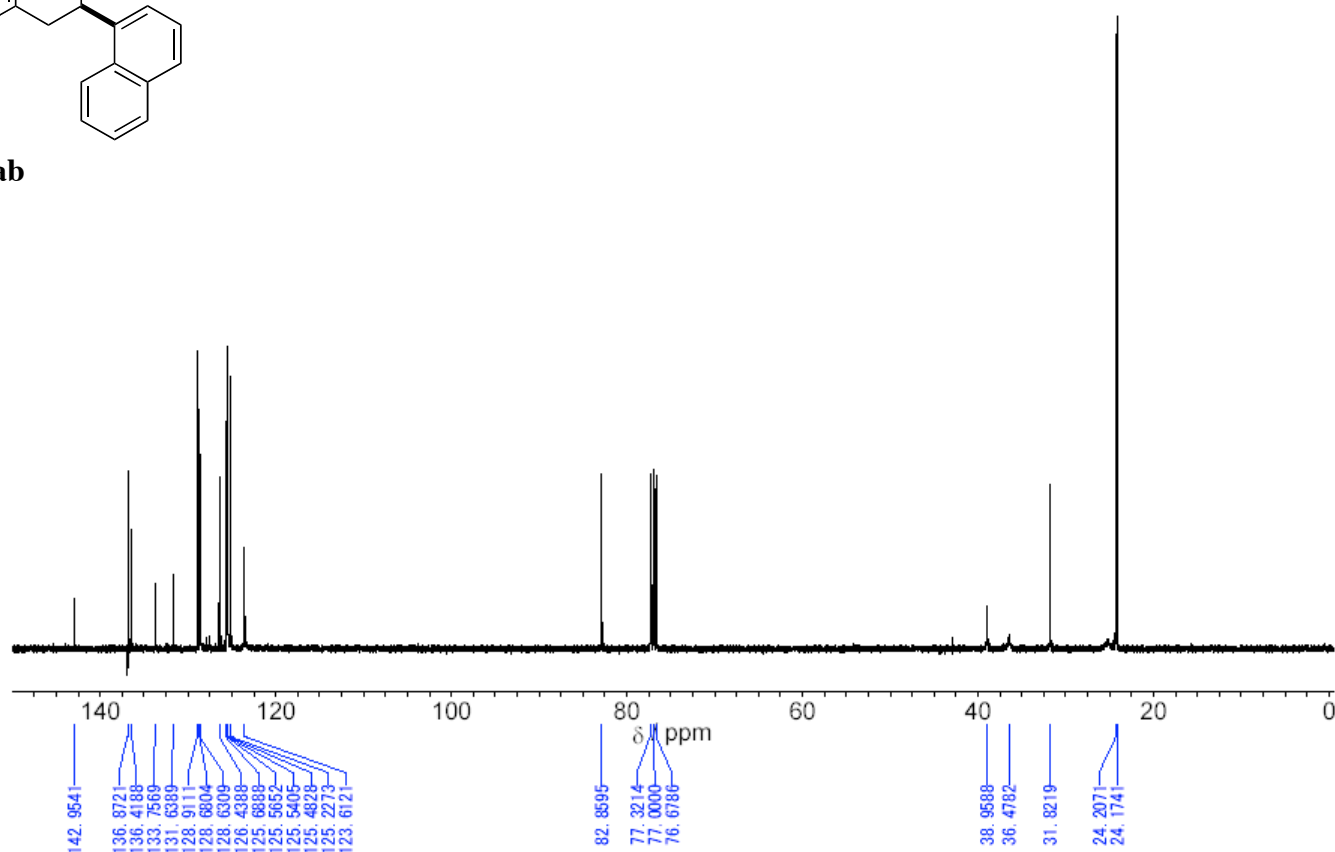

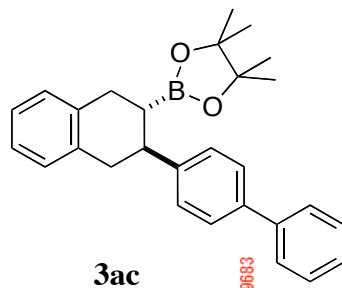

<sup>1</sup>H

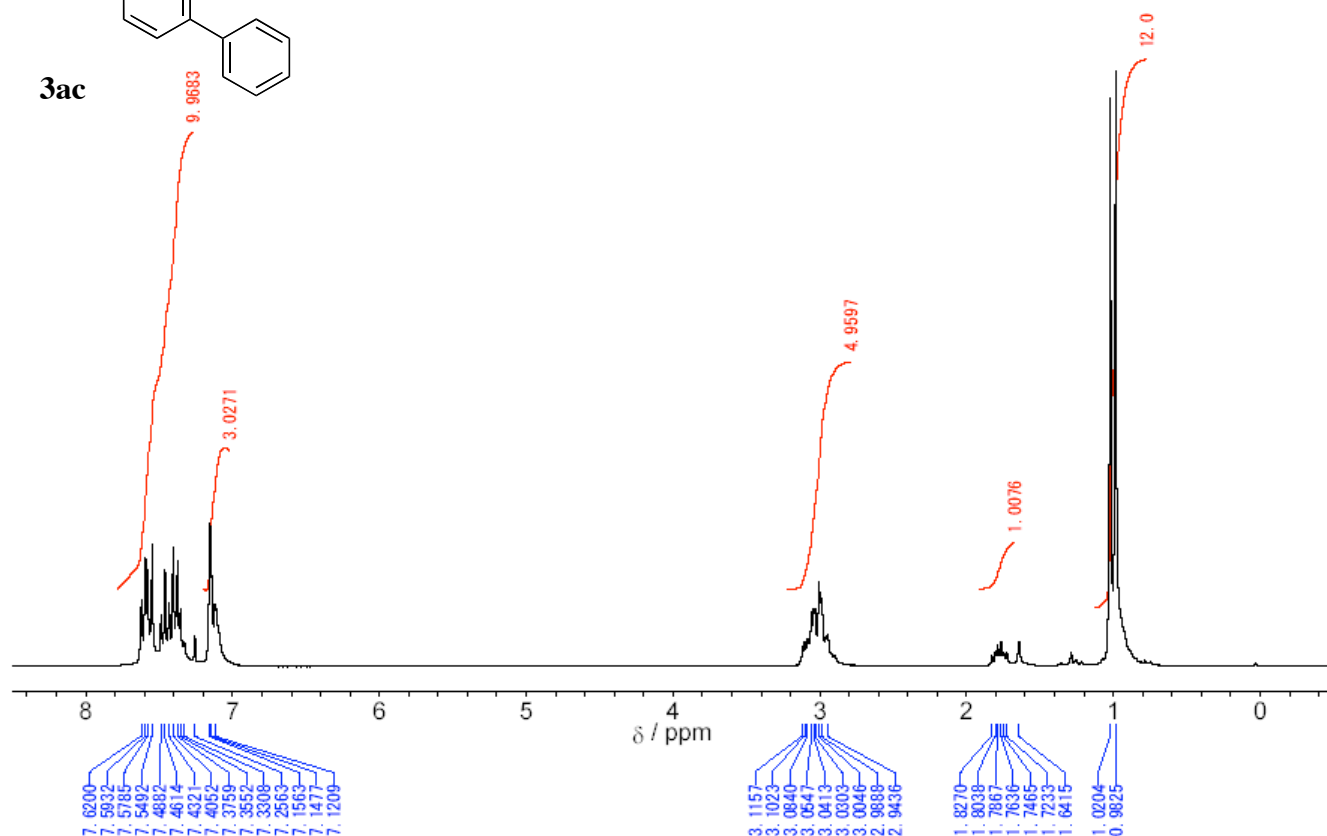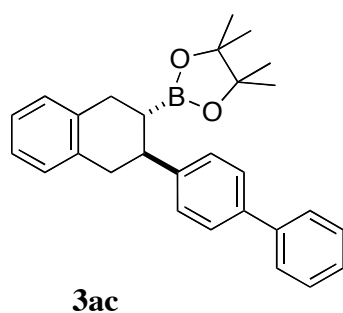

<sup>13</sup>C

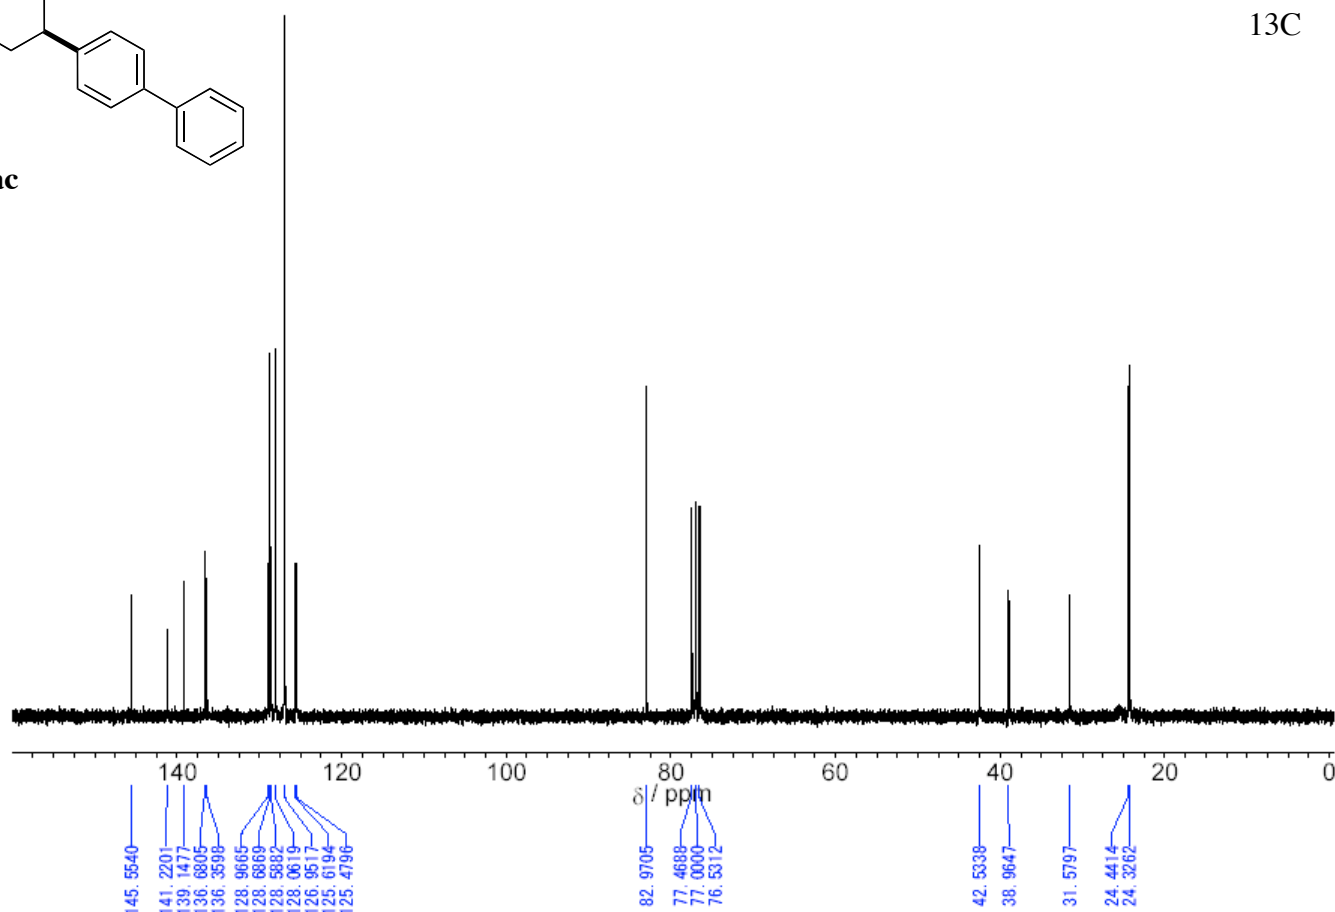

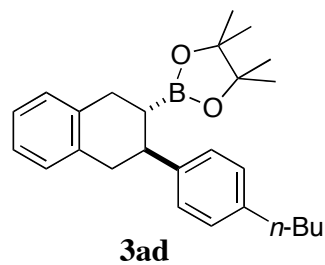

<sup>1</sup>H

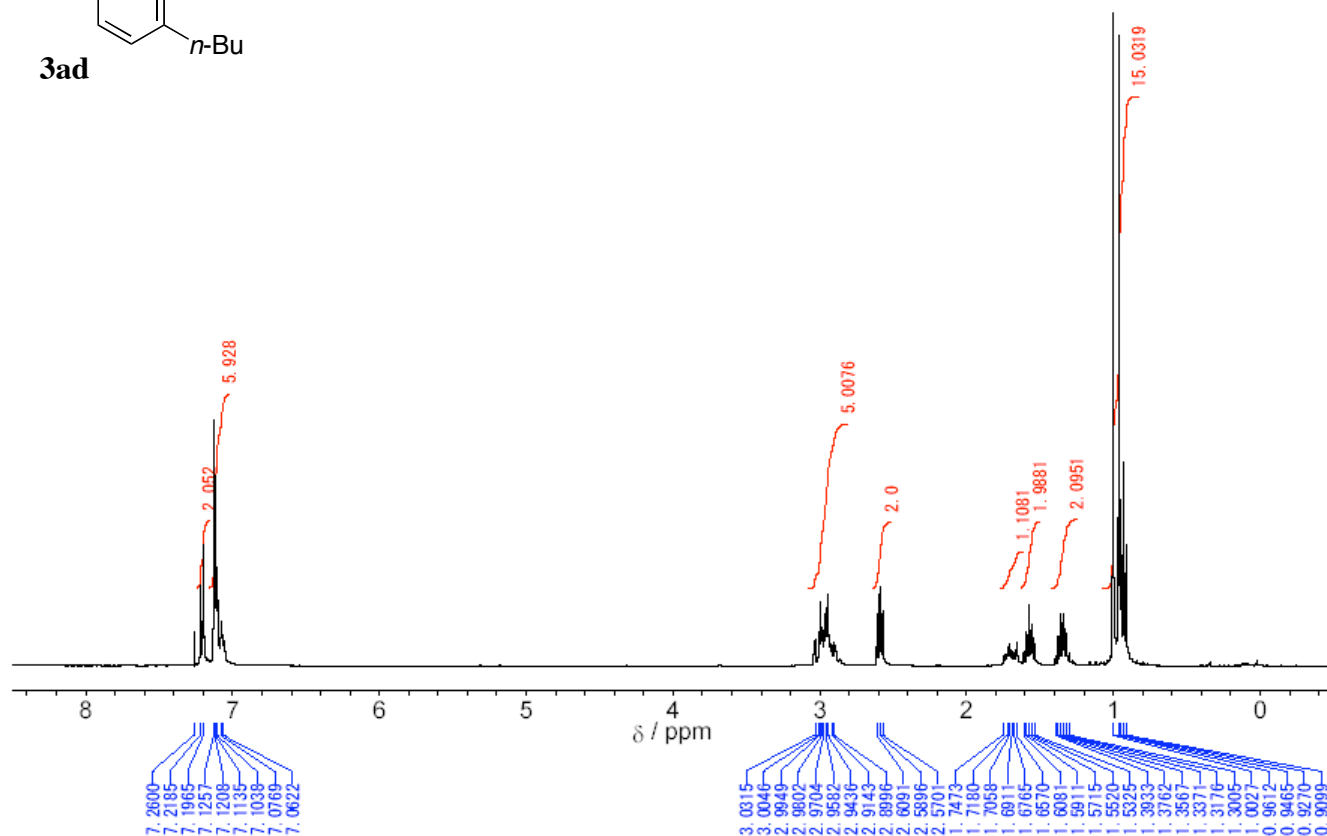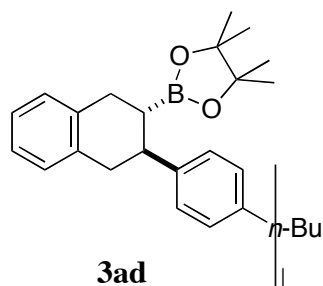

<sup>13</sup>C

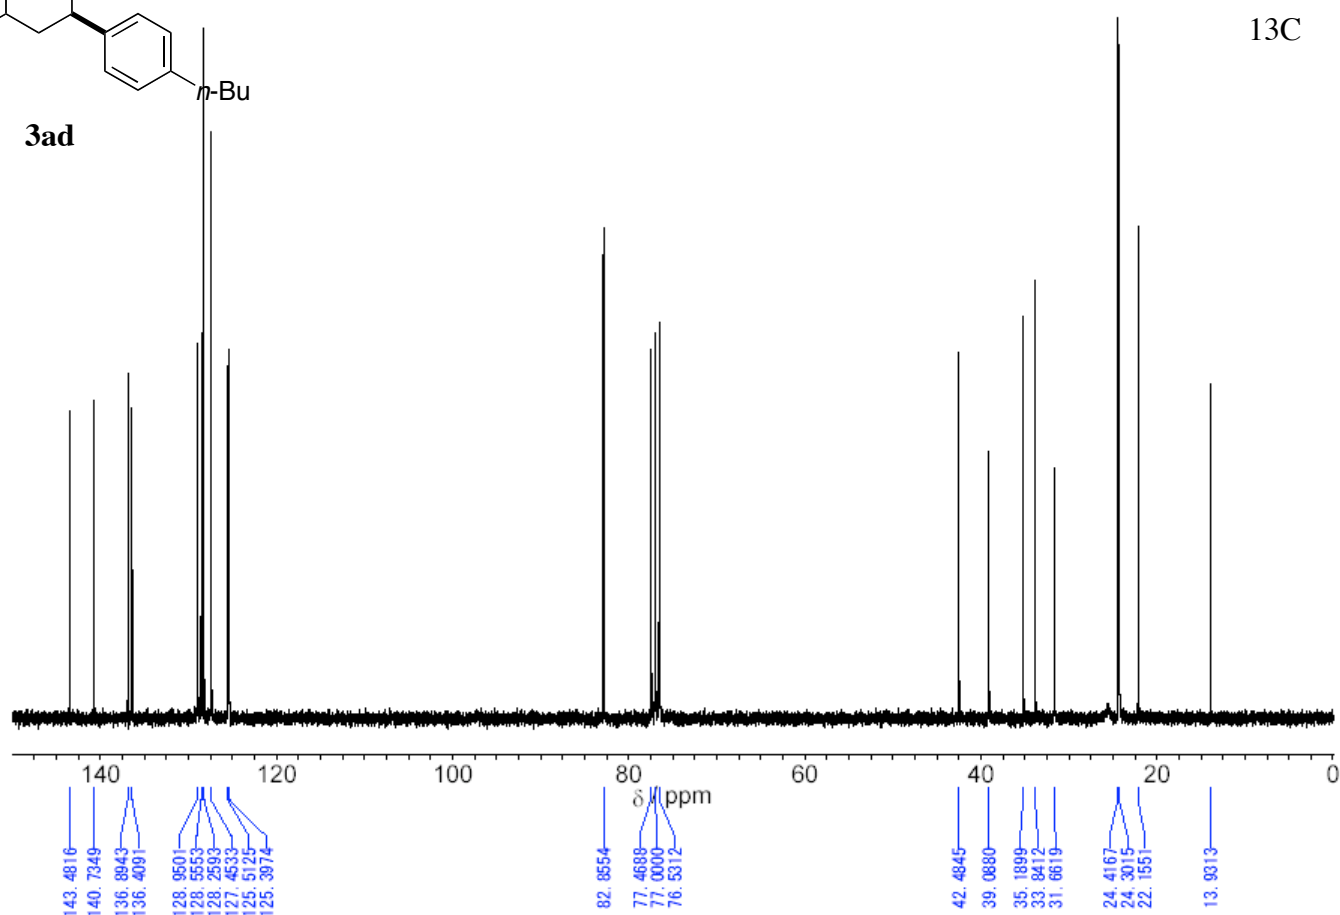

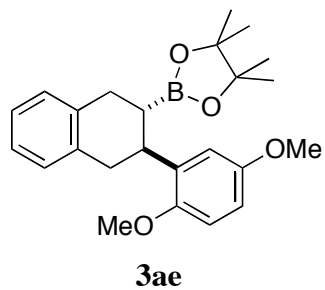

<sup>1</sup>H

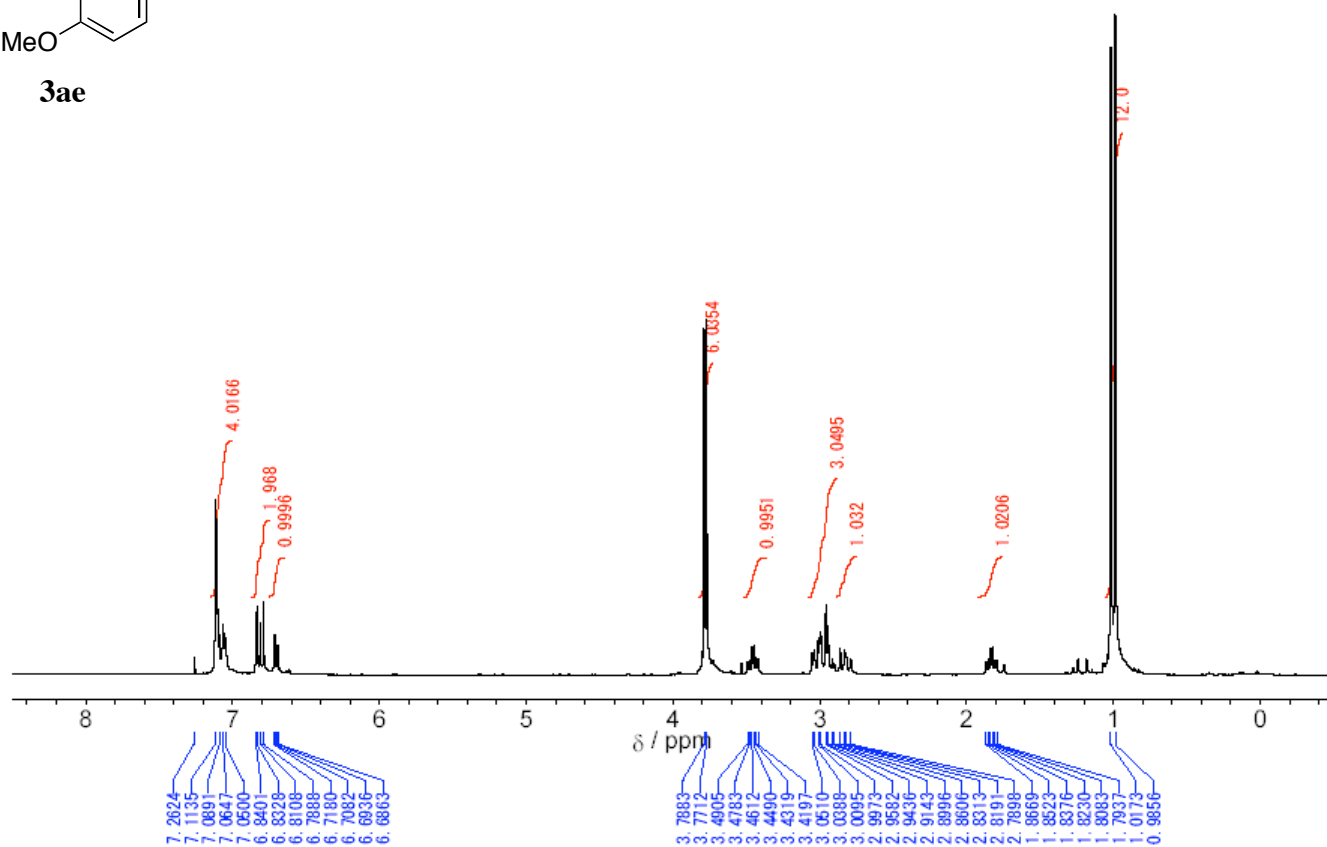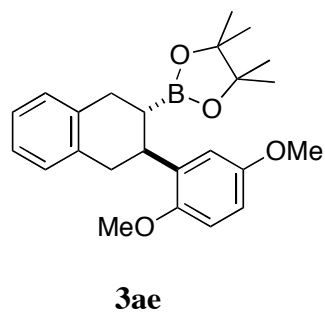

<sup>13</sup>C

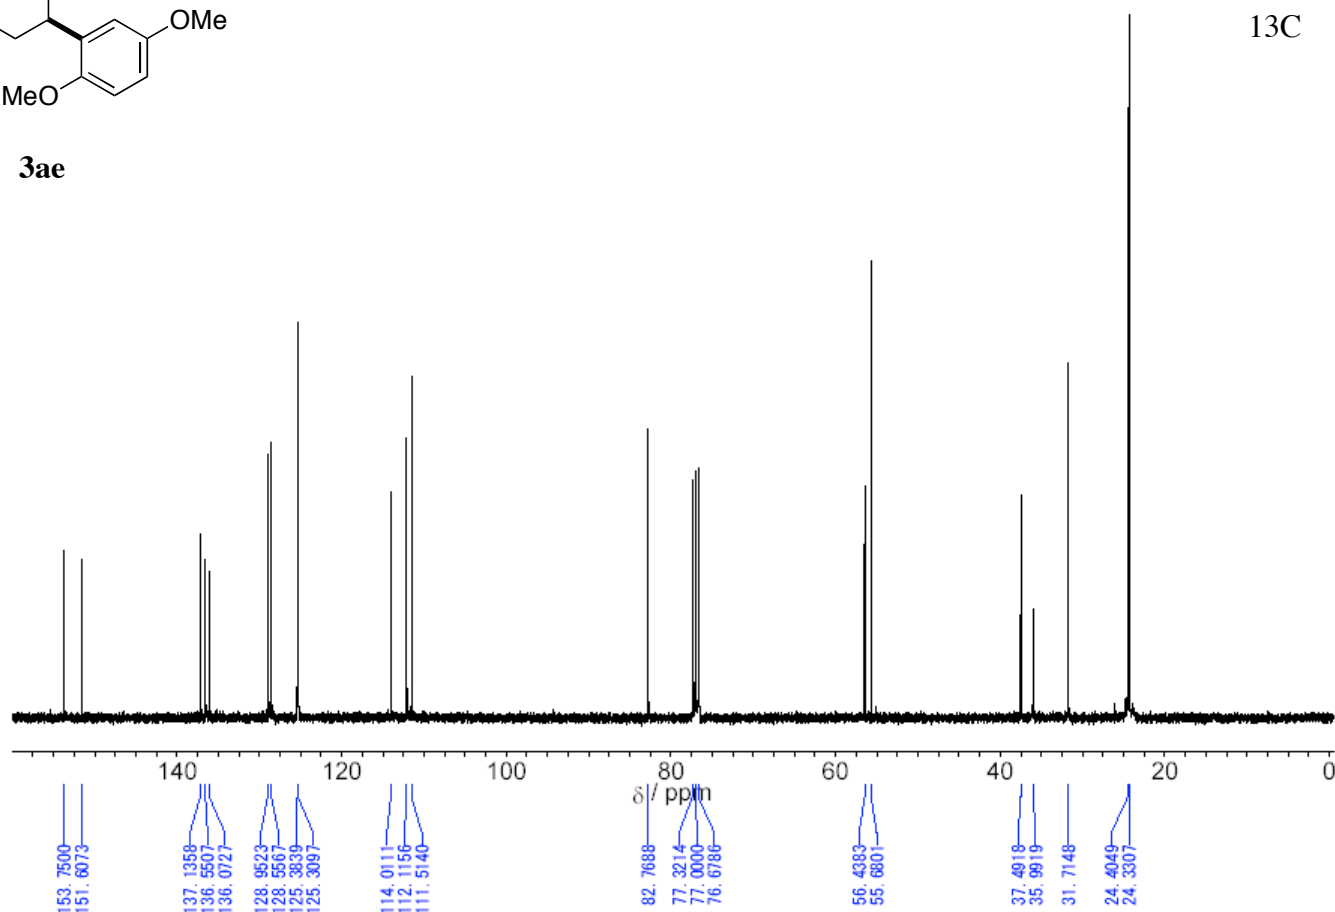

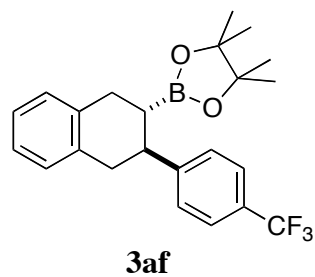

<sup>1</sup>H

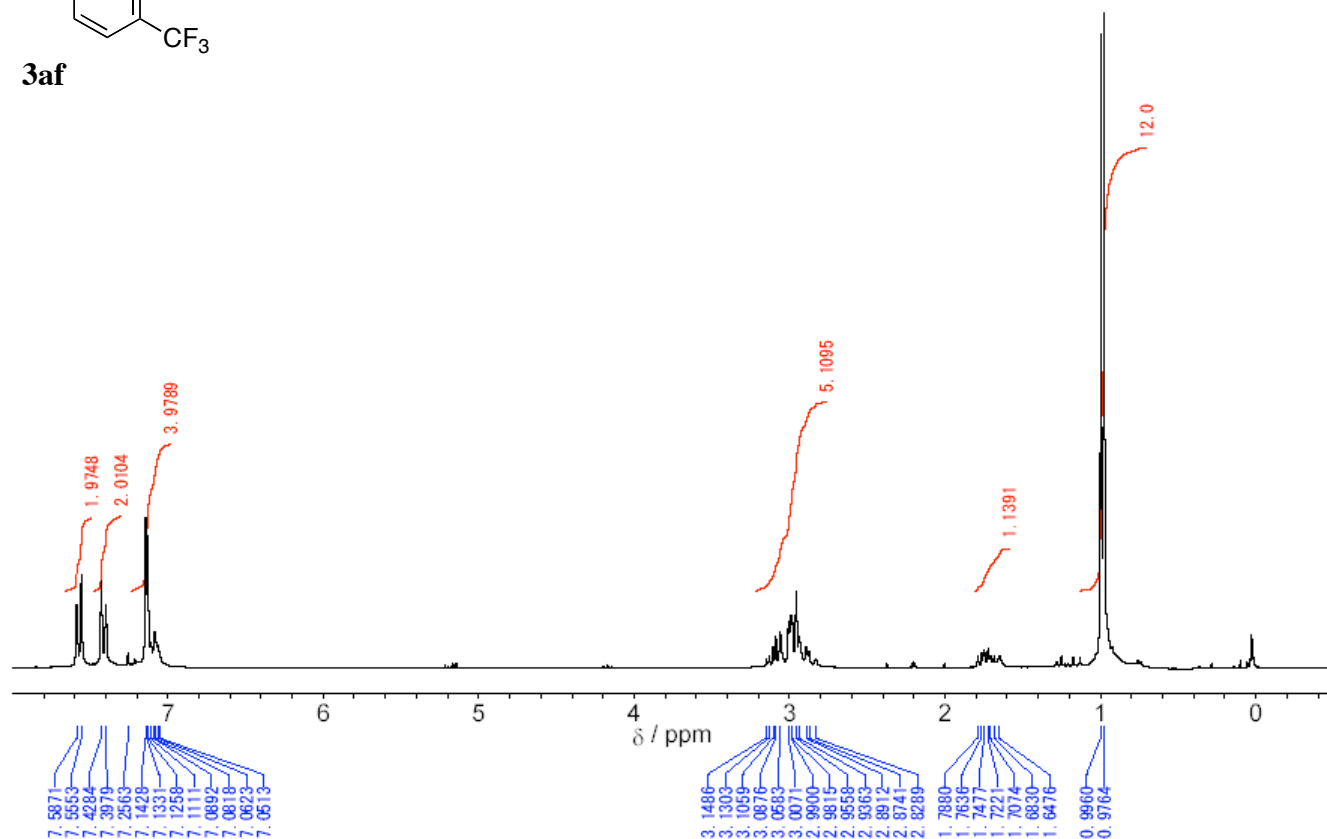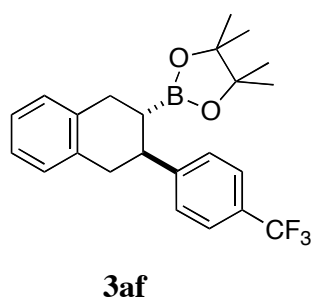

<sup>13</sup>C

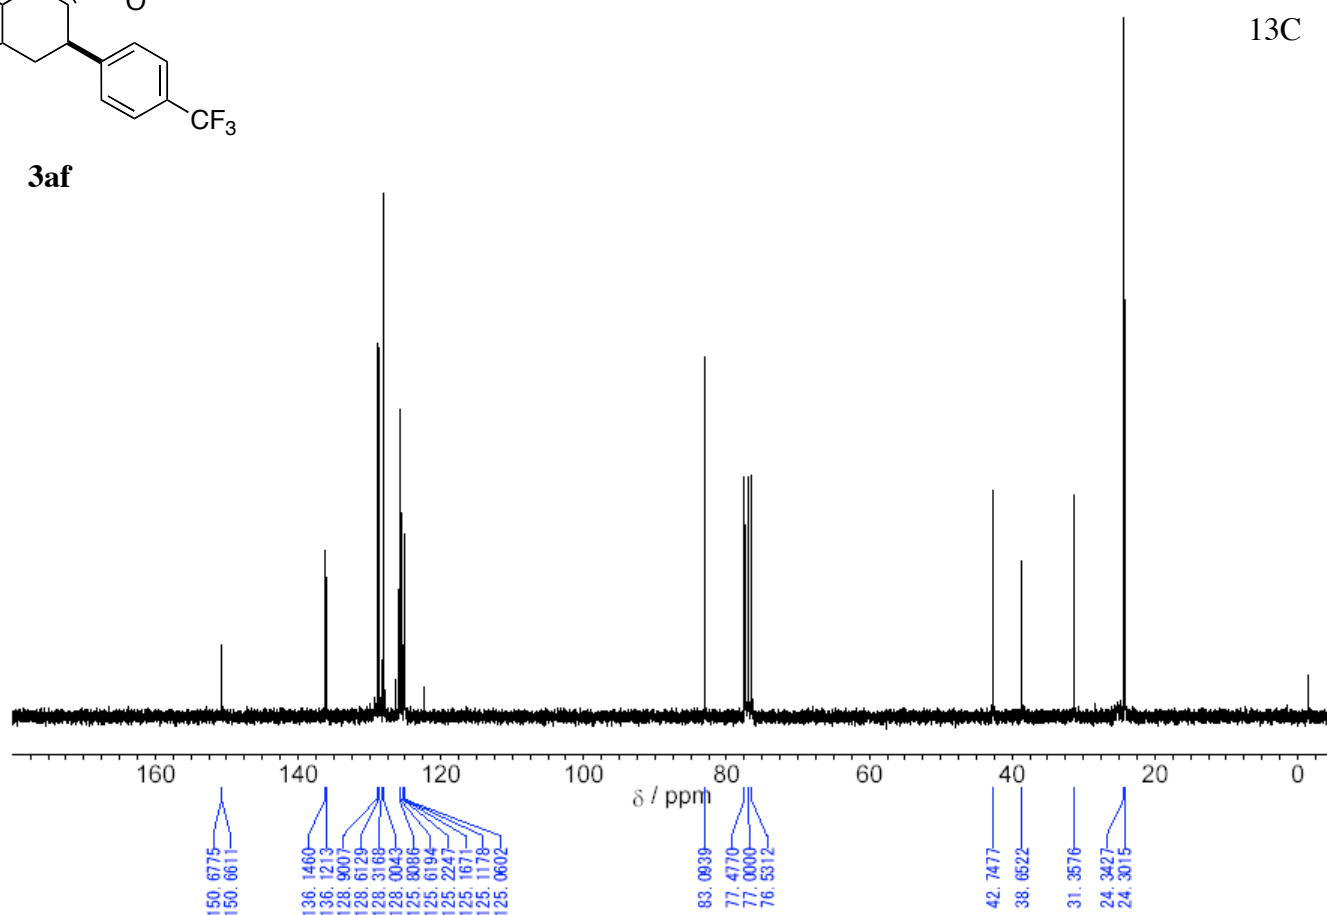

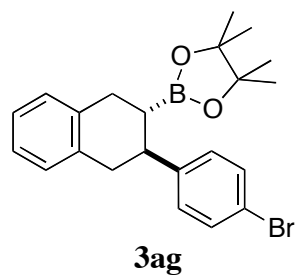

<sup>1</sup>H

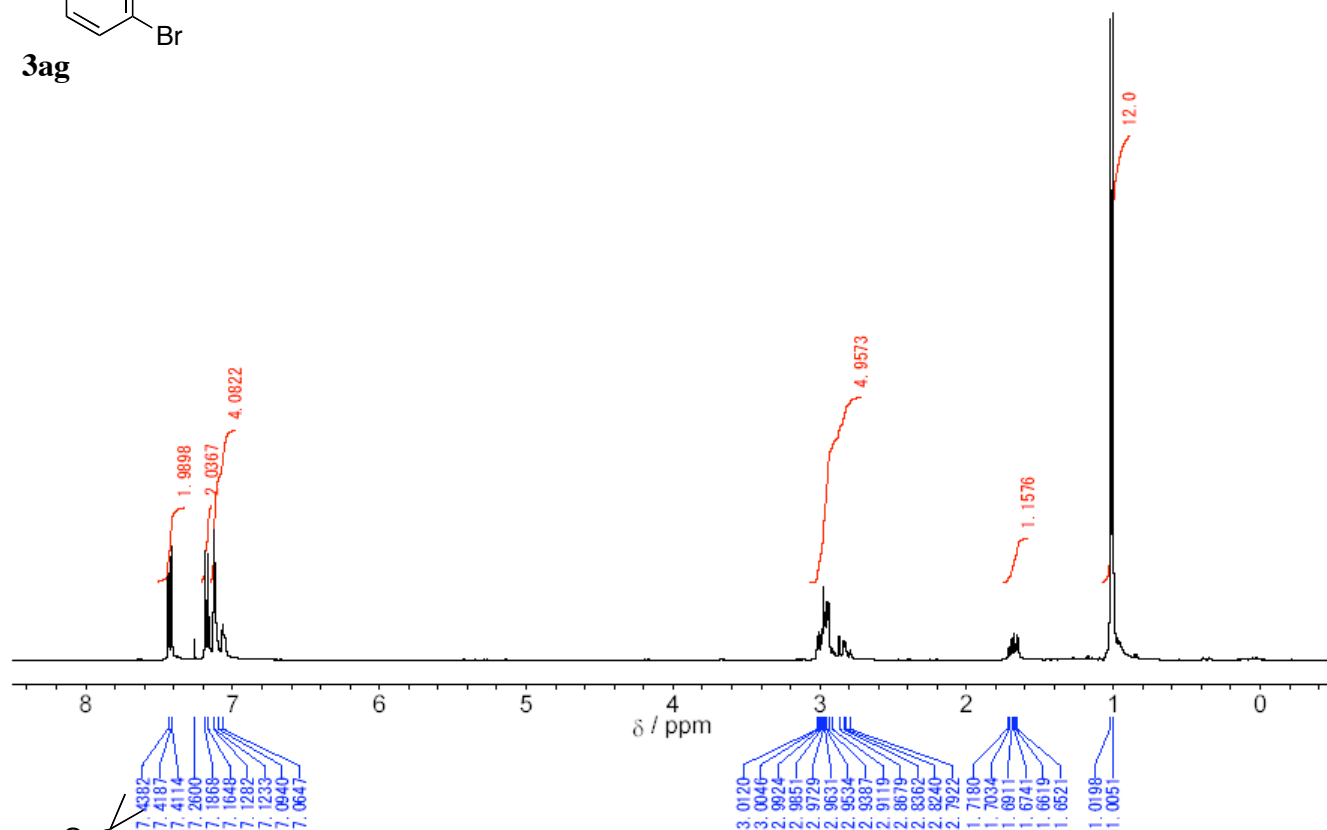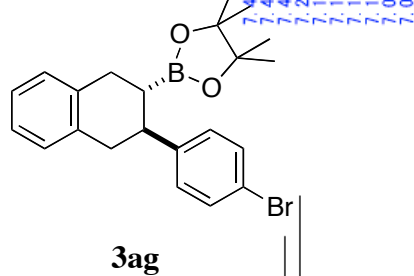

<sup>13</sup>C

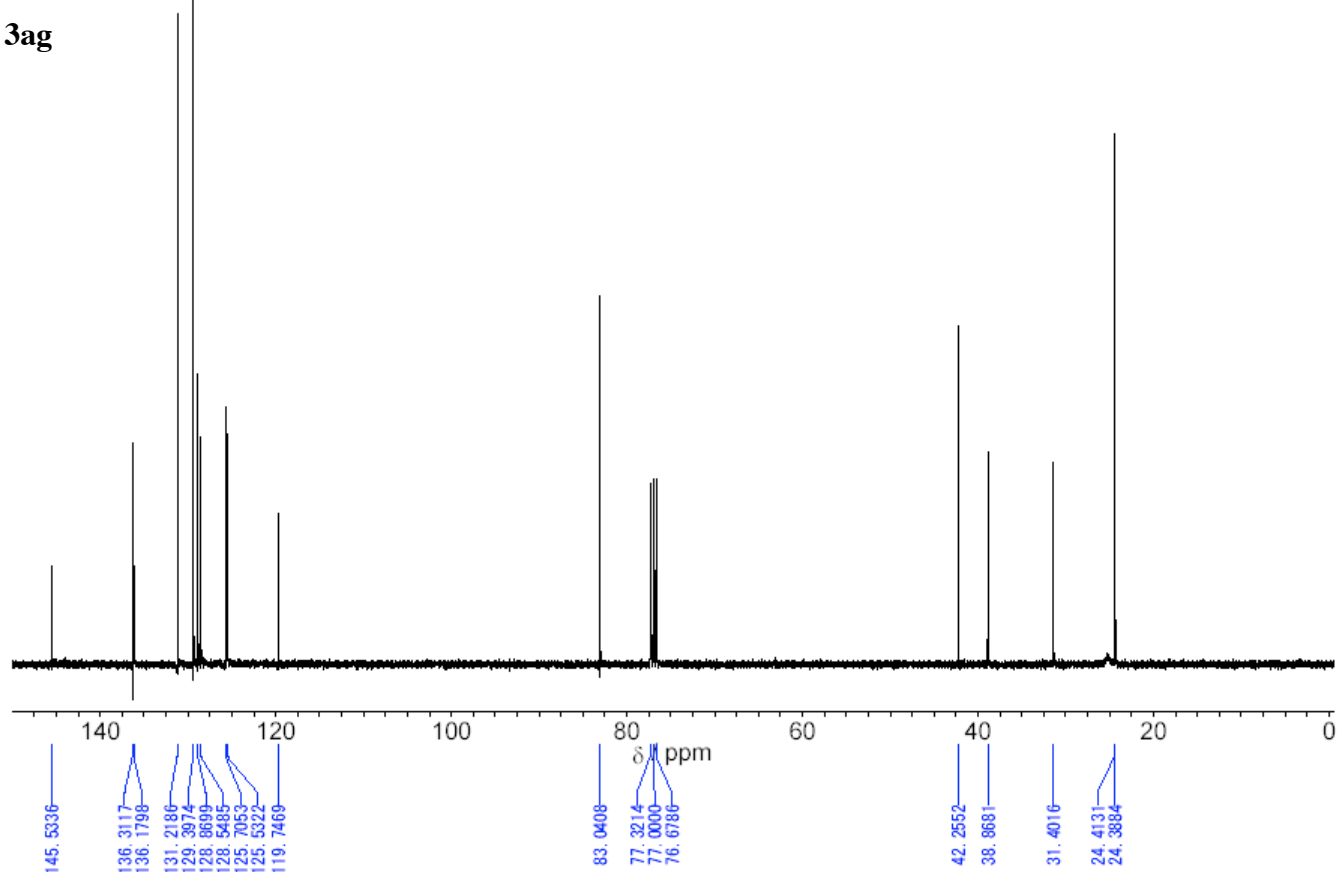

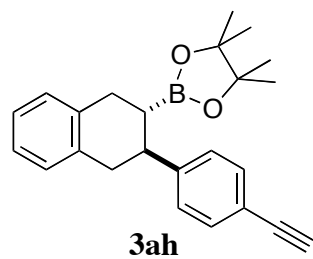

<sup>1</sup>H

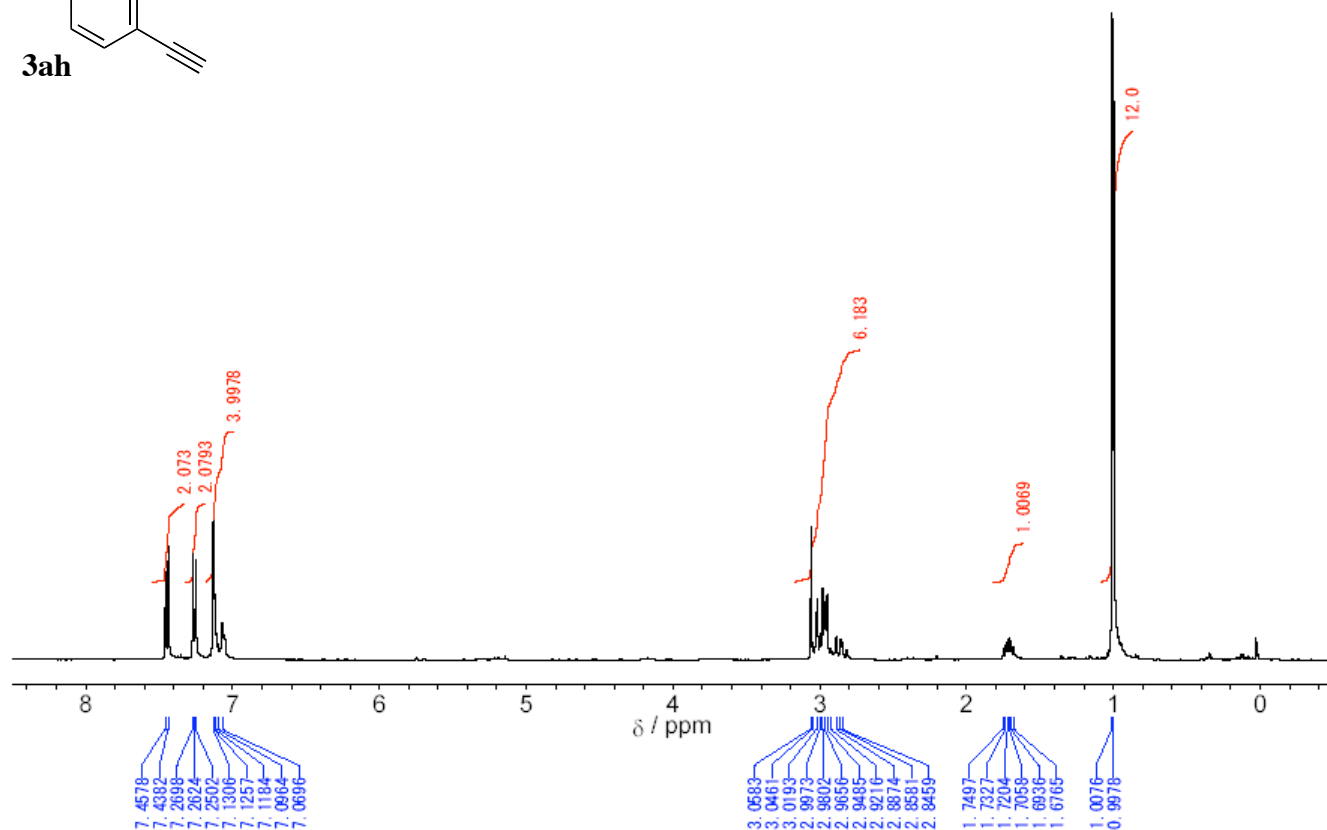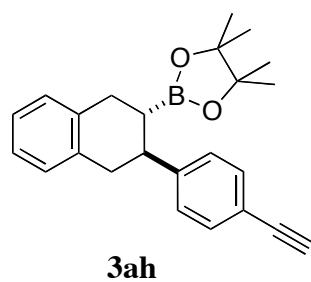

<sup>13</sup>C

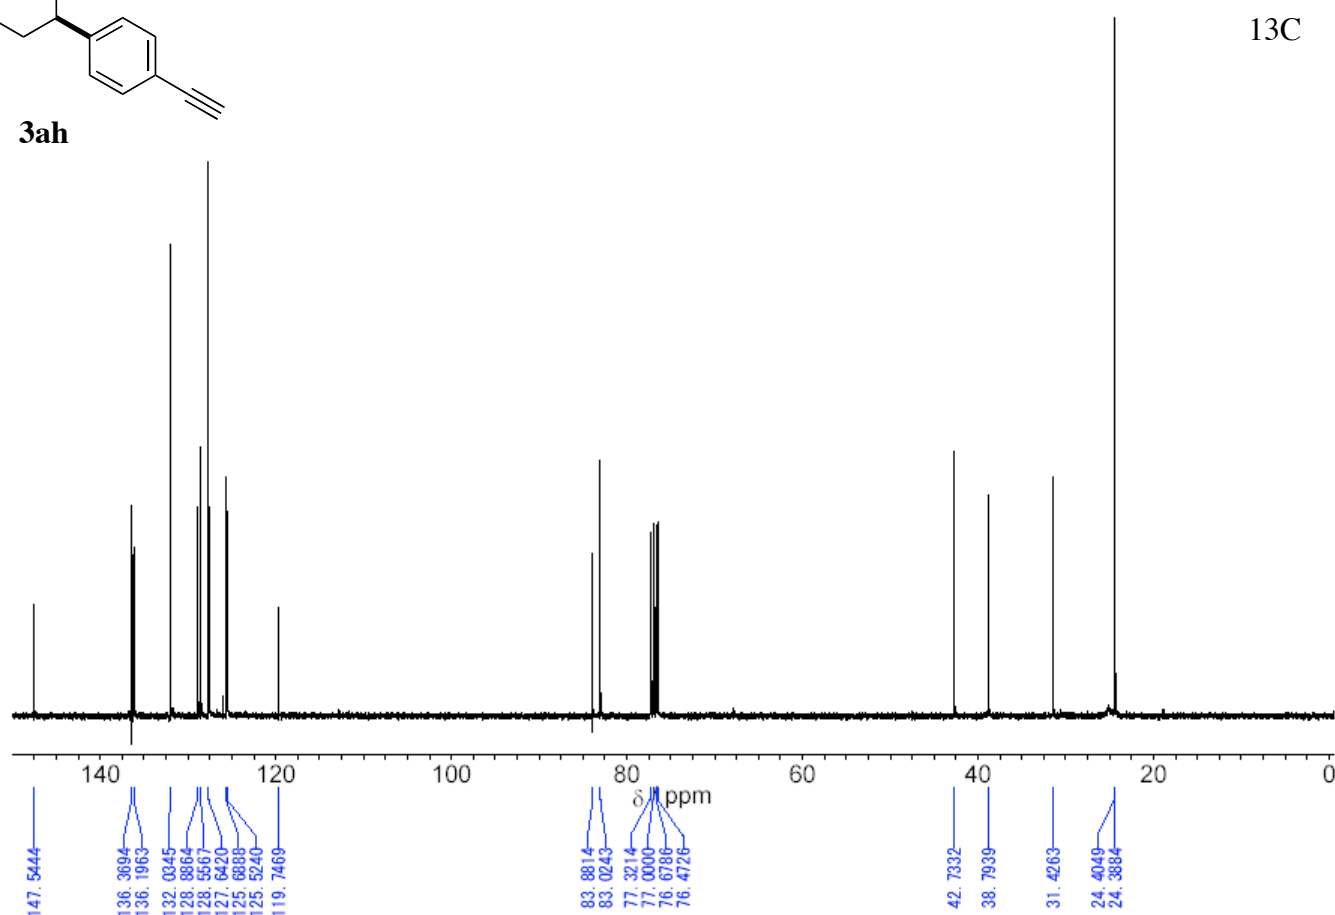



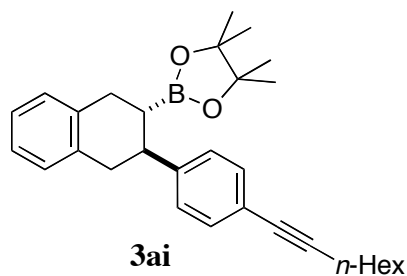

<sup>1</sup>H

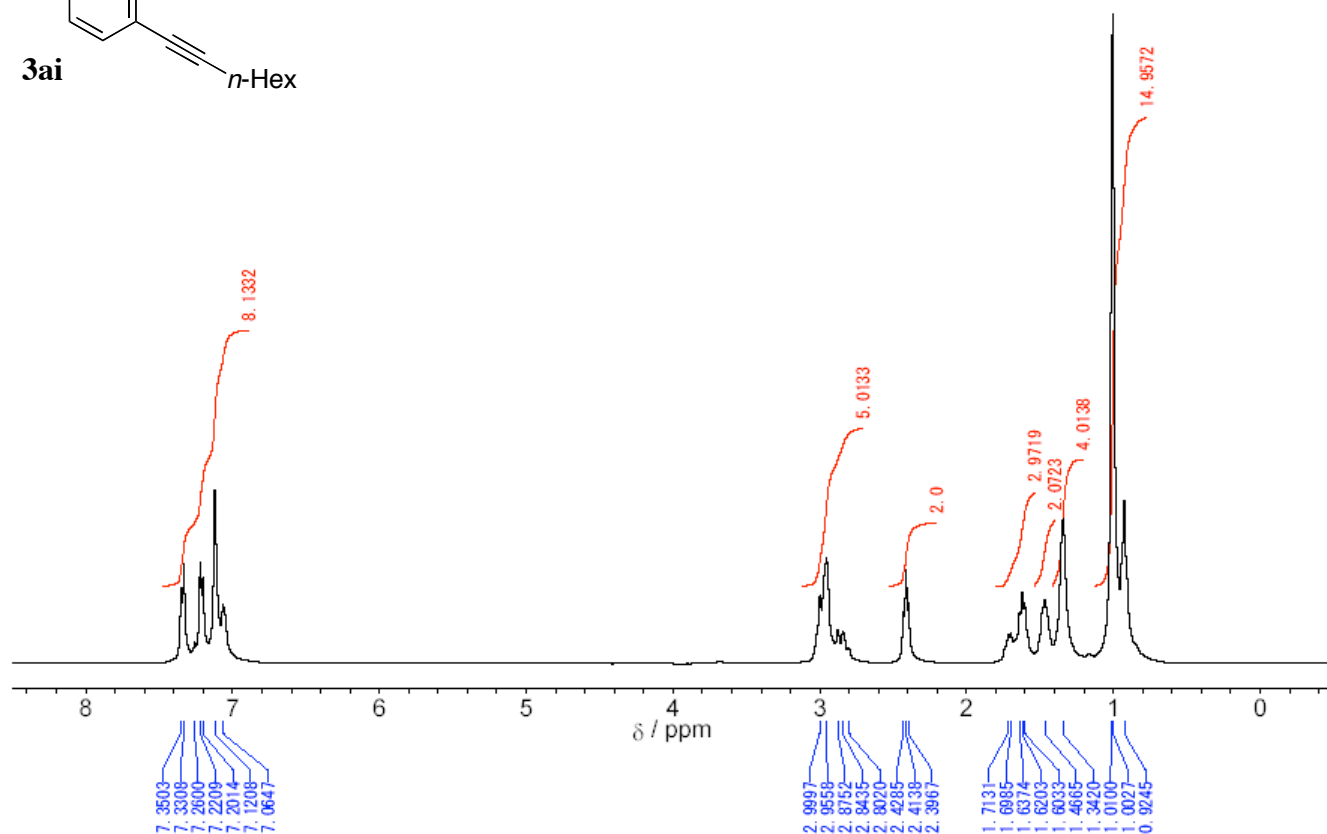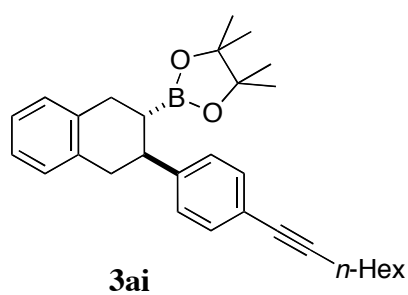

<sup>13</sup>C

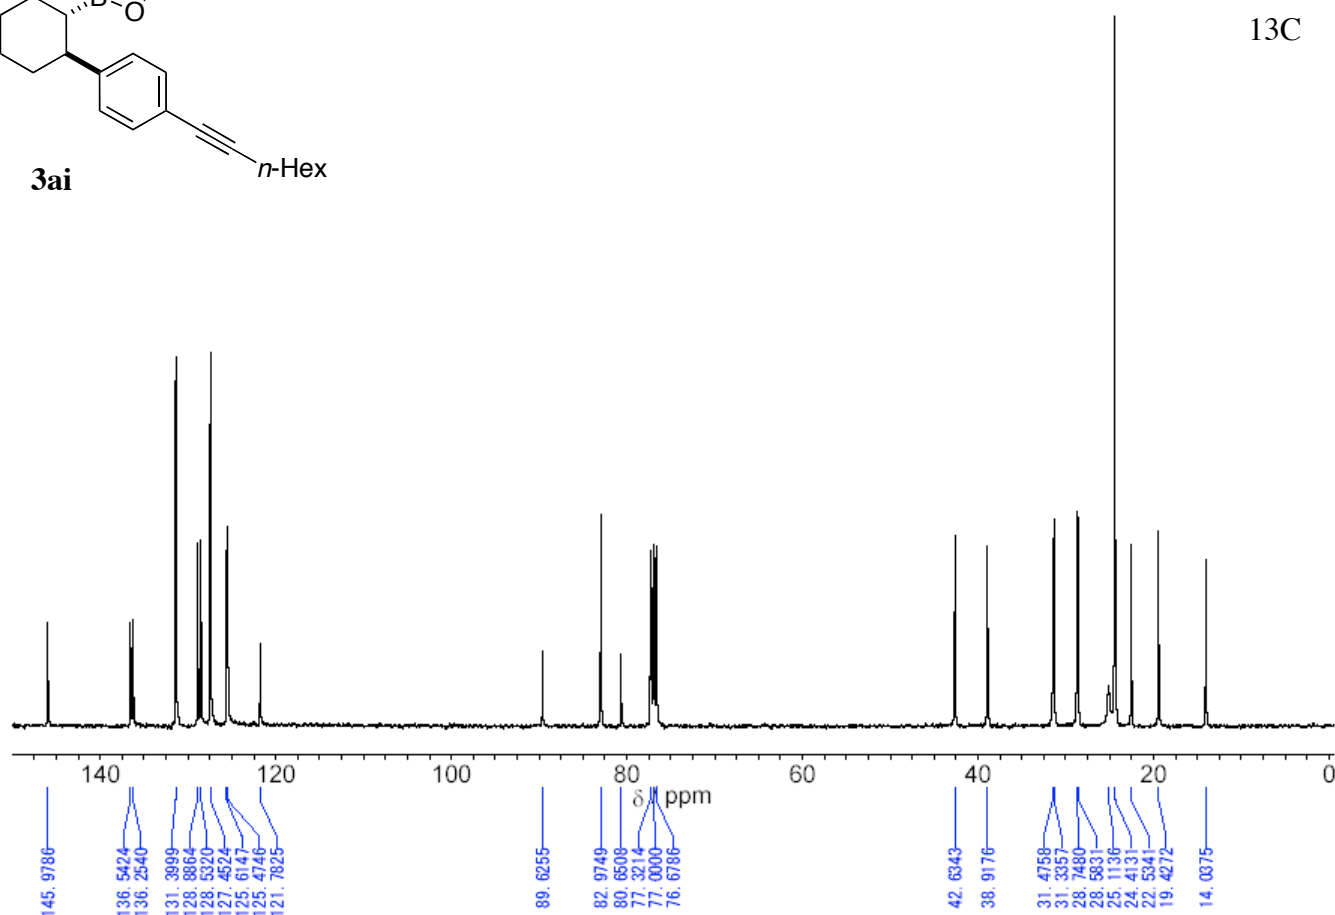

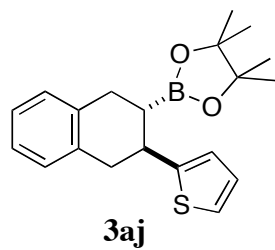

<sup>1</sup>H

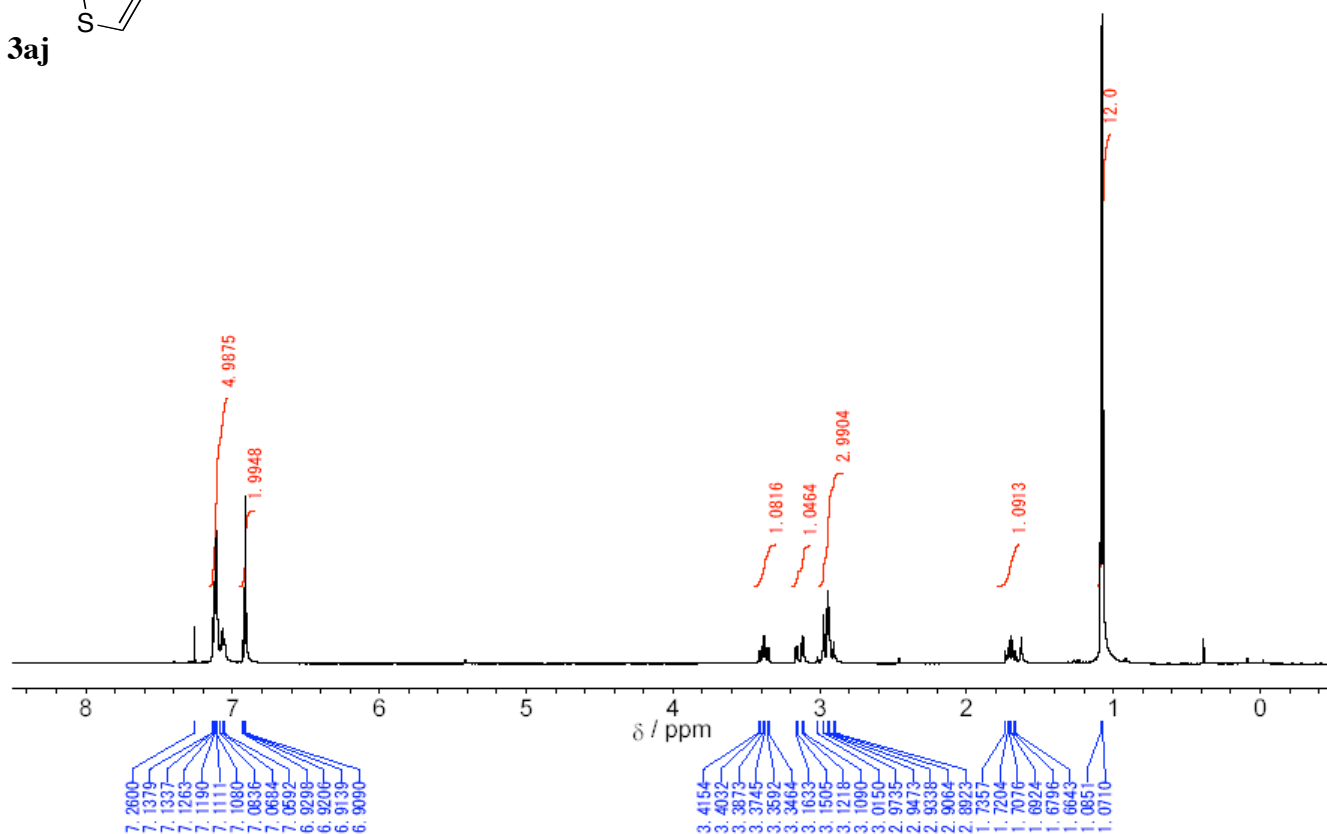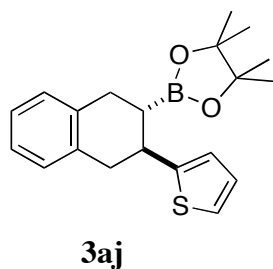

<sup>13</sup>C

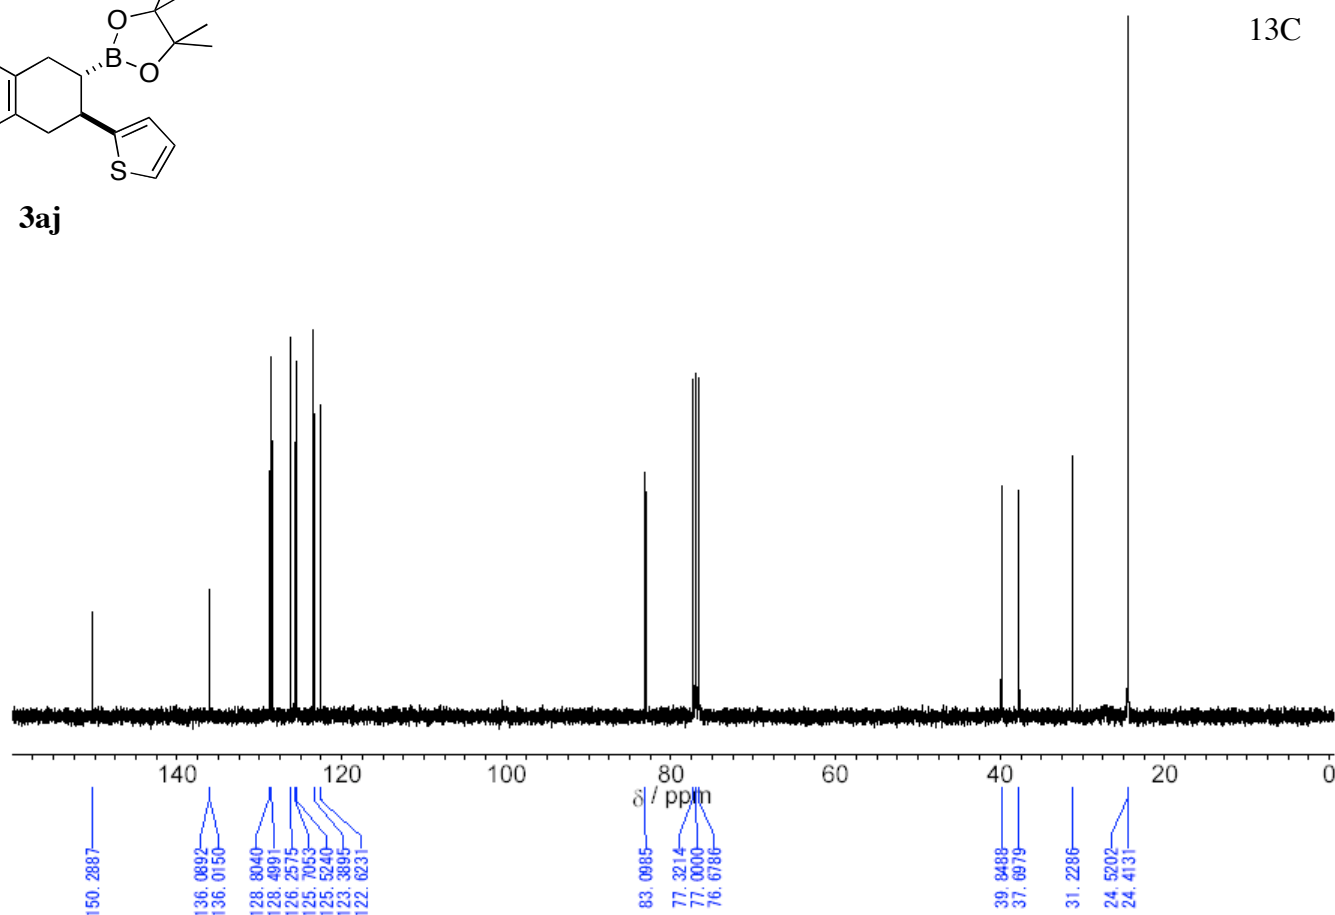

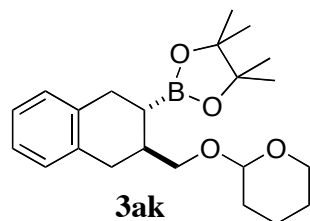

<sup>1</sup>H

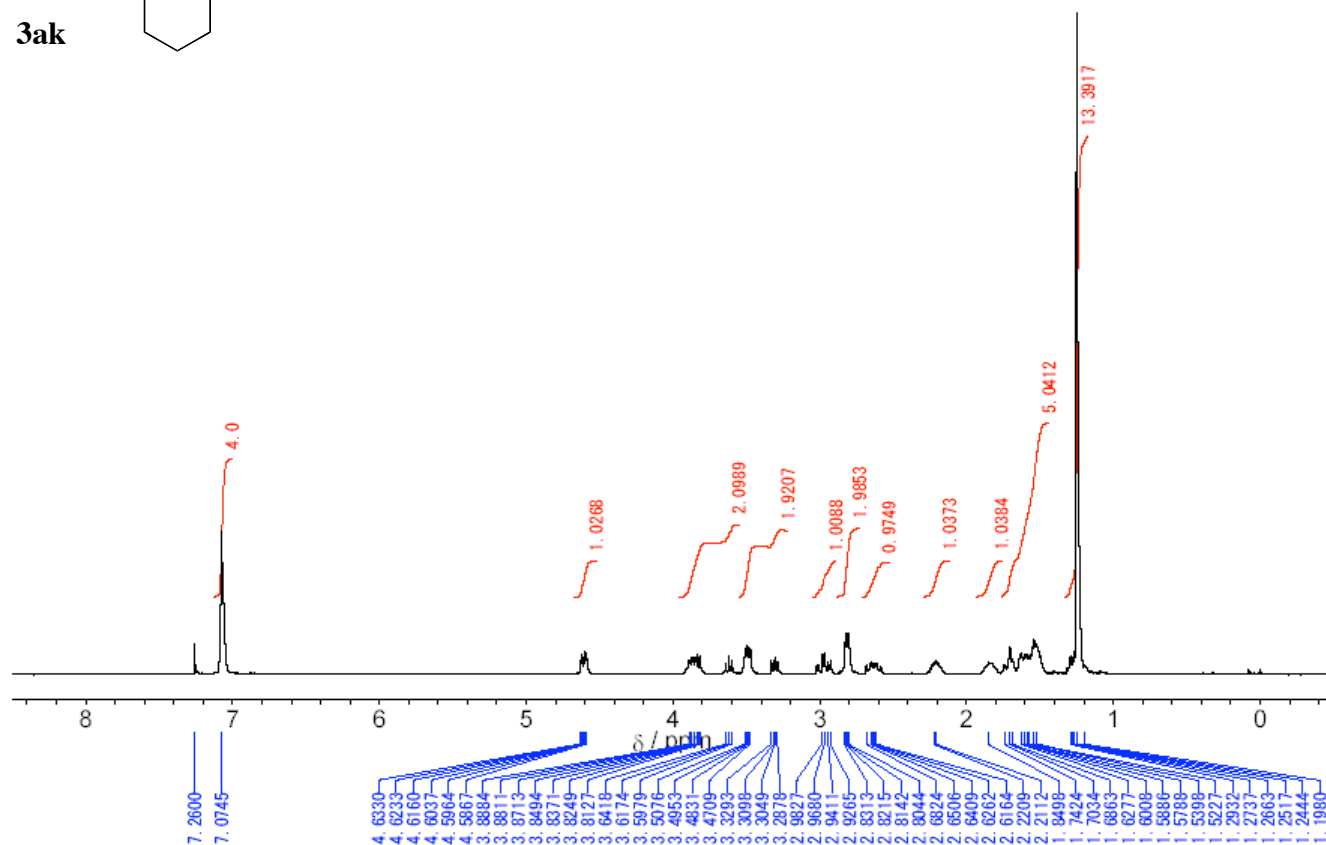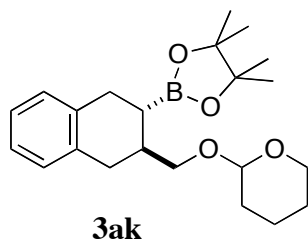

<sup>13</sup>C

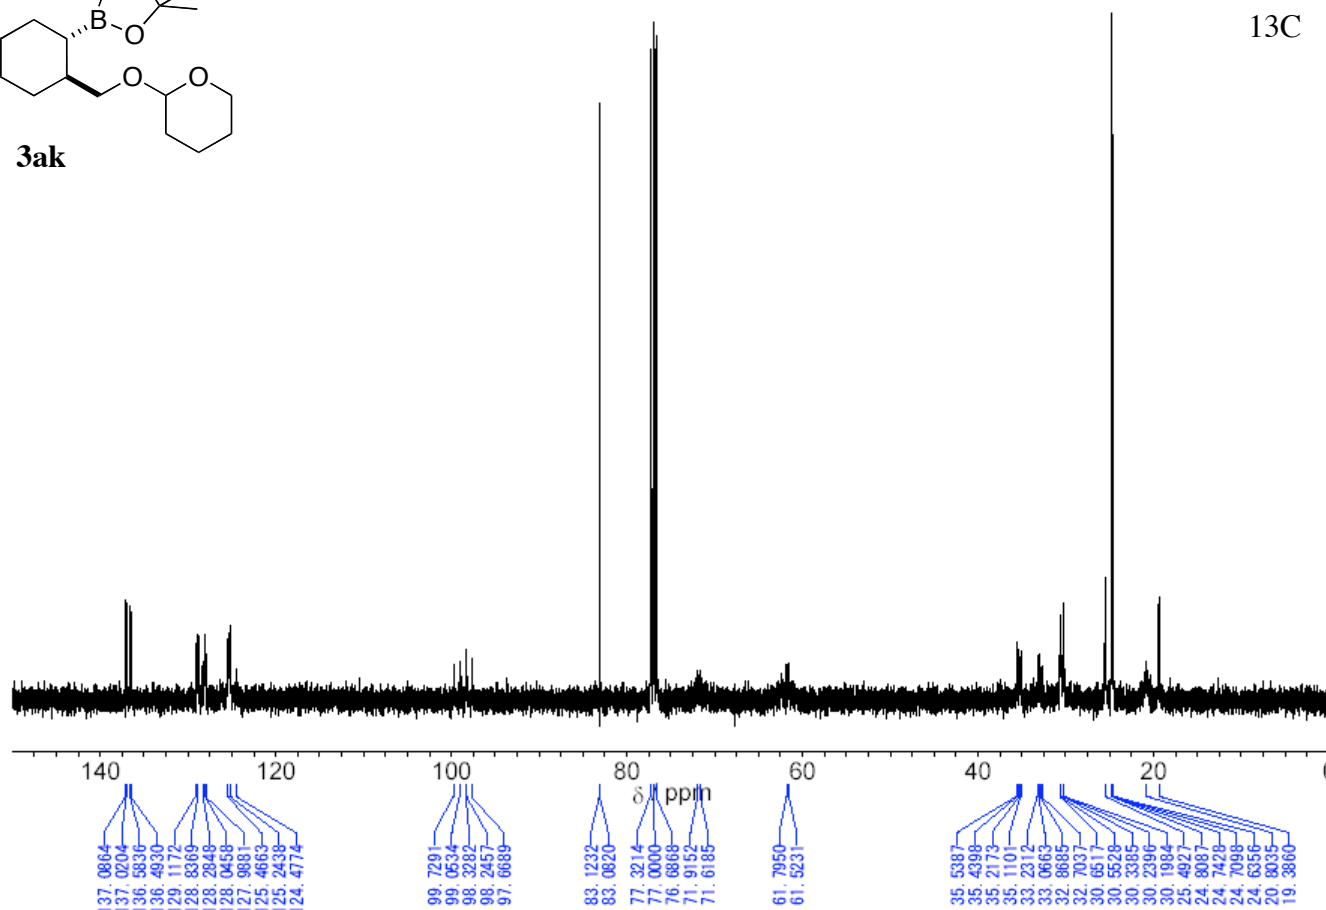

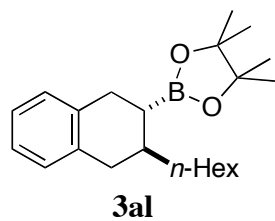

<sup>1</sup>H

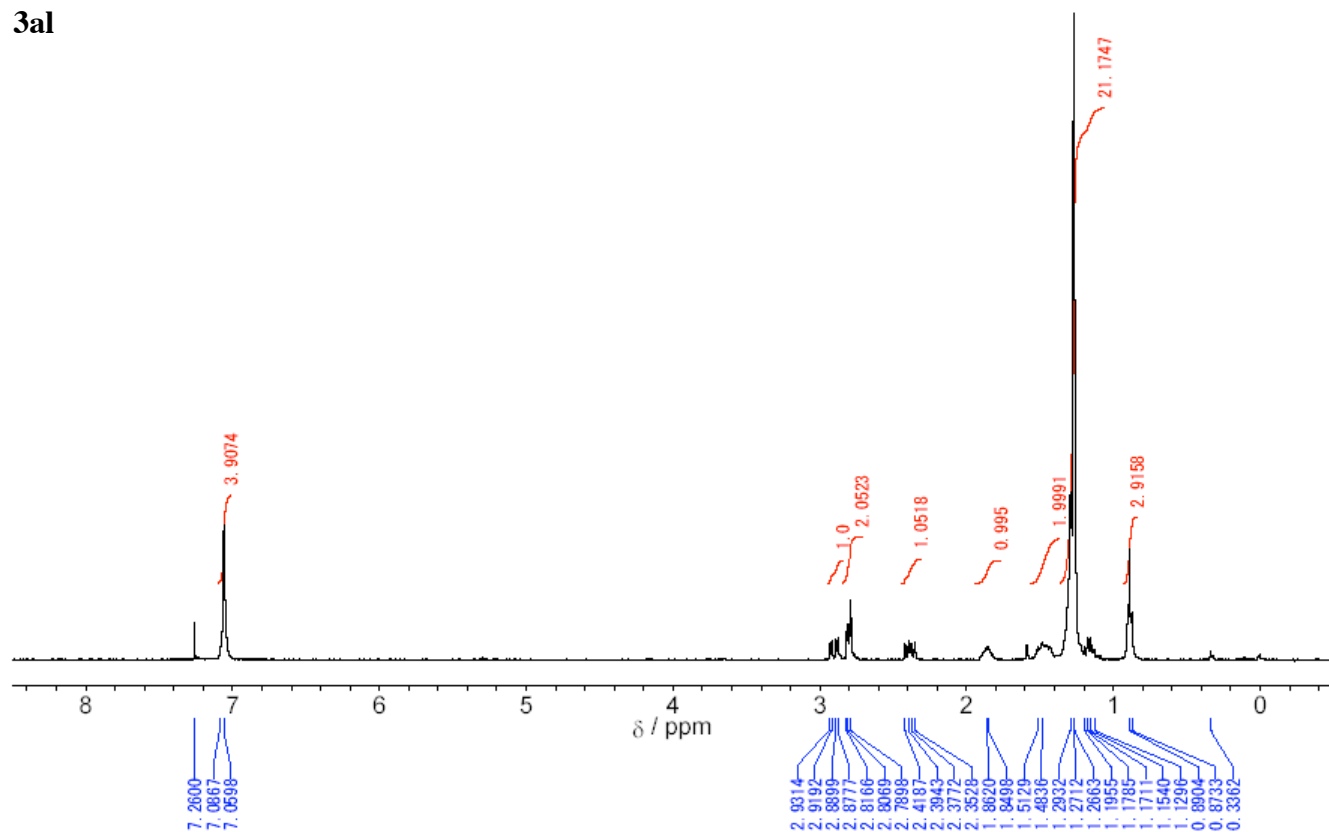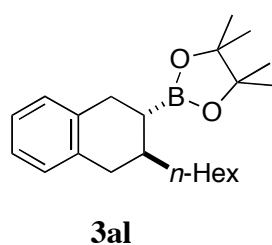

<sup>13</sup>C

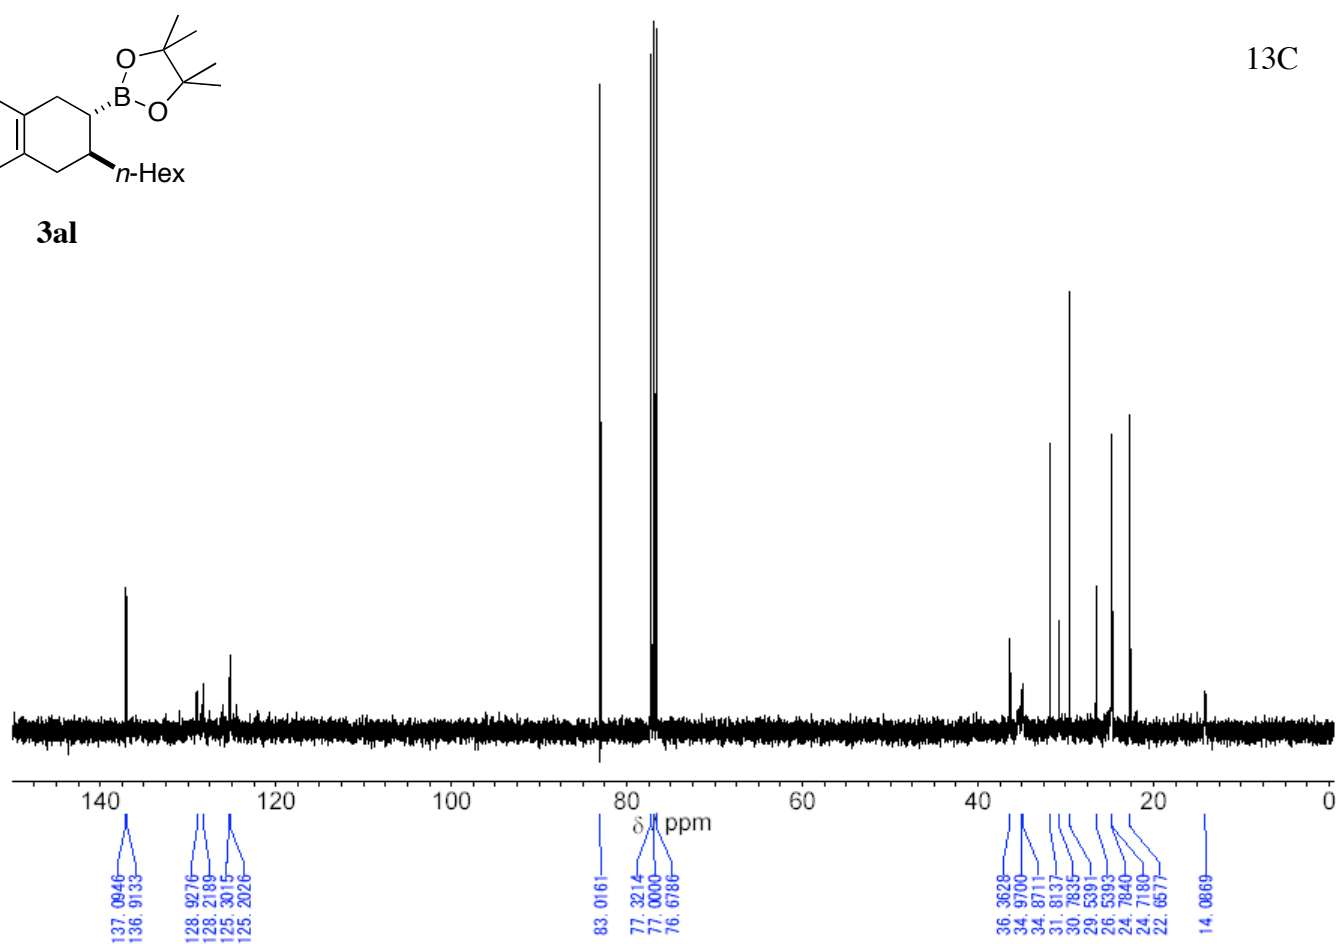

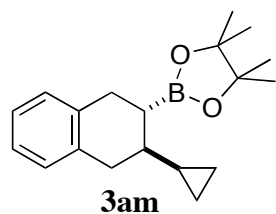

<sup>1</sup>H

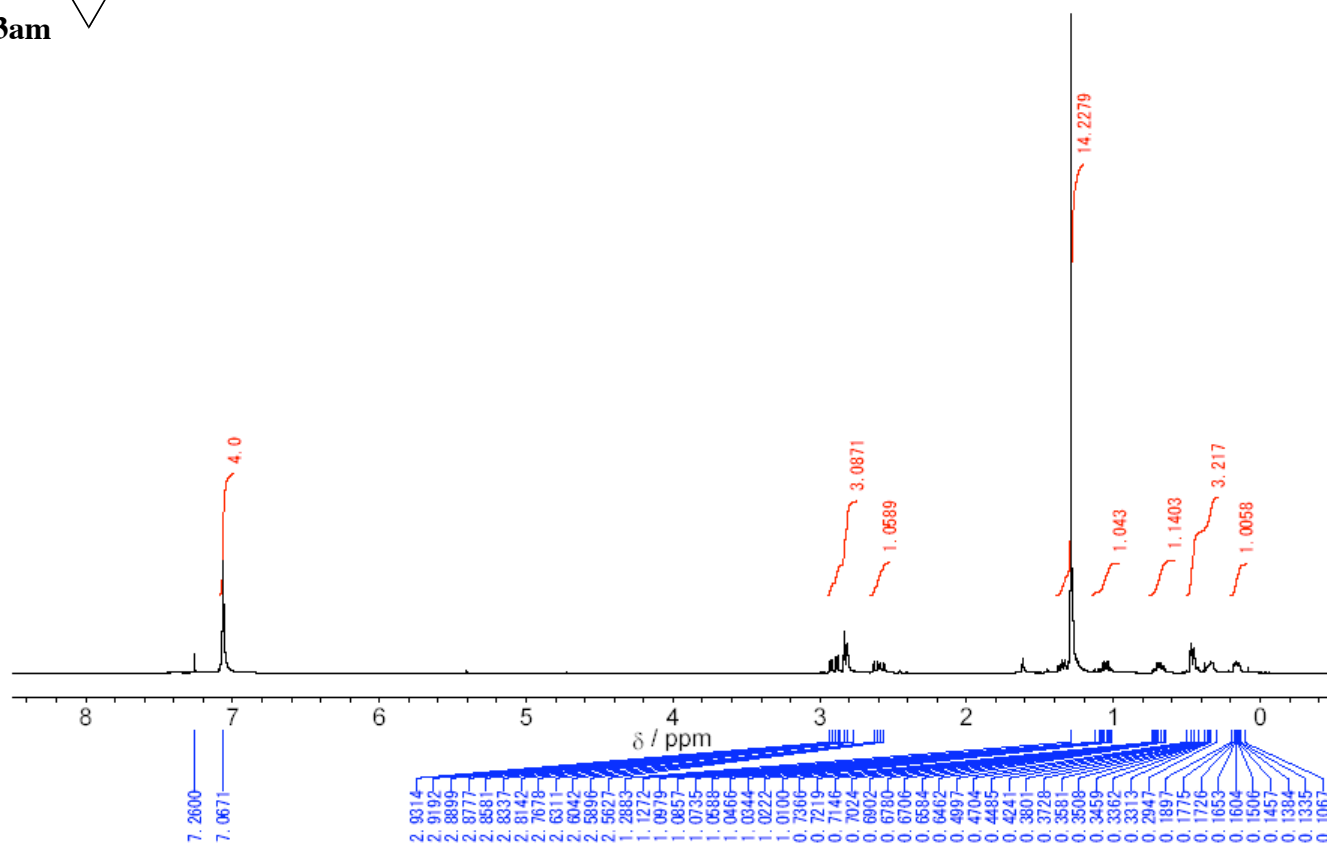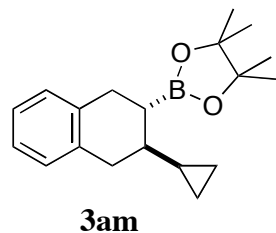

<sup>13</sup>C

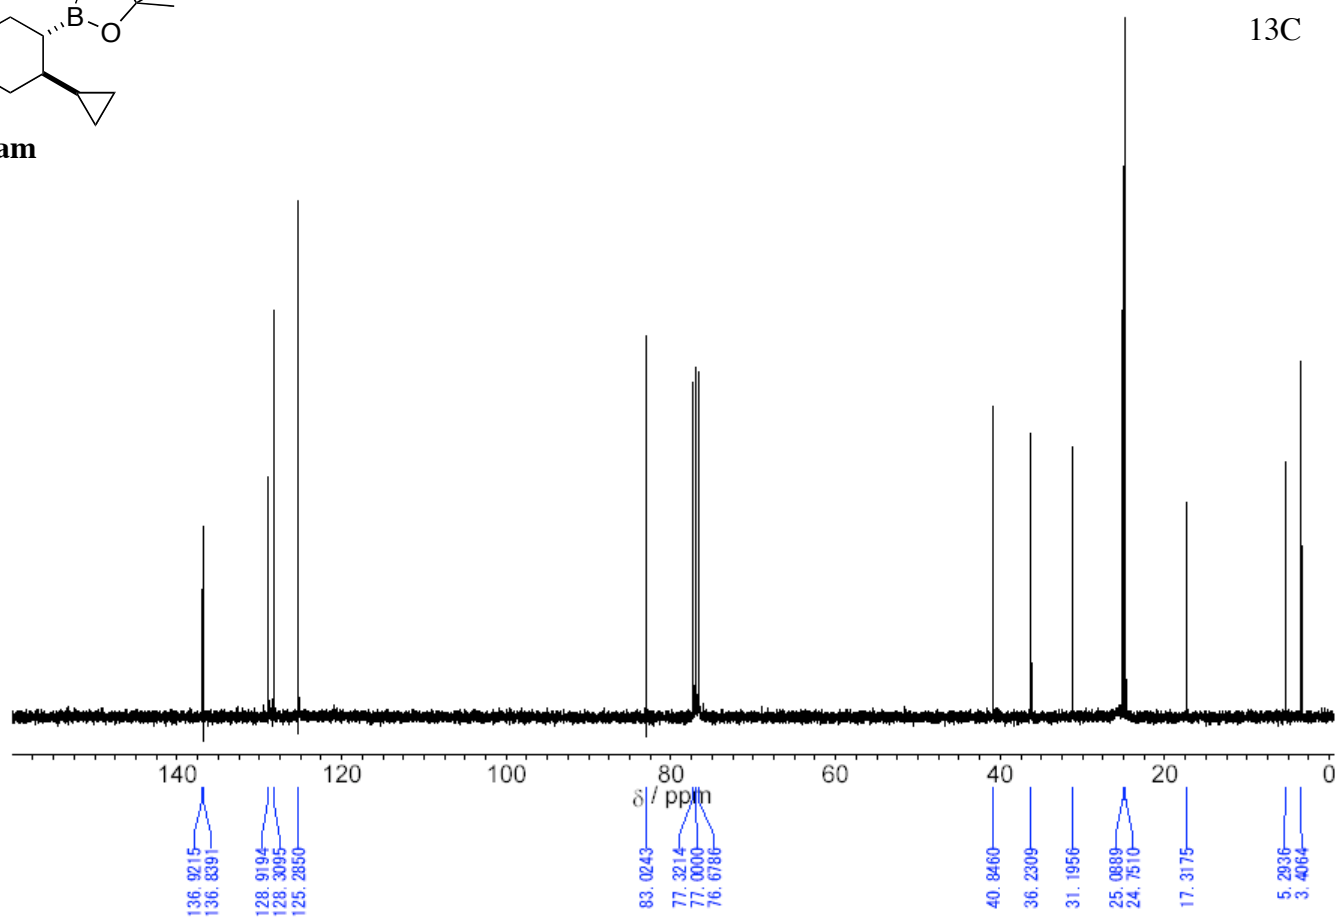

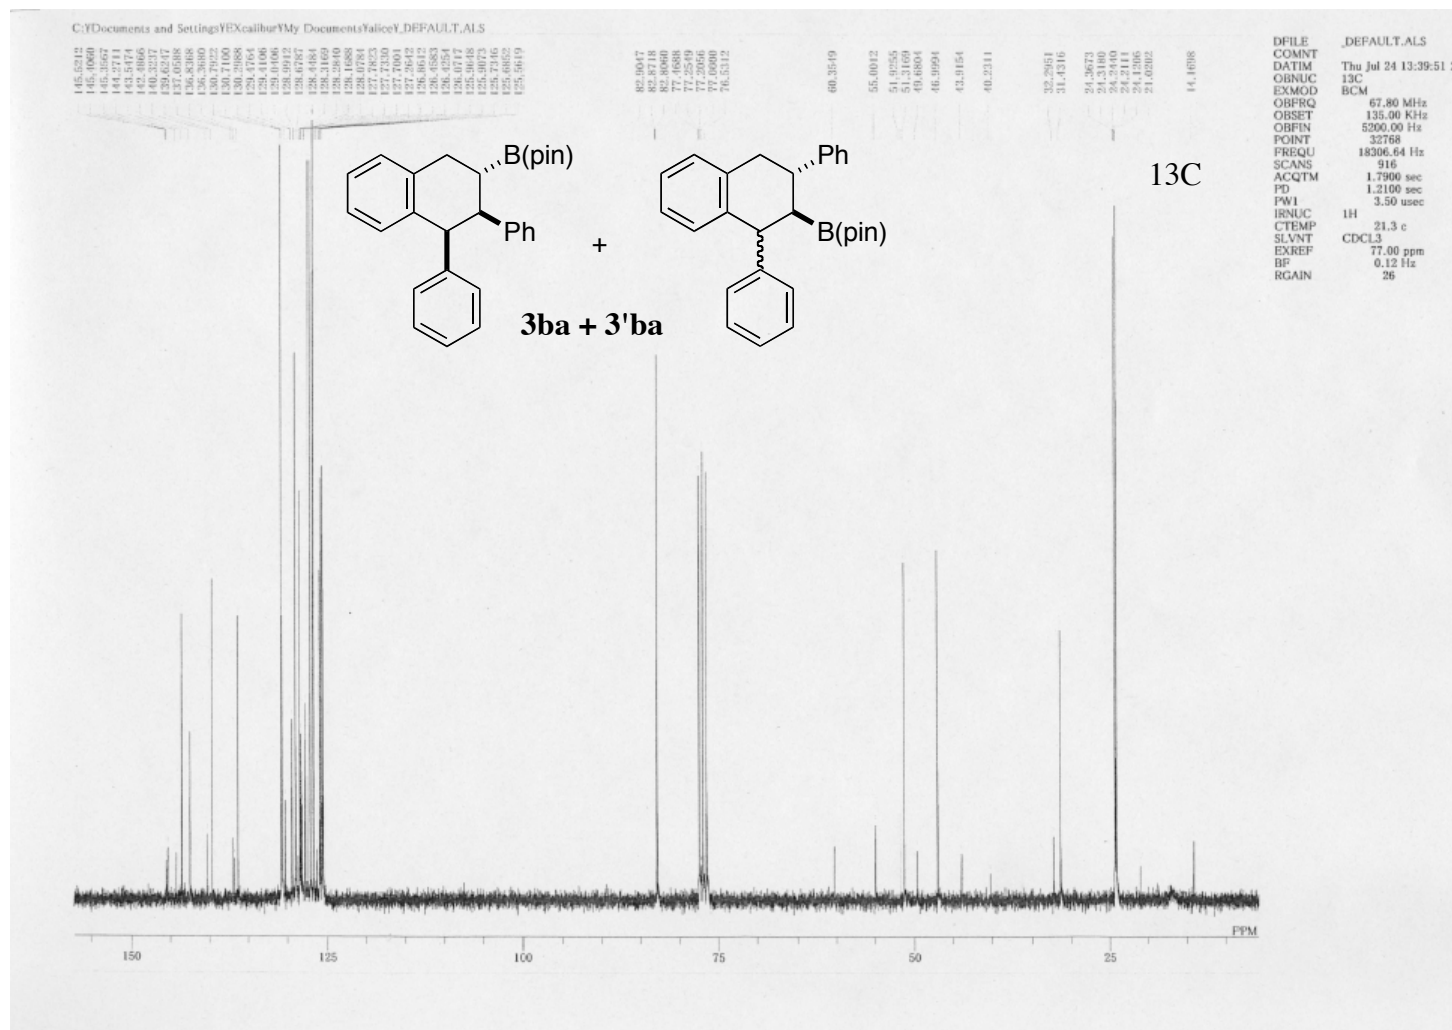

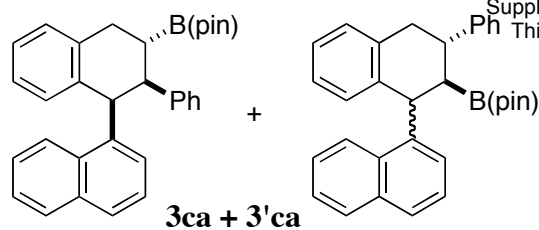

<sup>1</sup>H

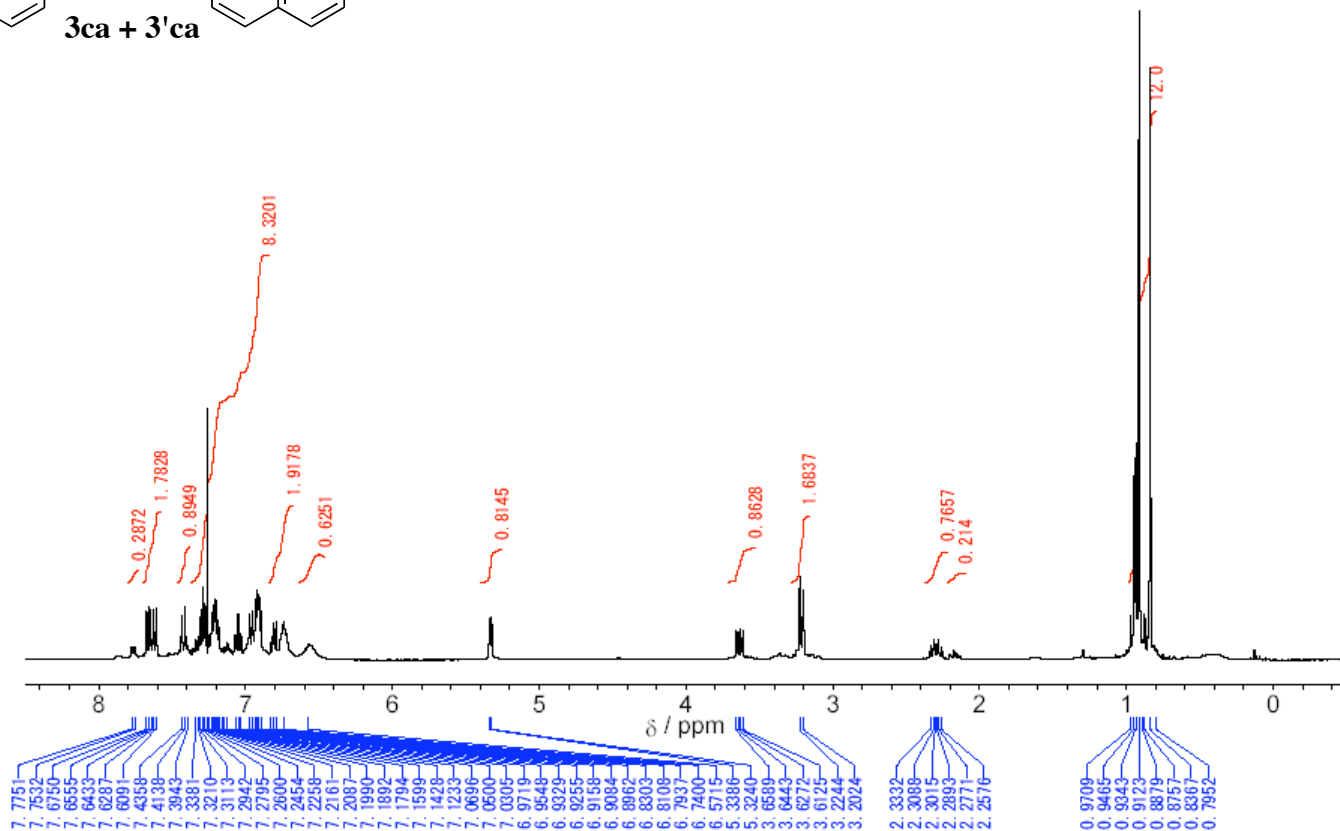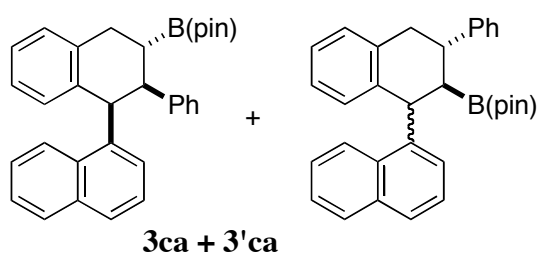

<sup>13</sup>C

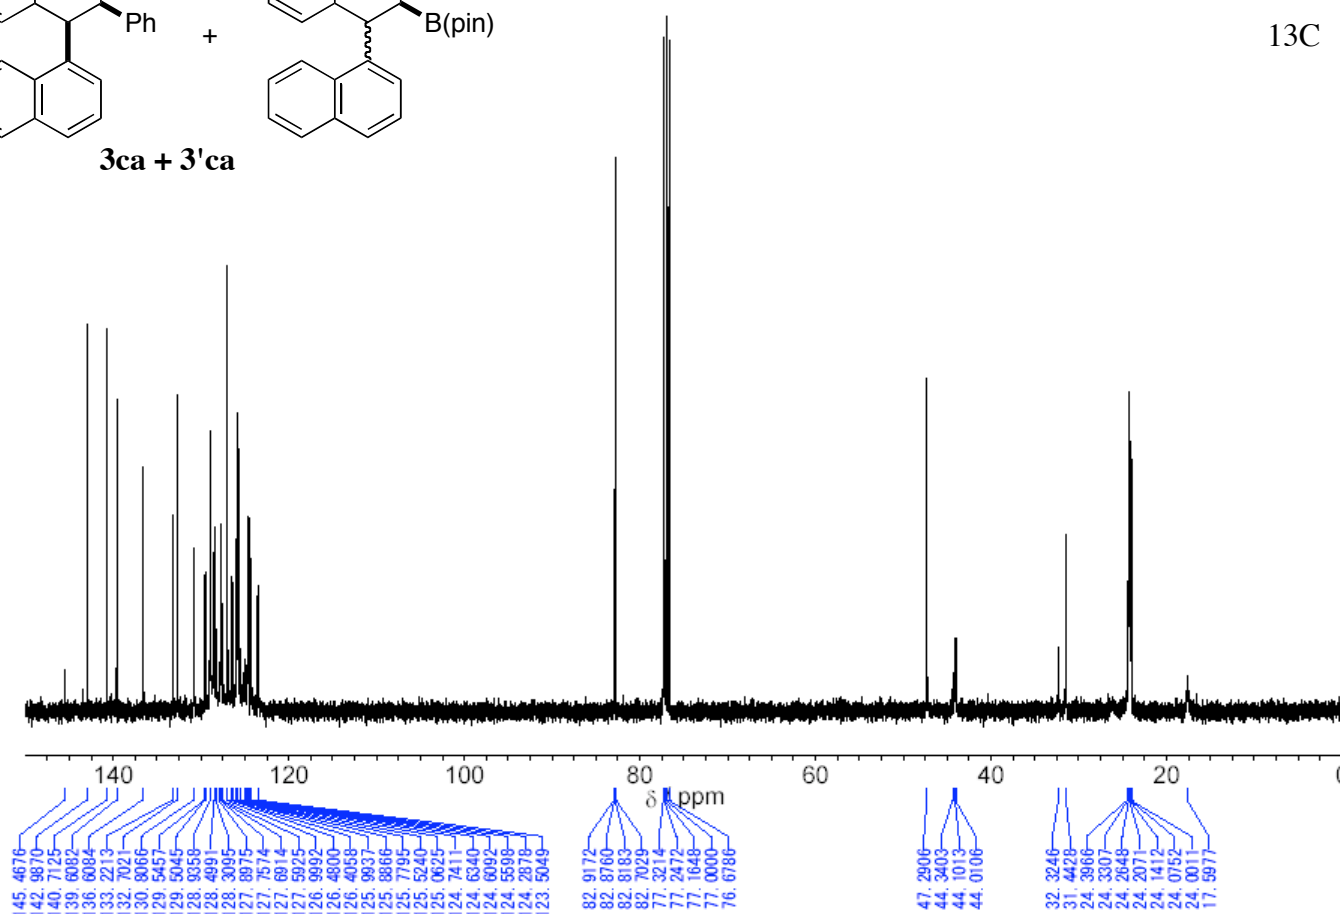

<sup>1</sup>H

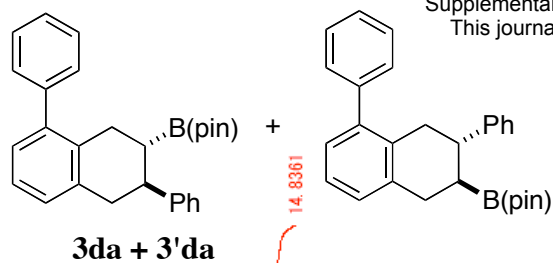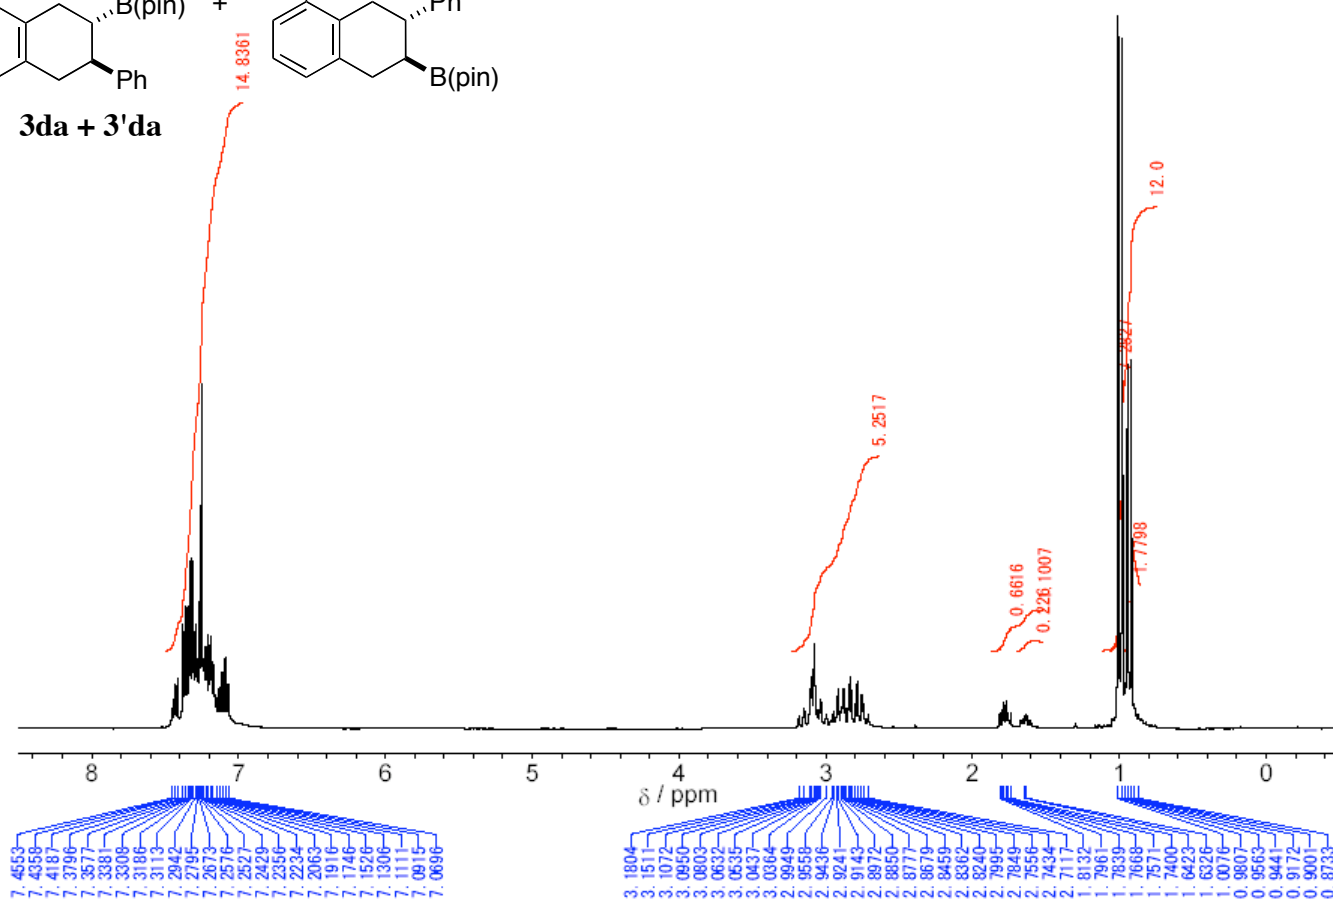

<sup>13</sup>C

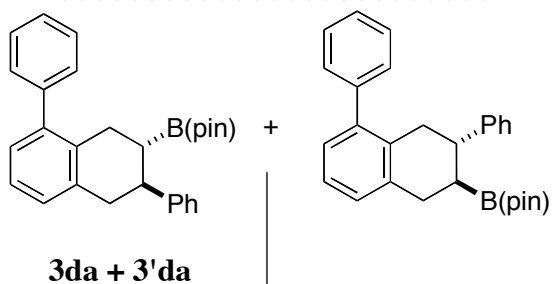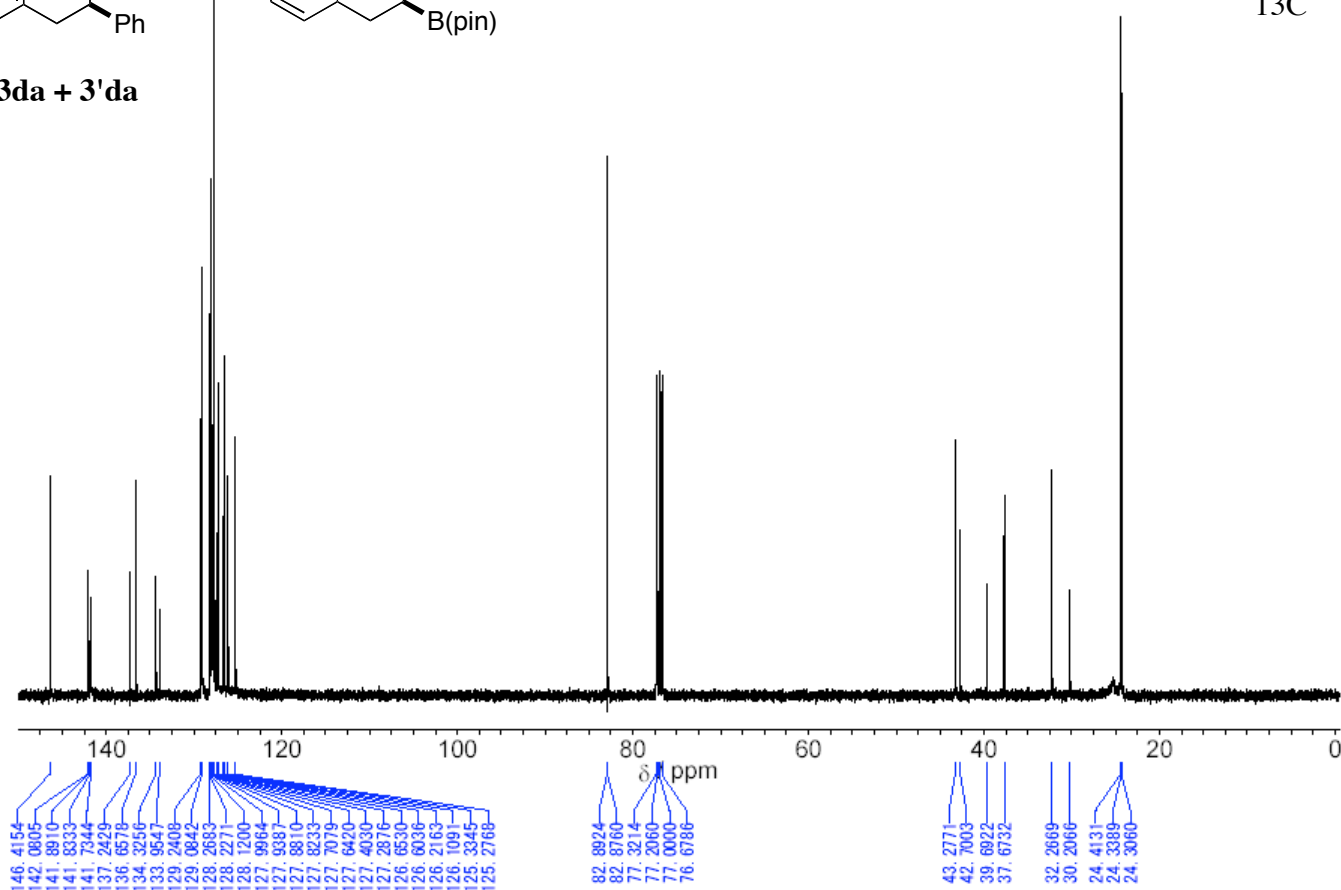



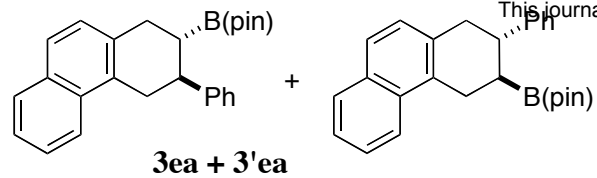

<sup>1</sup>H

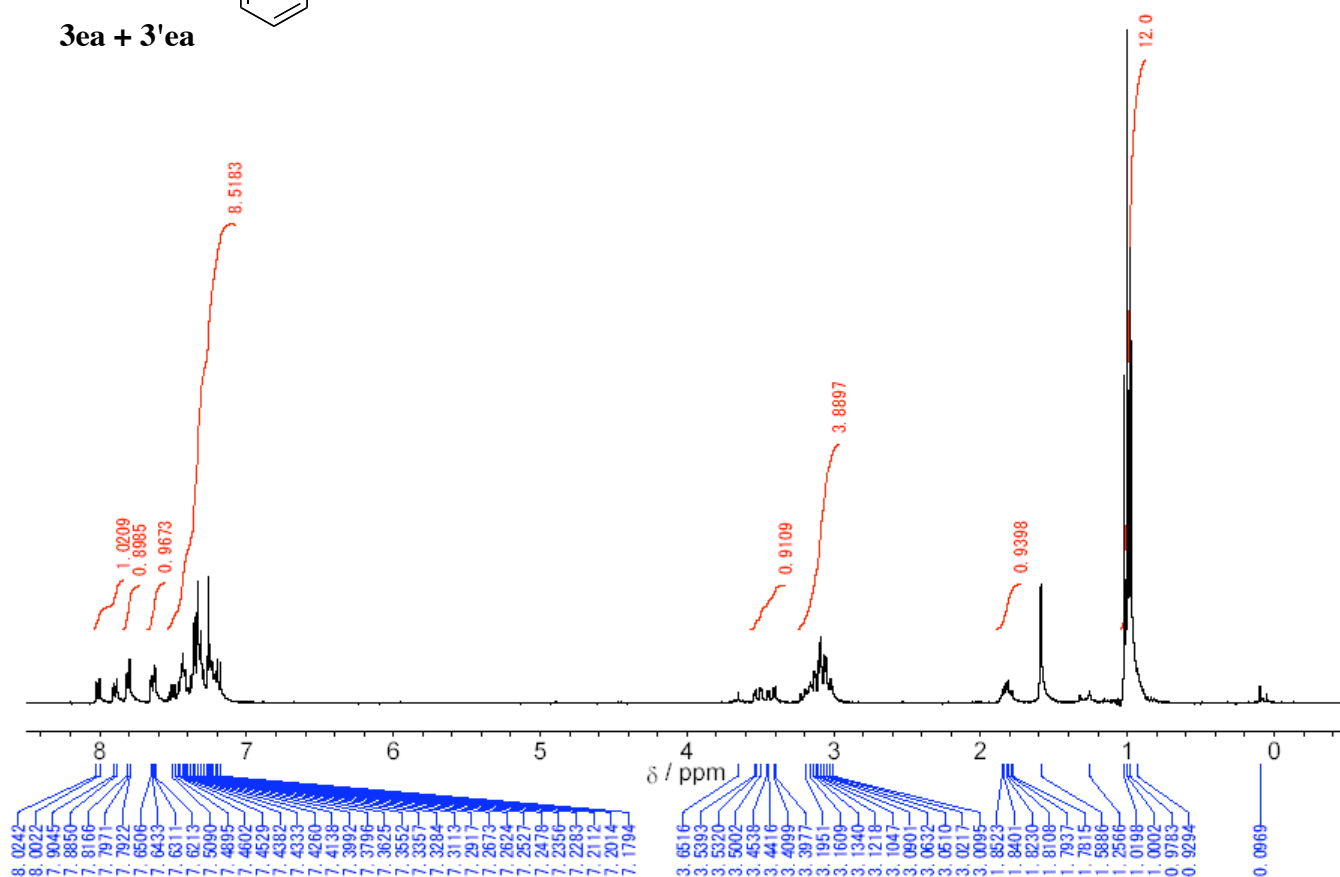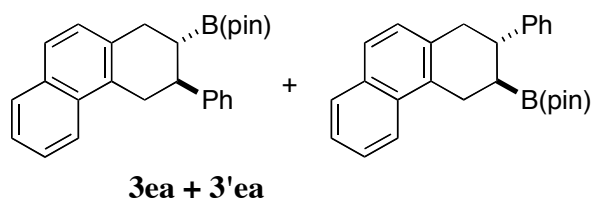

<sup>13</sup>C

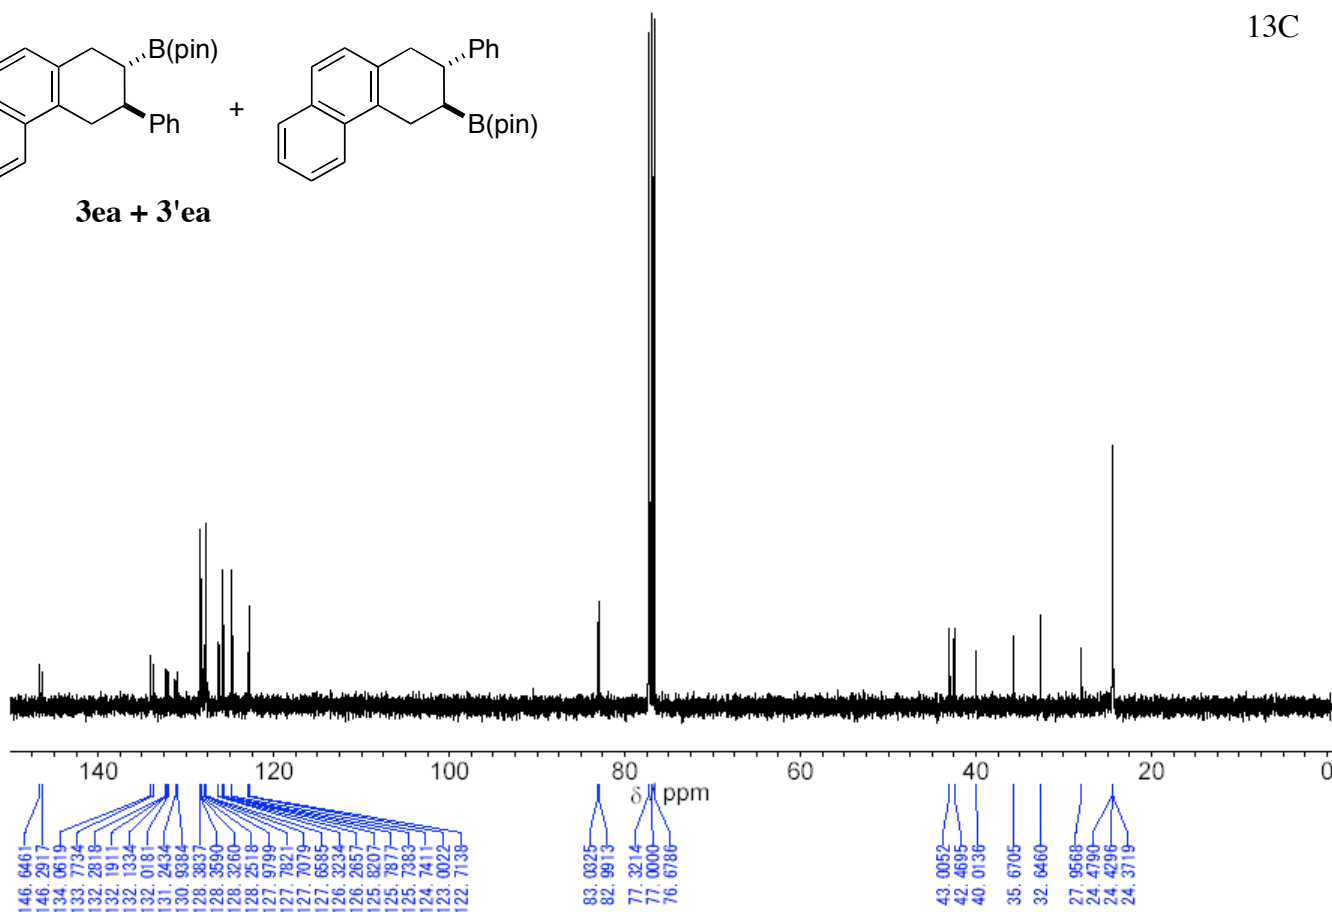

**3bo**

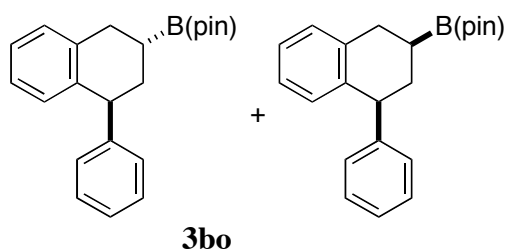

**3bo**

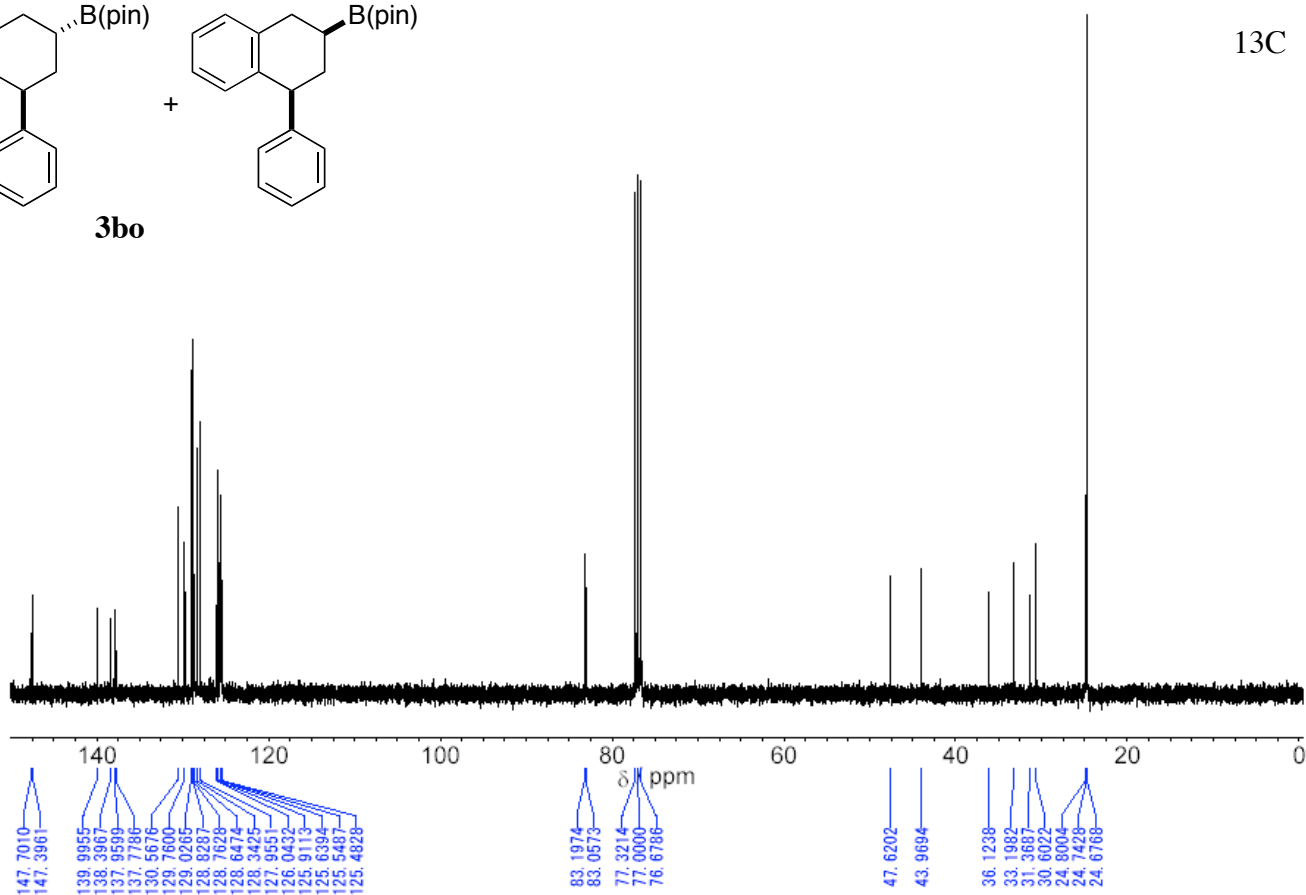

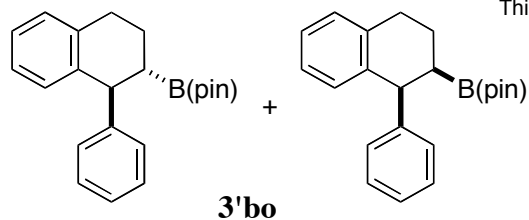

$^1\text{H}$

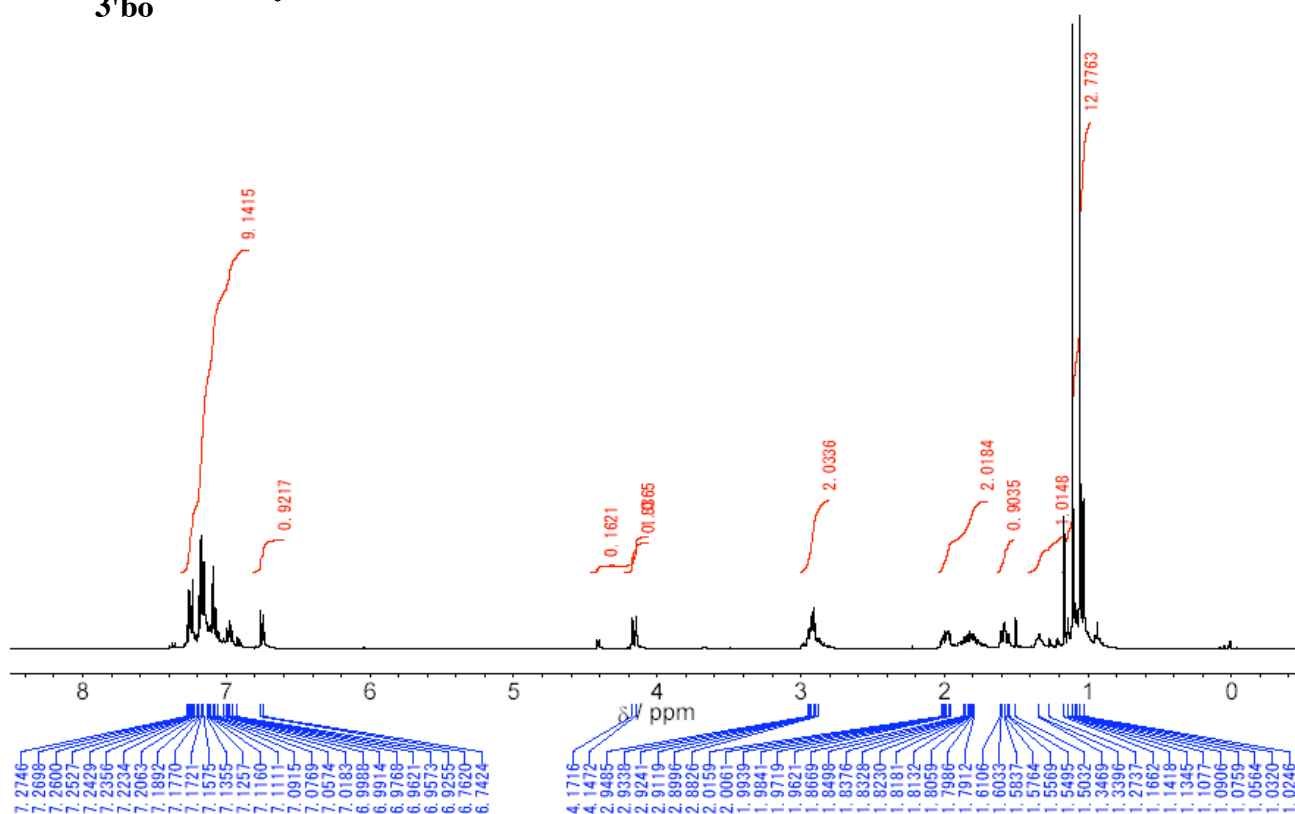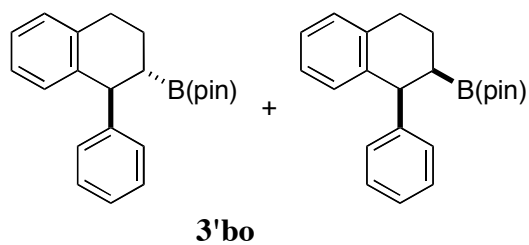

$^{13}\text{C}$

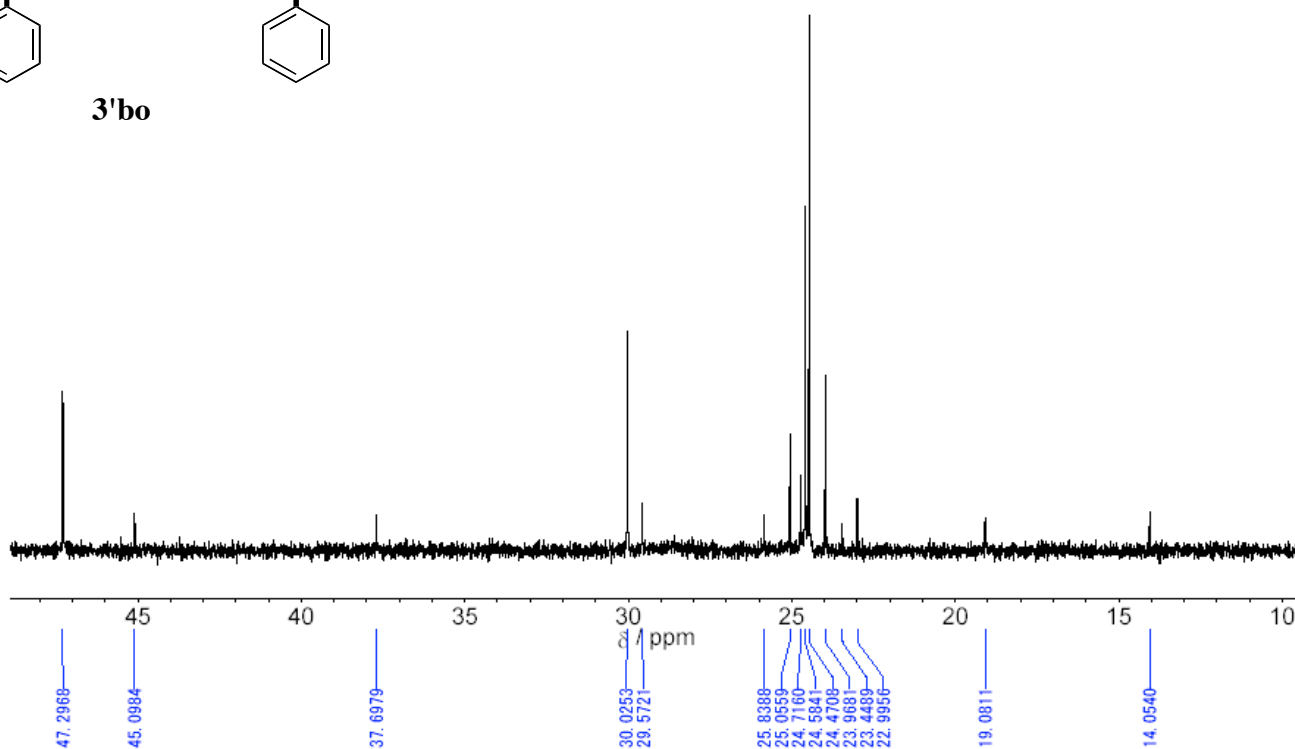

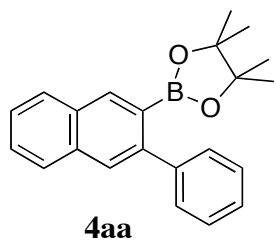

<sup>1</sup>H

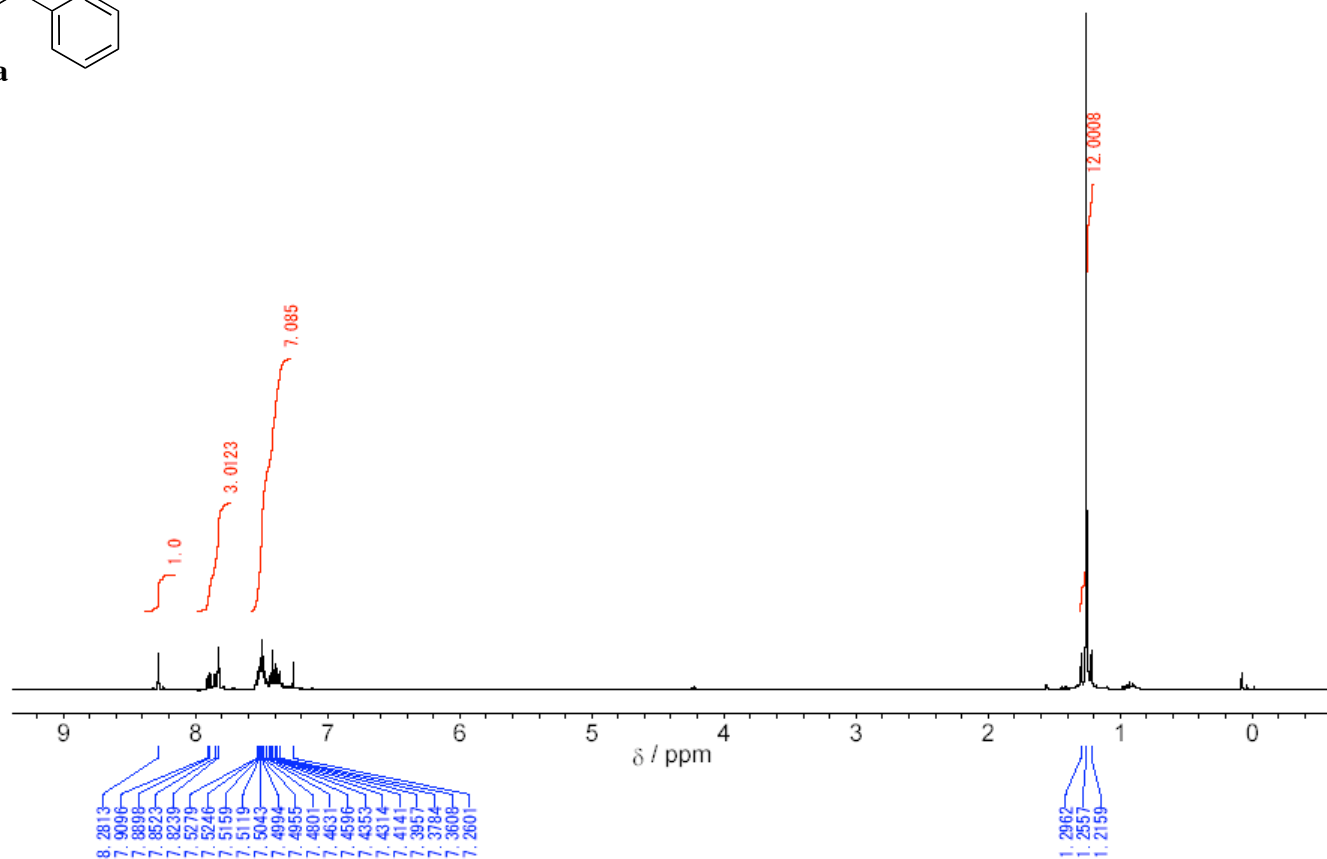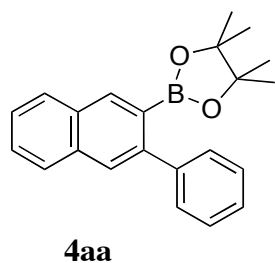

<sup>13</sup>C

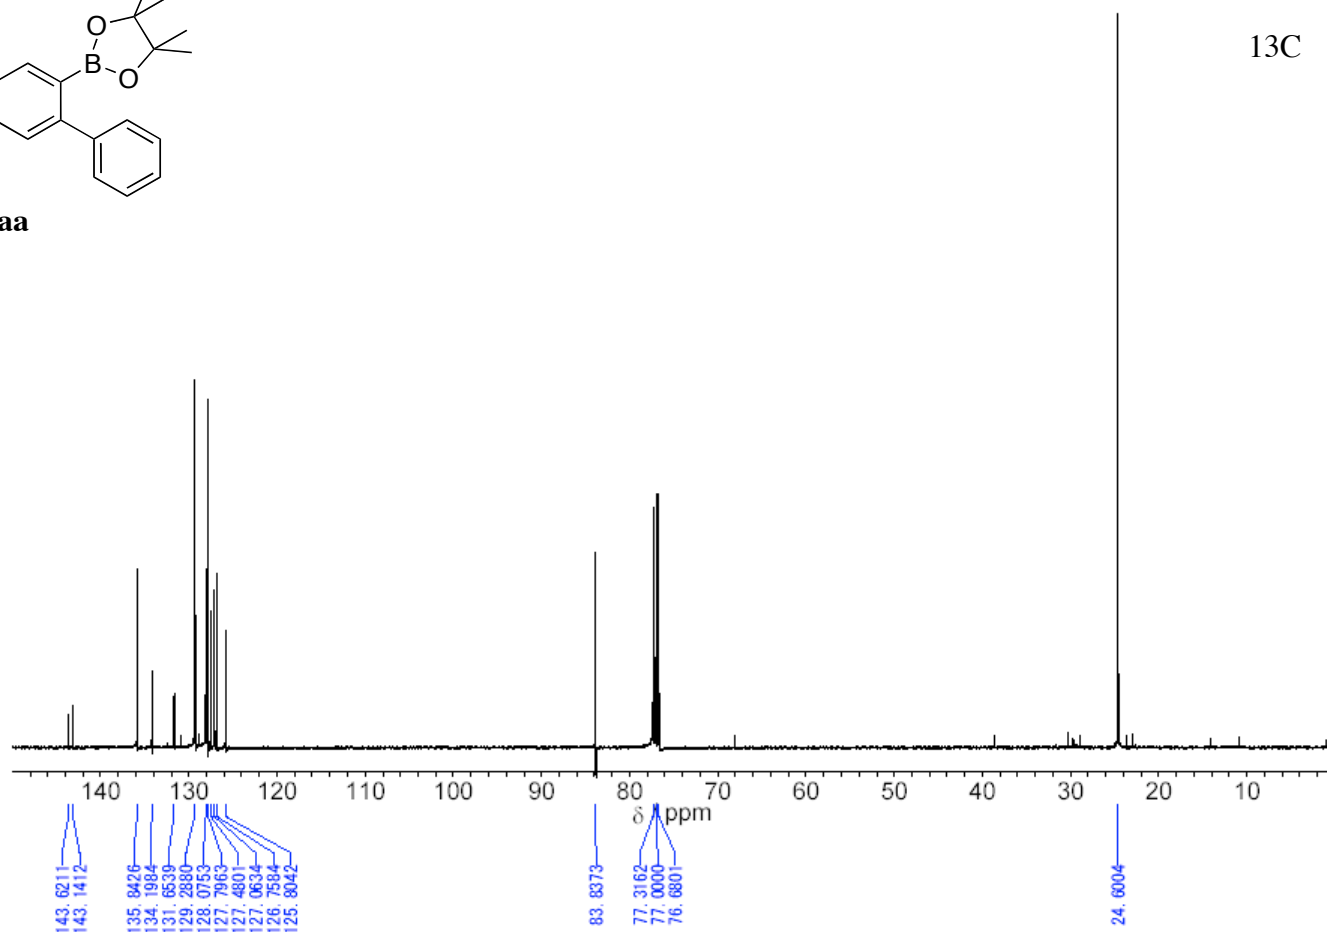

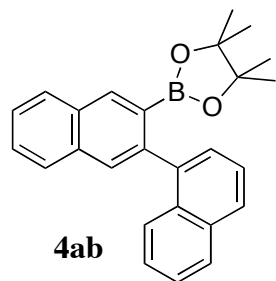

<sup>1</sup>H

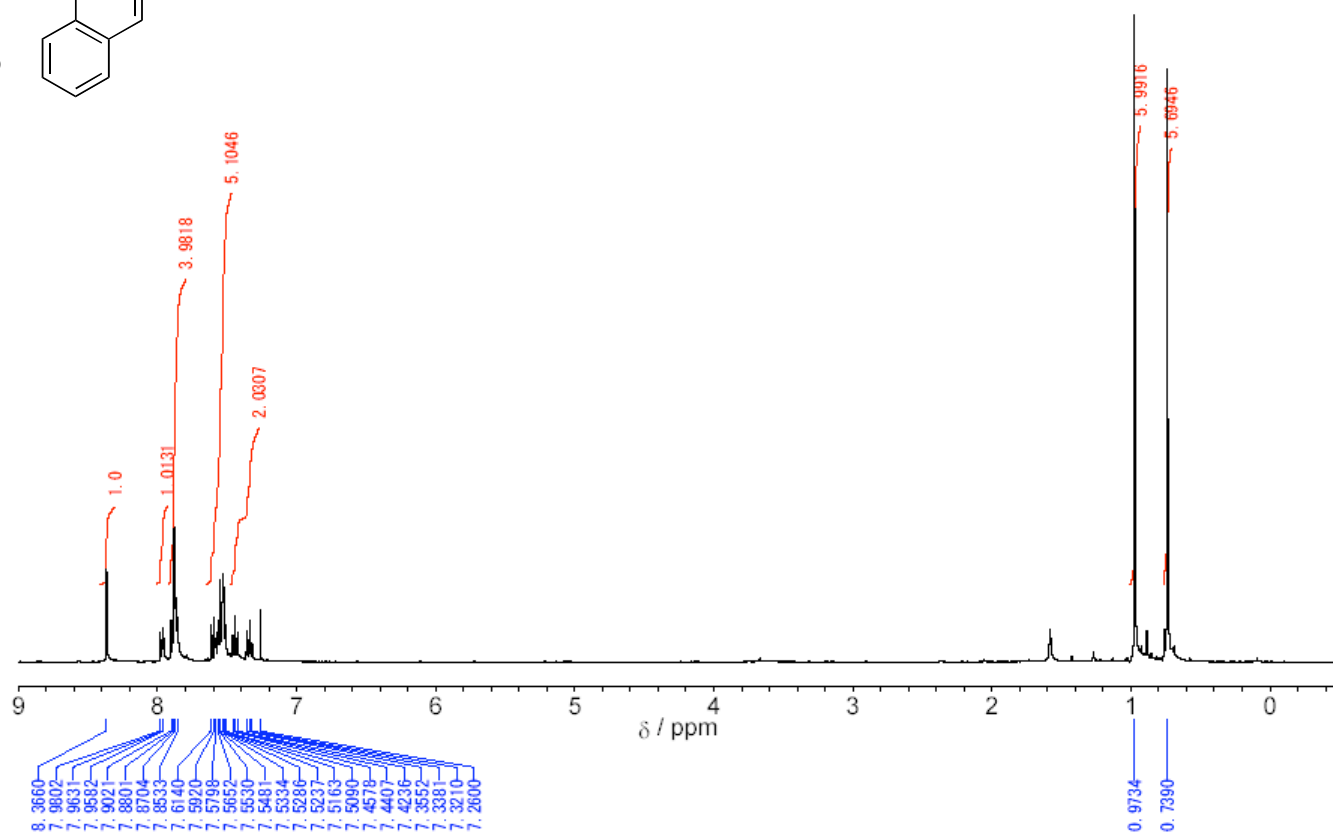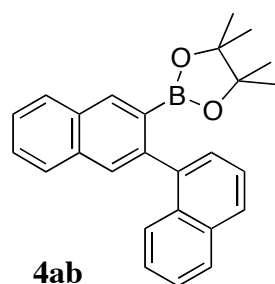

<sup>13</sup>C

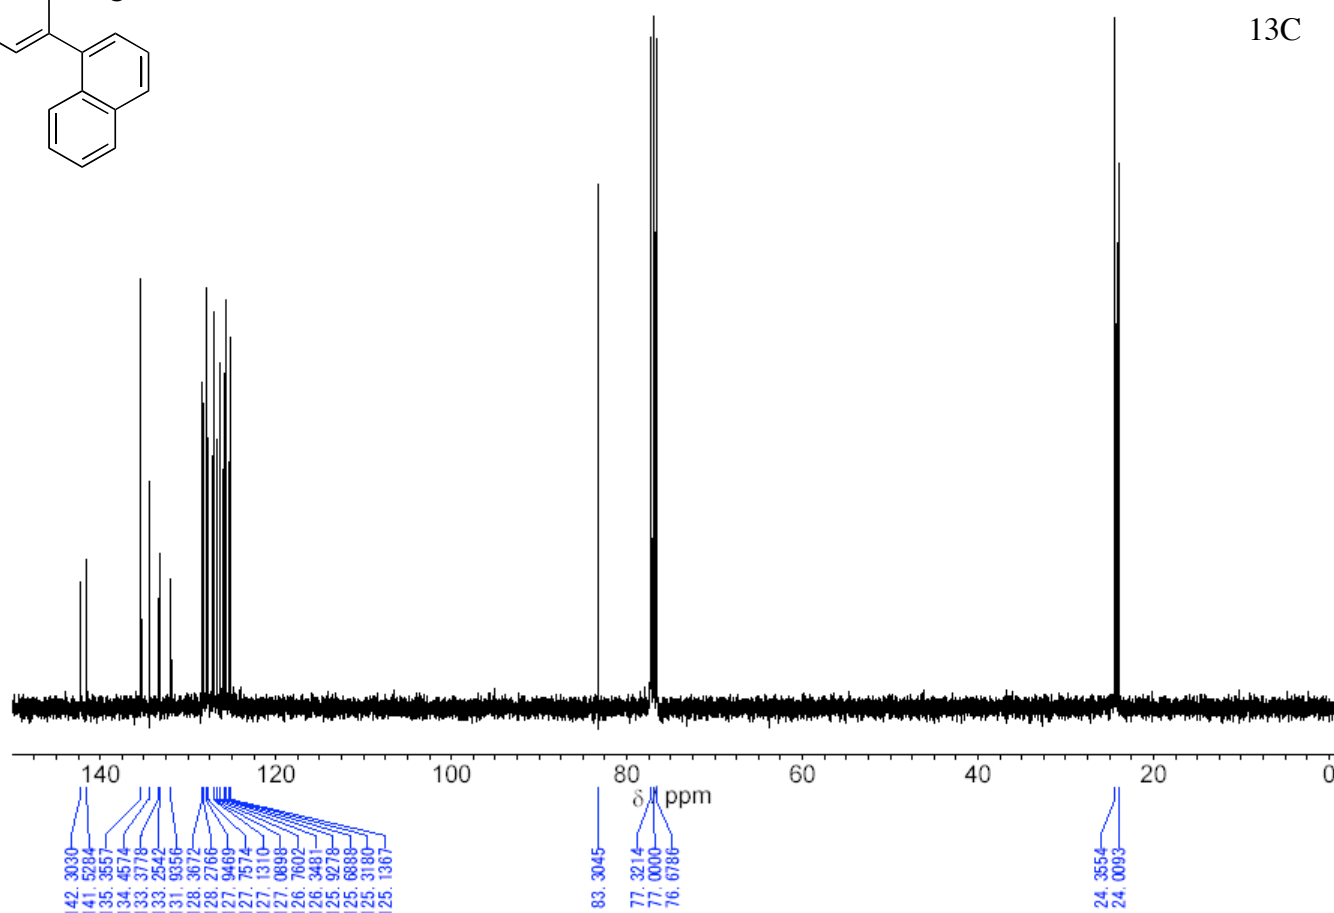

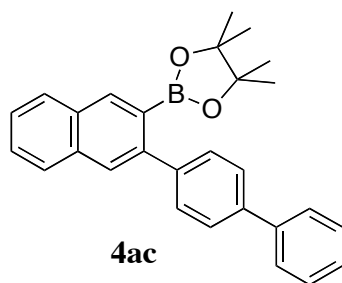

<sup>1</sup>H

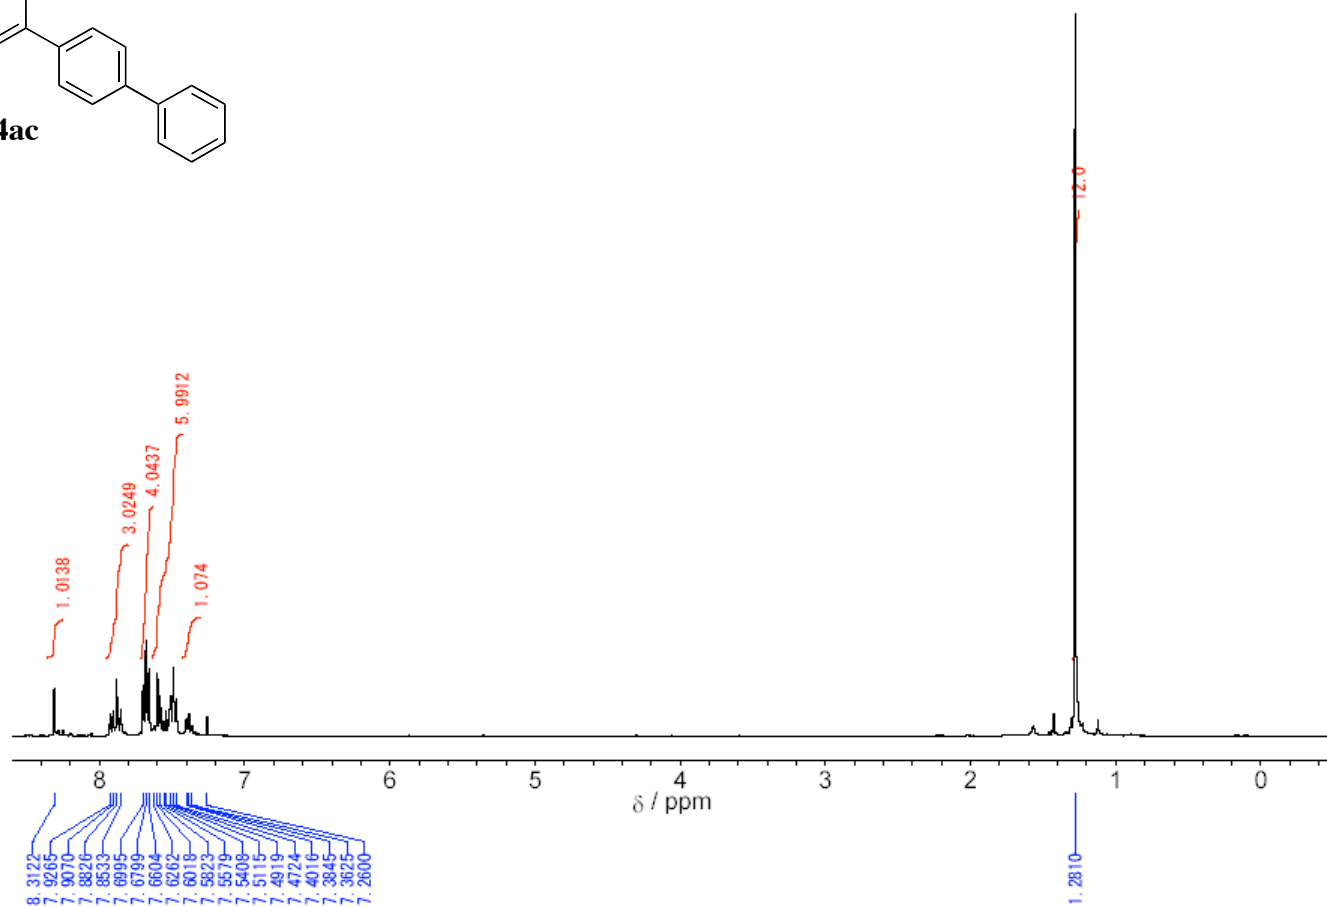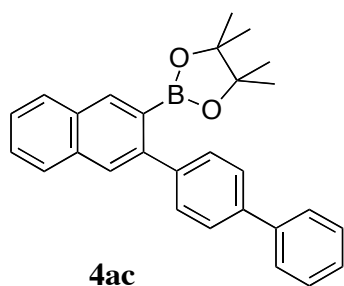

<sup>13</sup>C

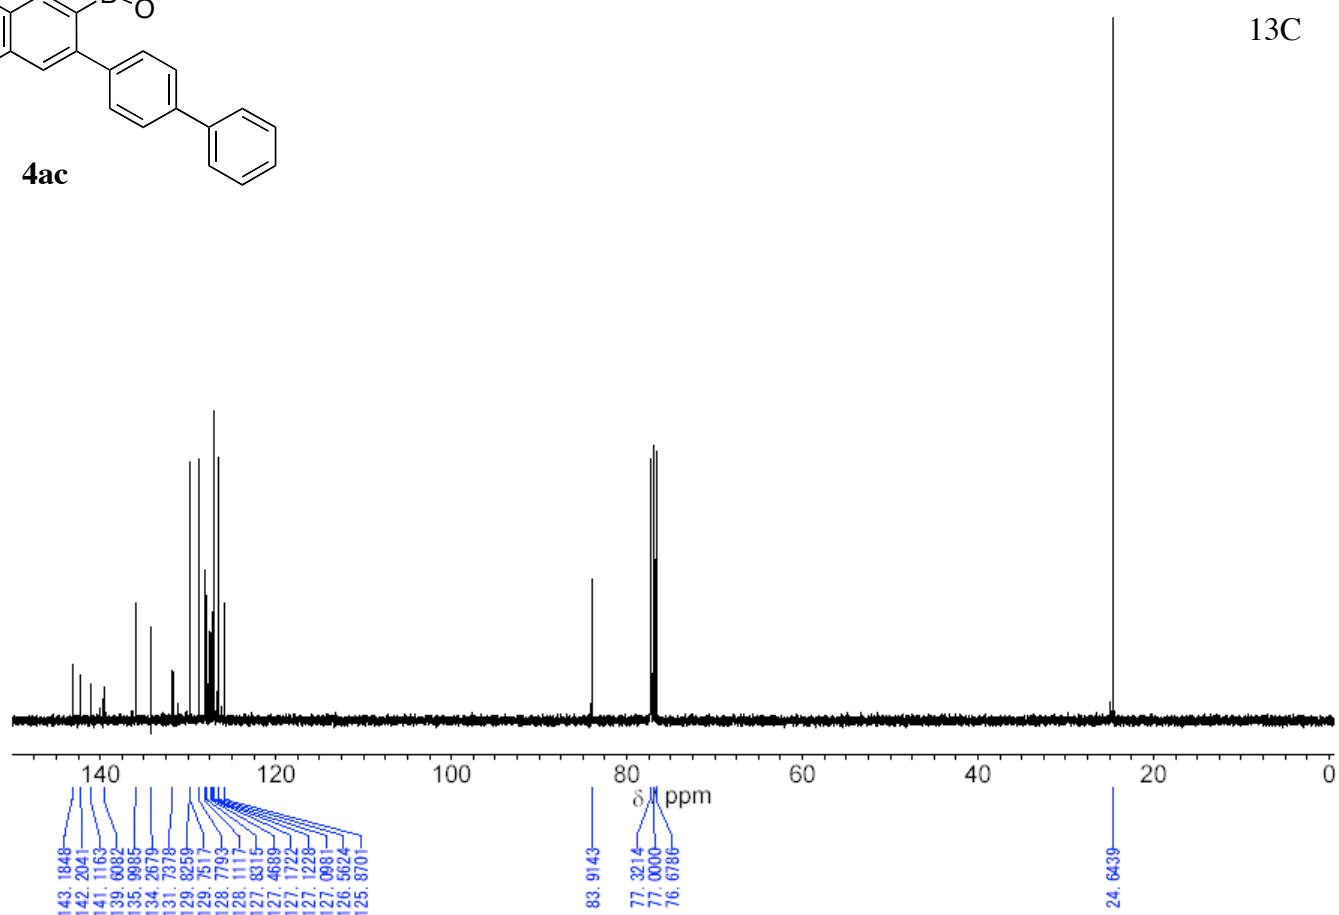

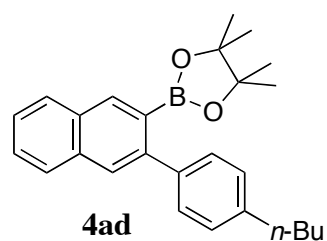

<sup>1</sup>H

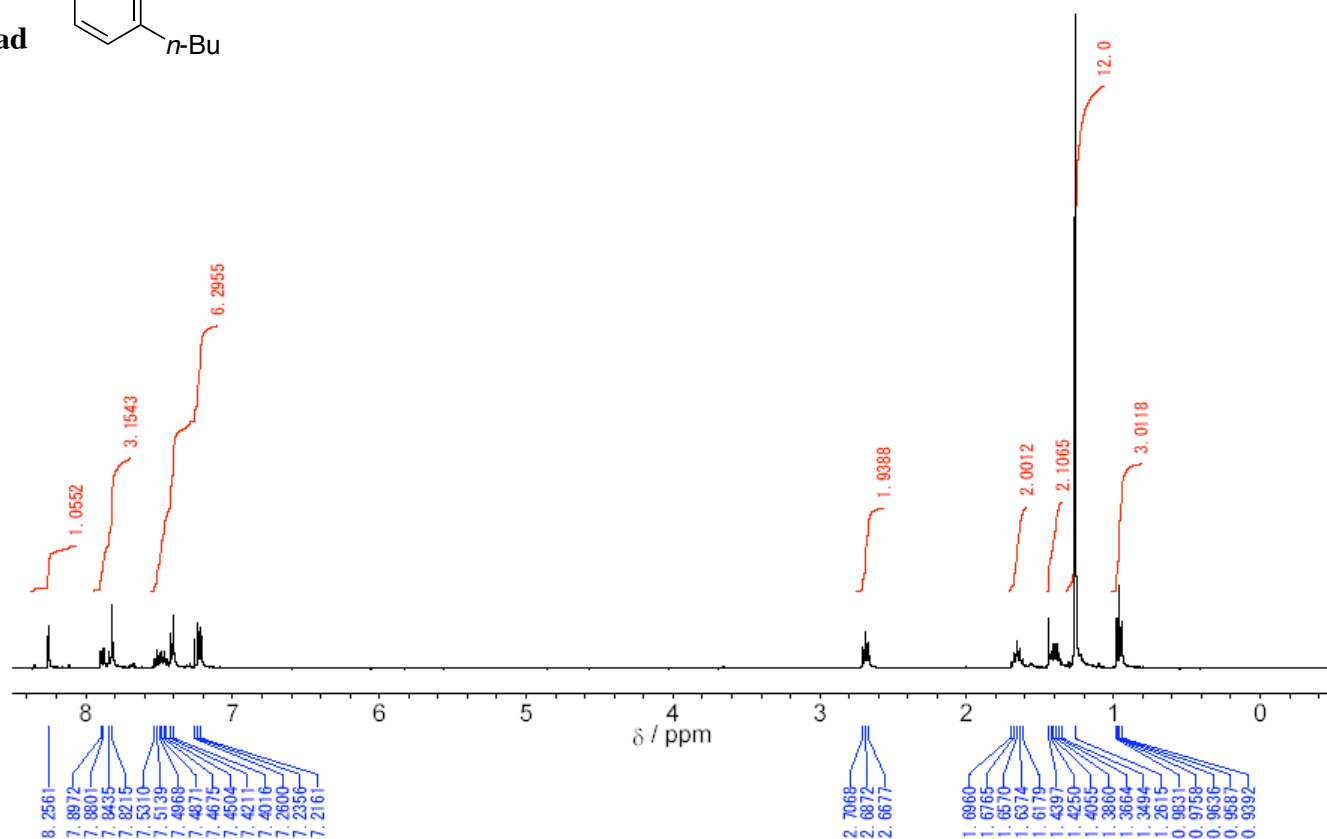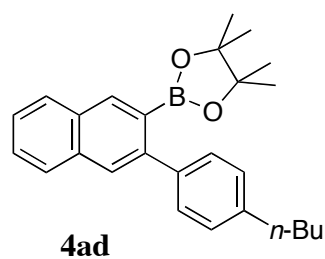

<sup>13</sup>C

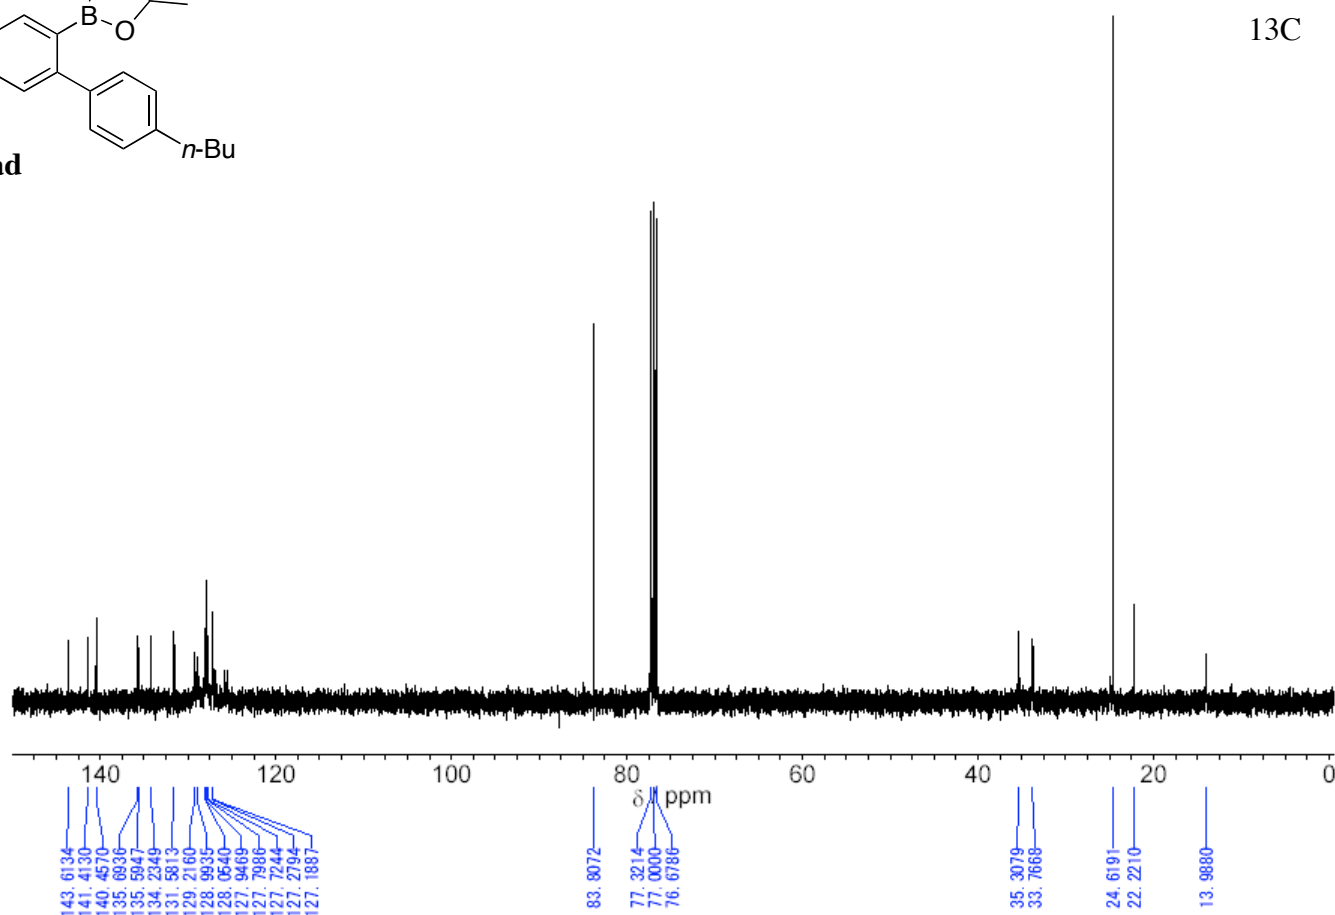

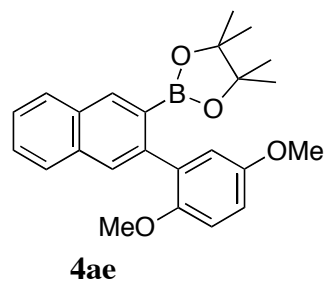

<sup>1</sup>H

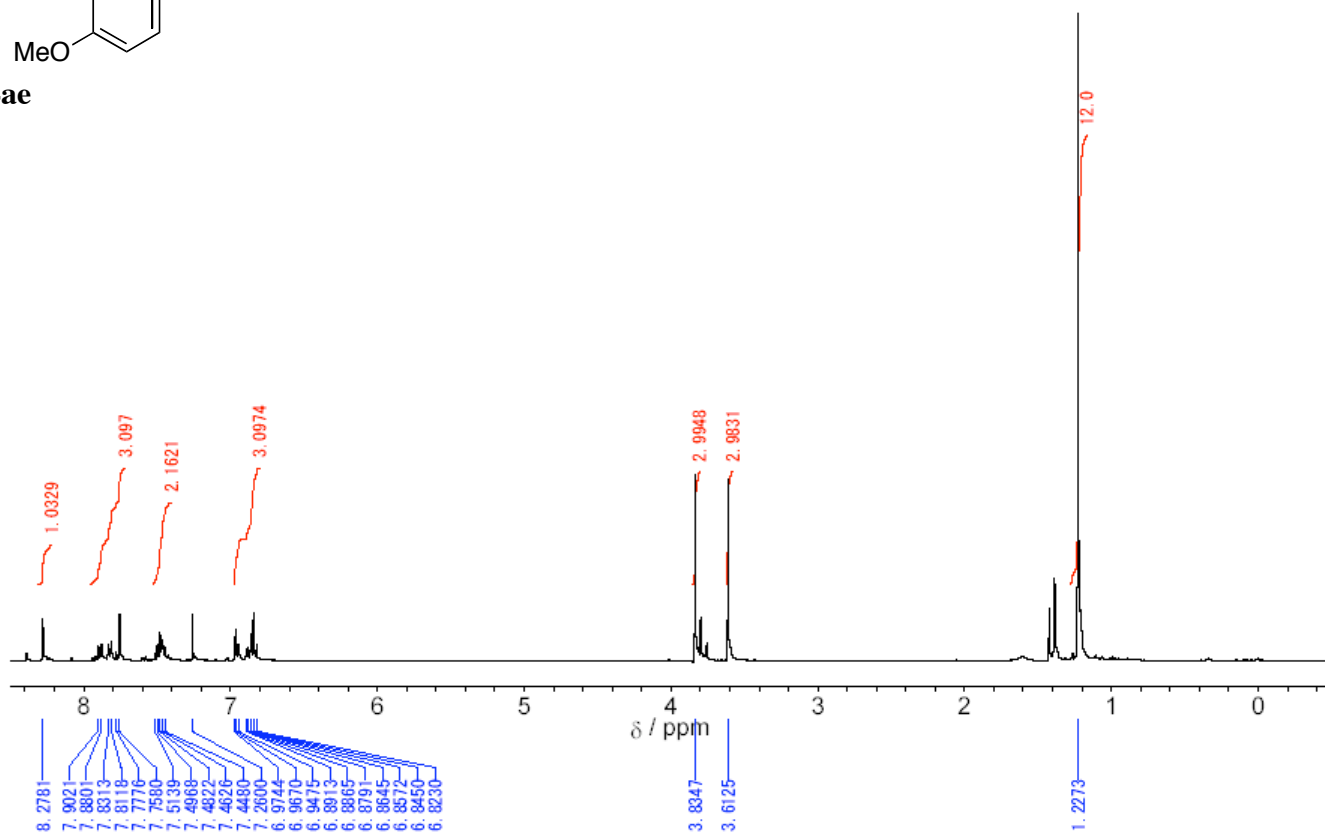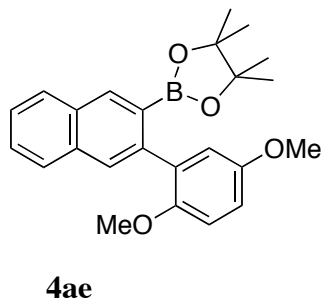

<sup>13</sup>C

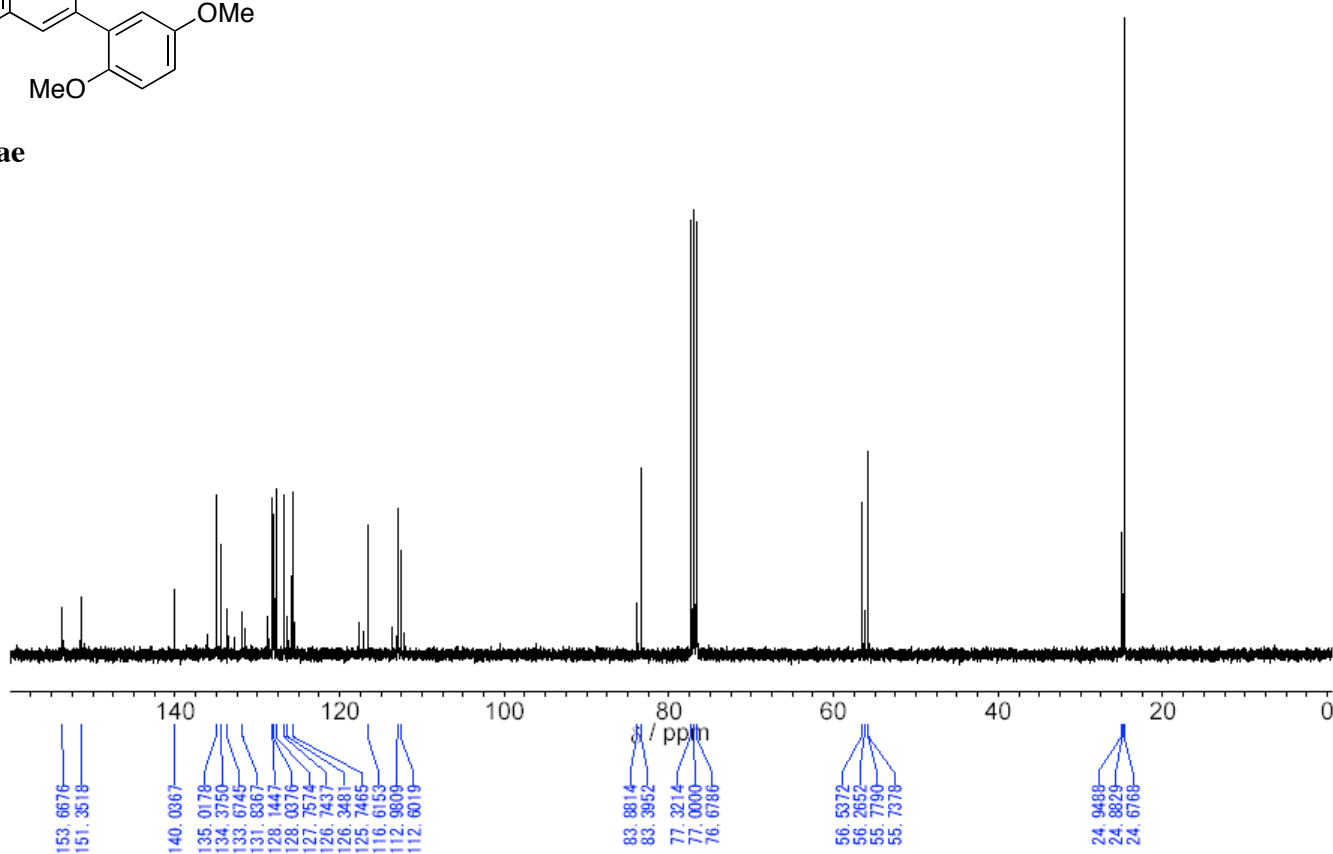



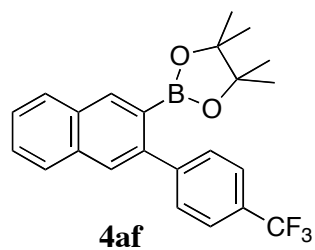

<sup>1</sup>H

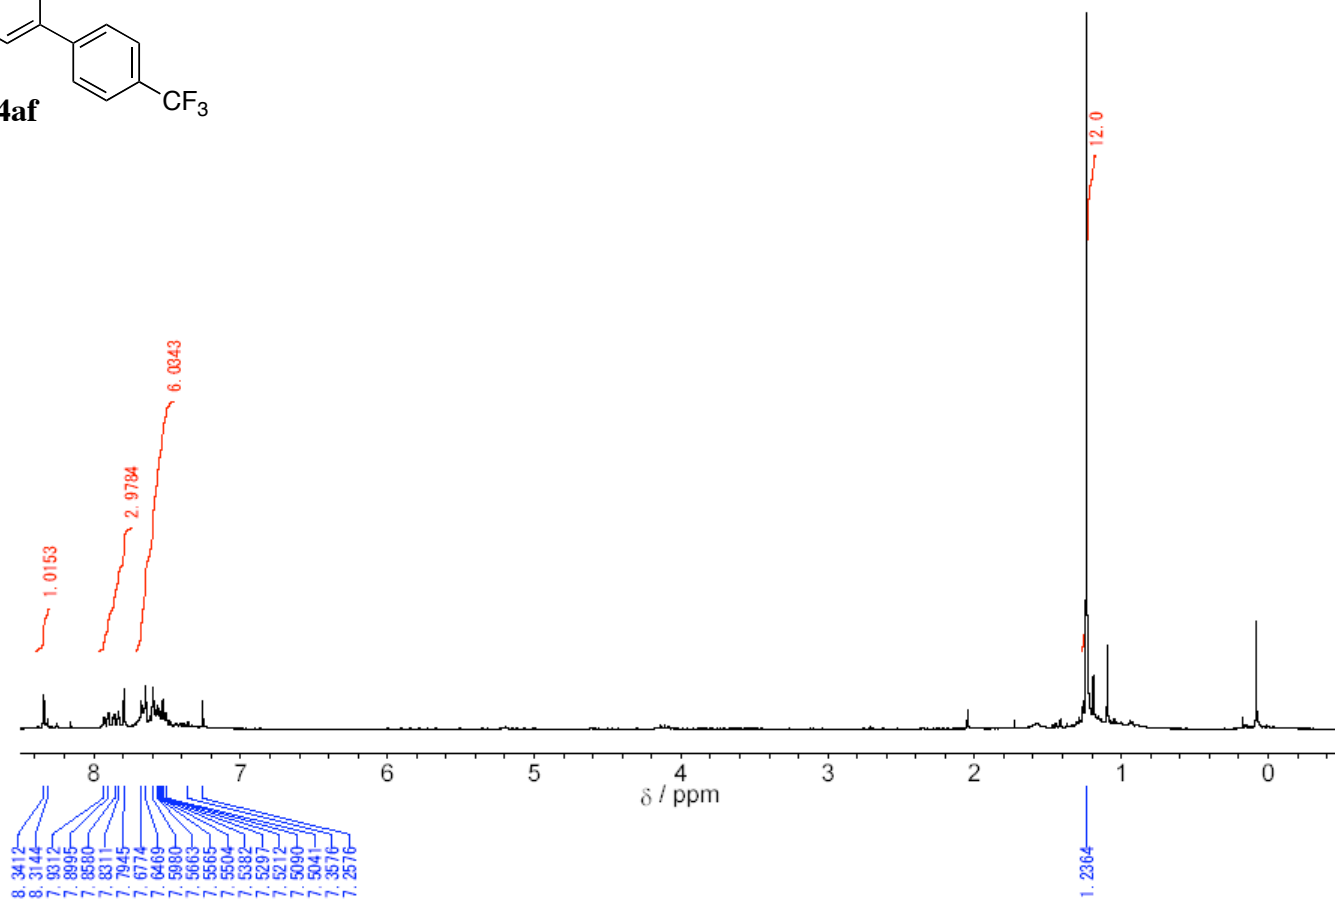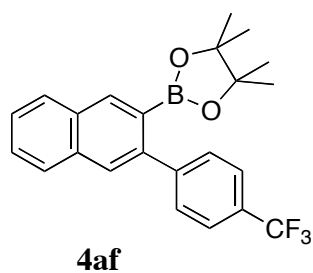

<sup>13</sup>C

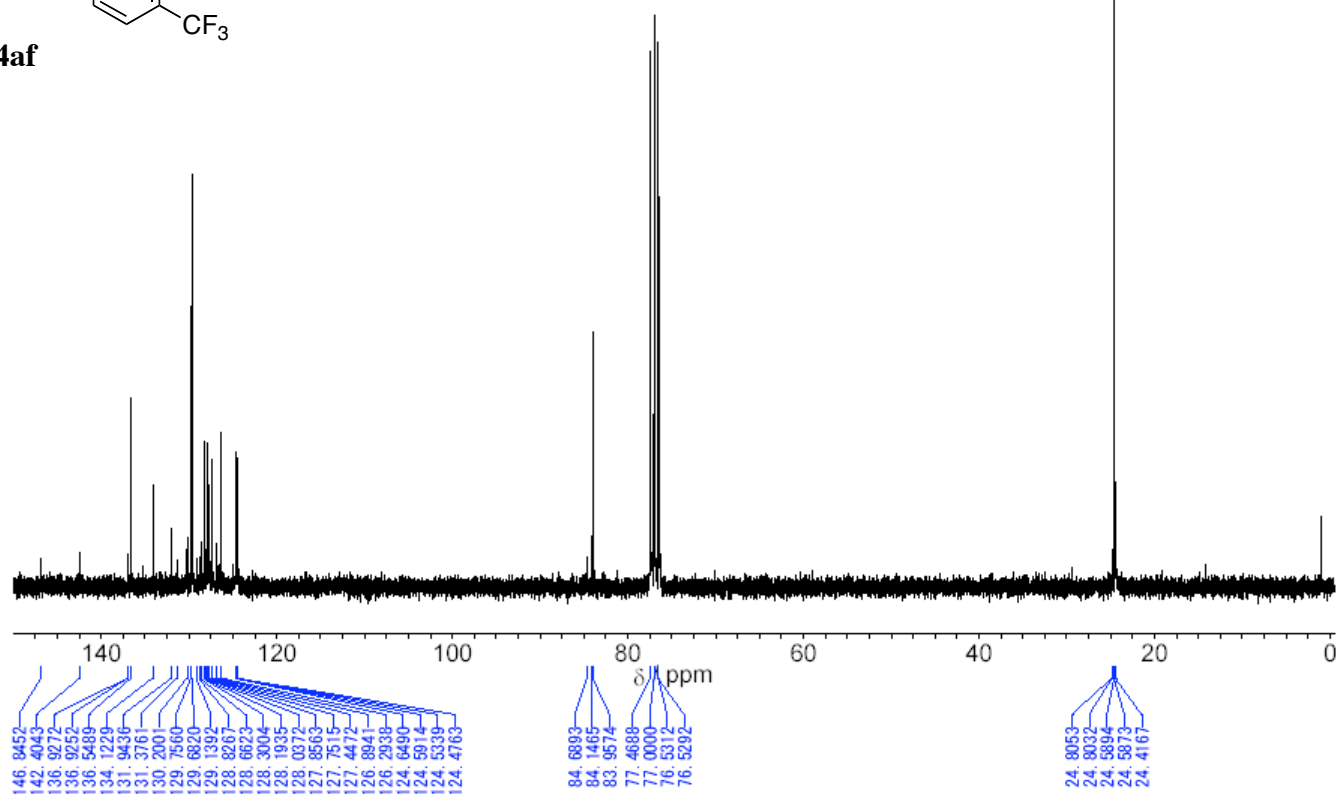

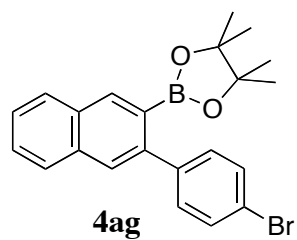

<sup>1</sup>H

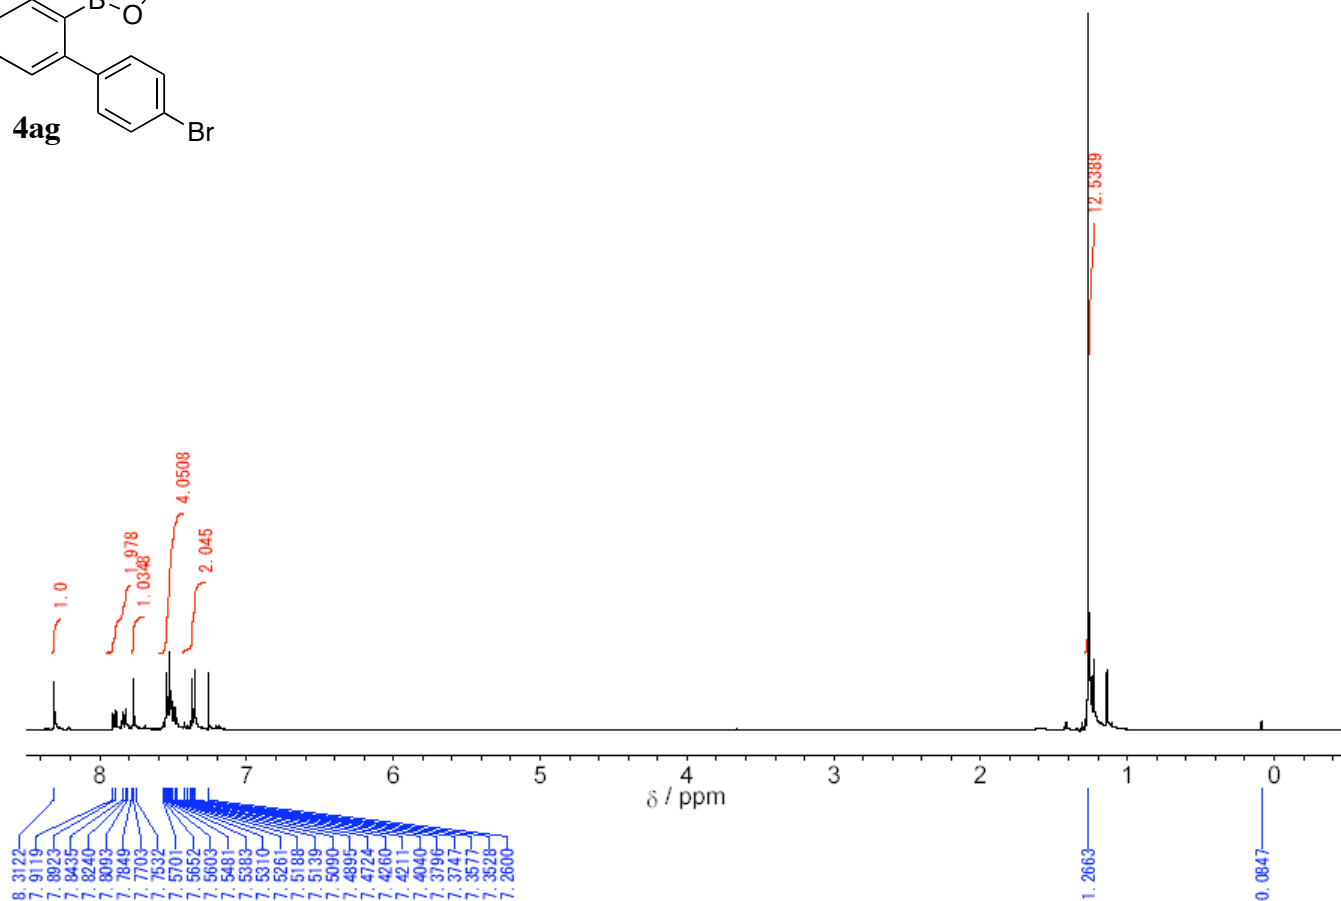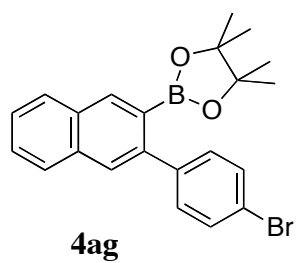

<sup>13</sup>C

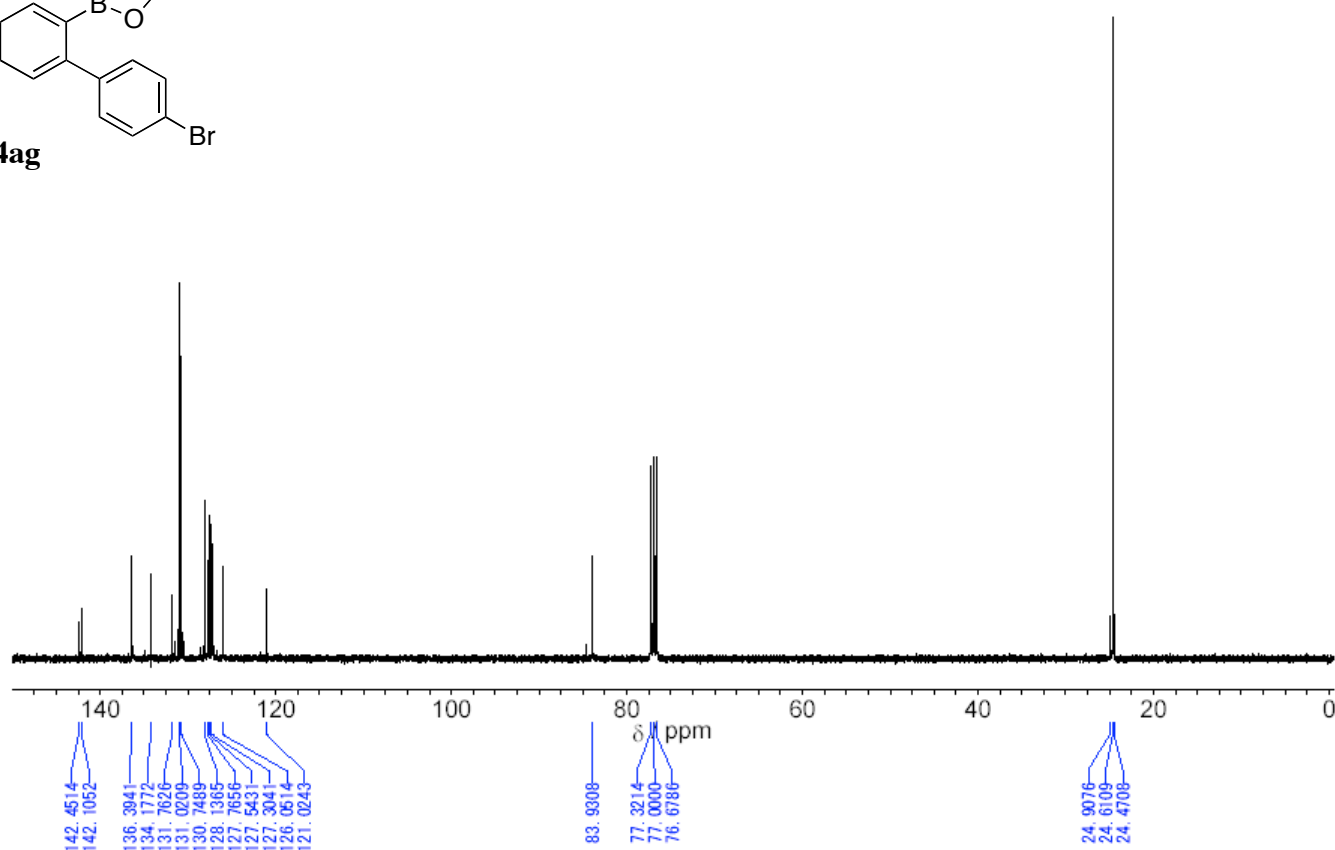

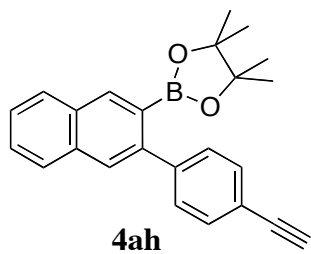

<sup>1</sup>H

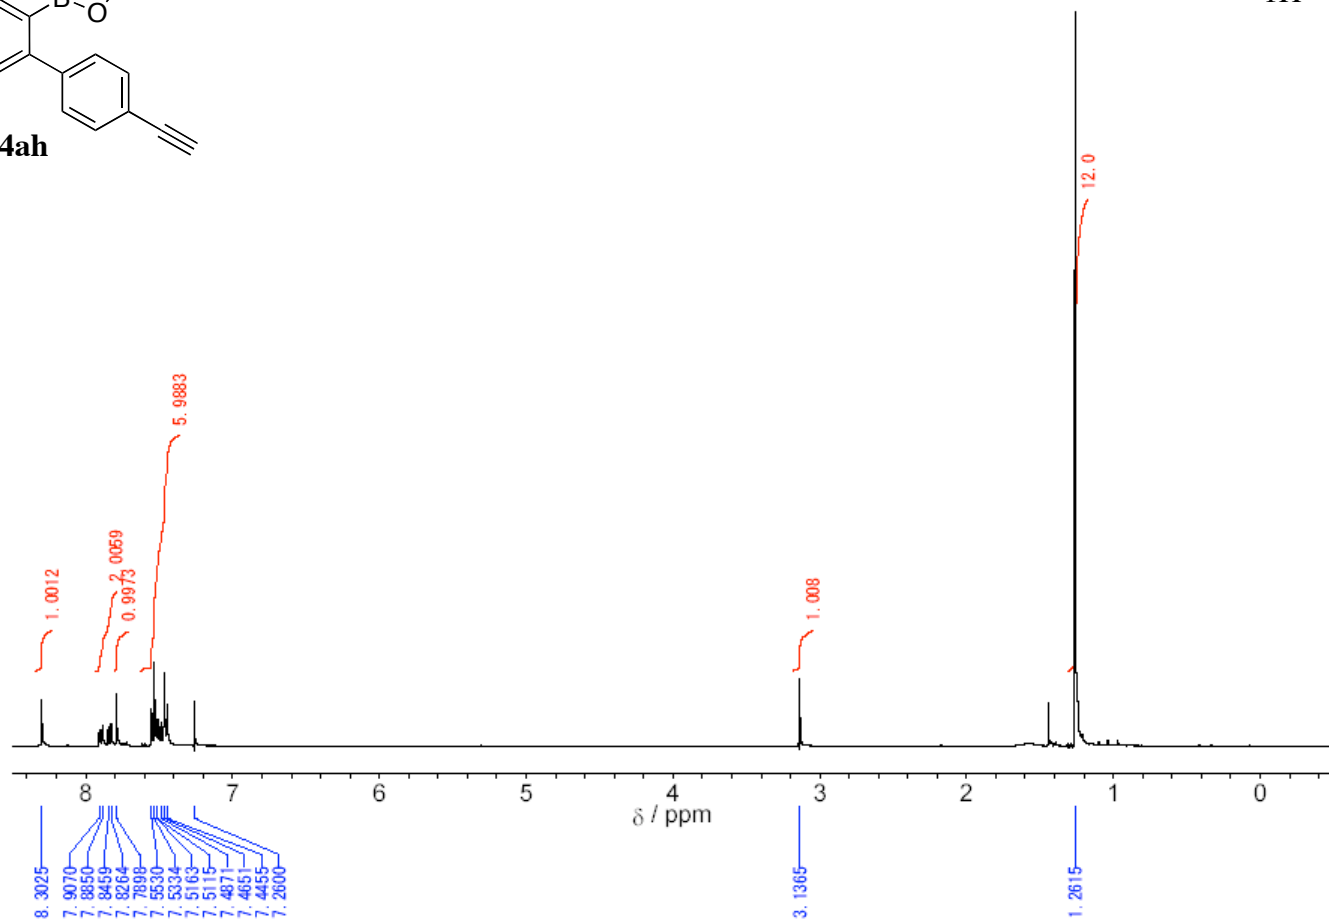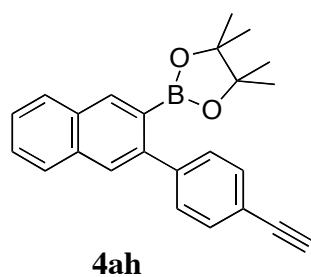

<sup>13</sup>C

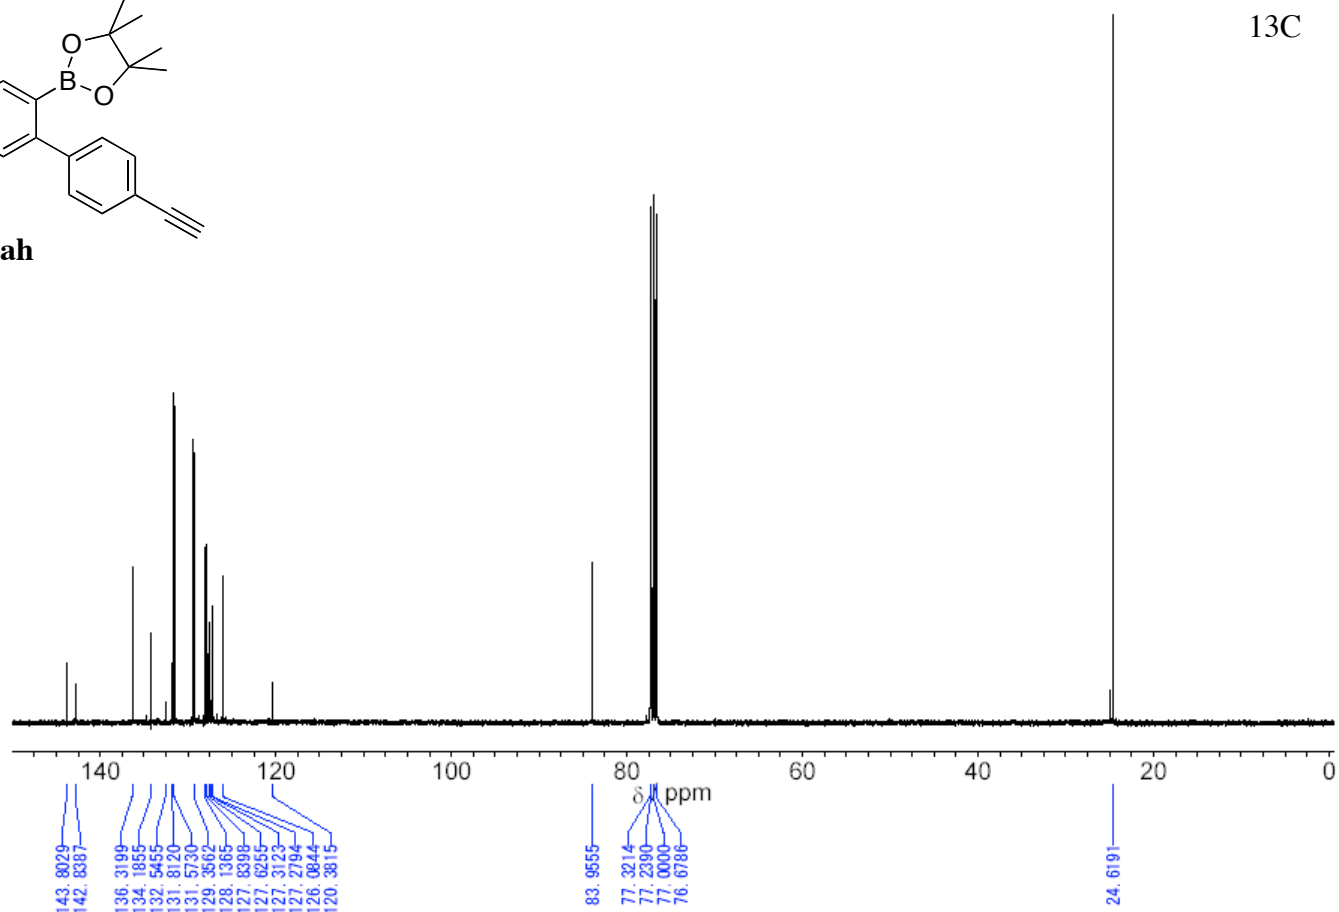

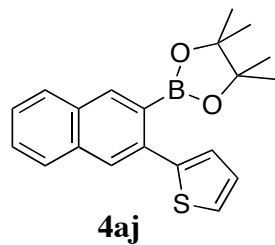

<sup>1</sup>H

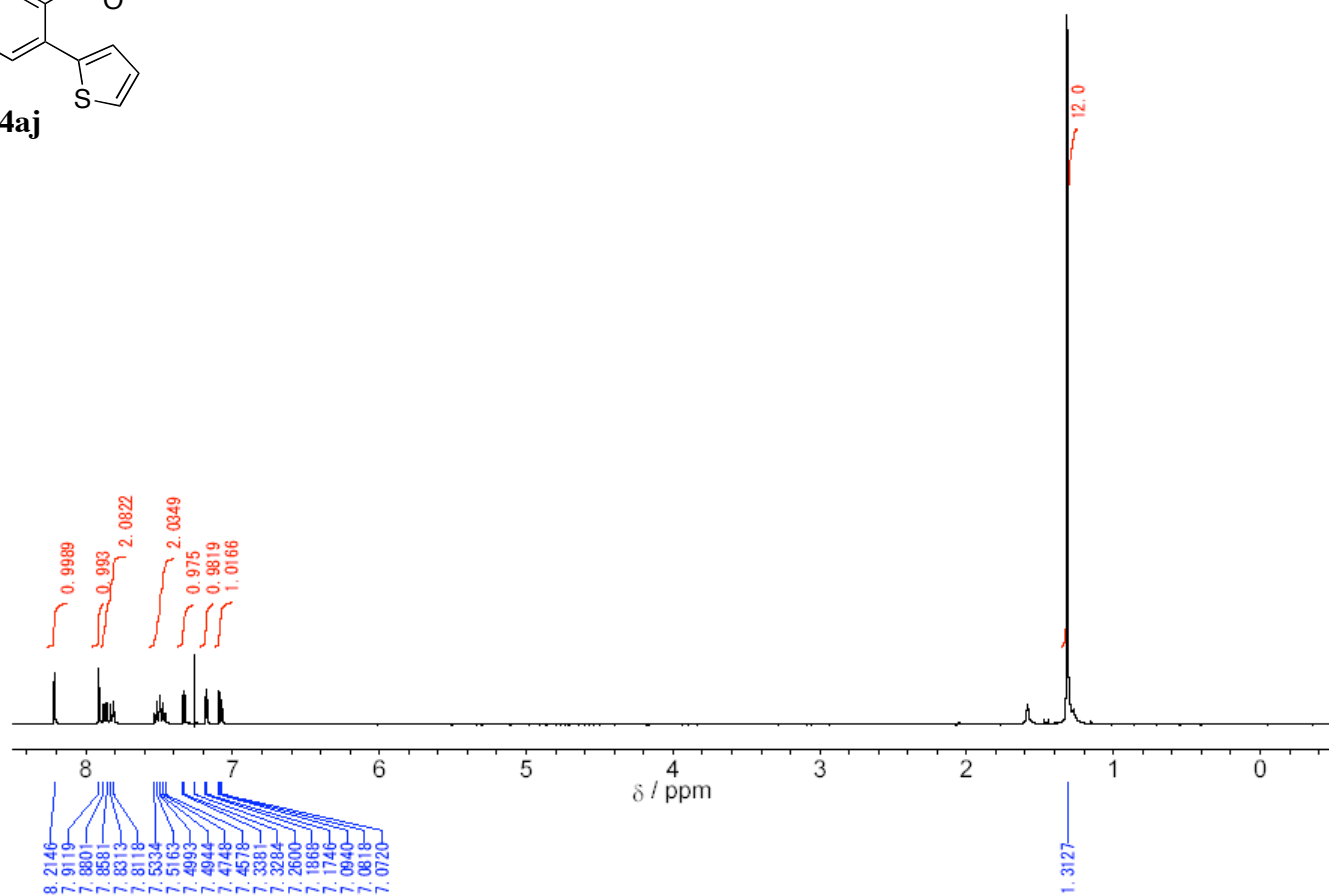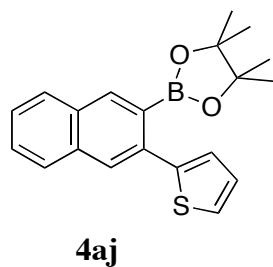

<sup>13</sup>C

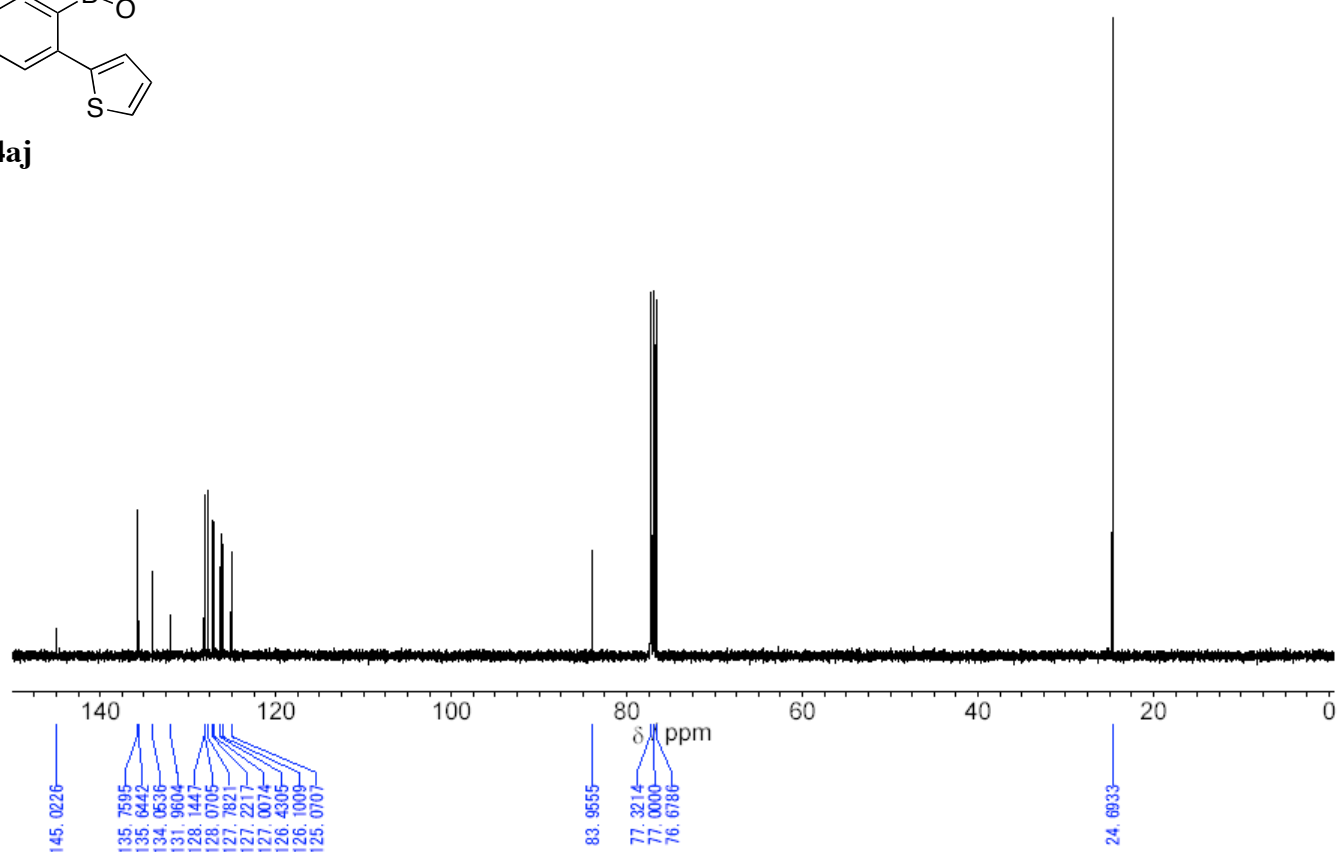

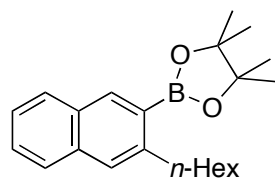

<sup>1</sup>H

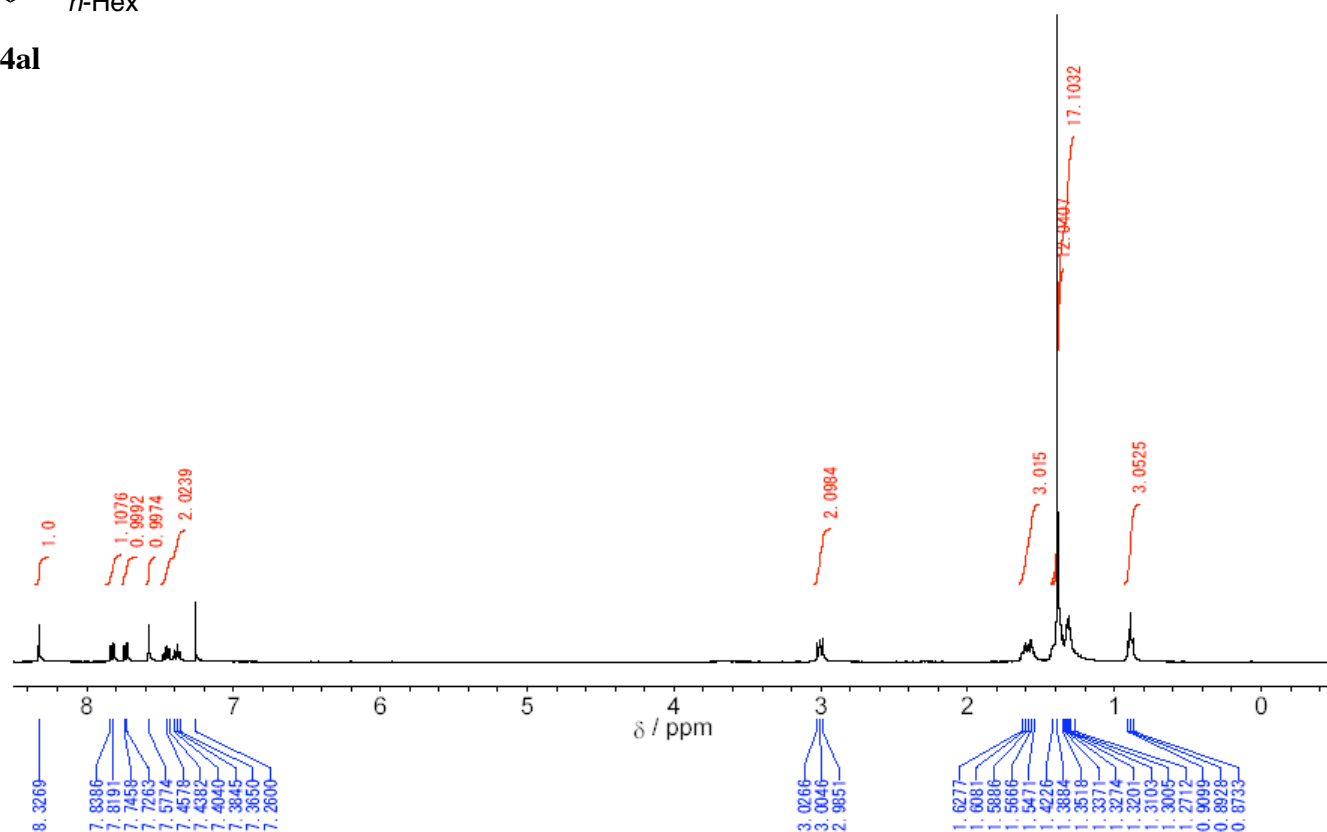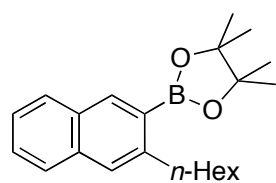

<sup>13</sup>C

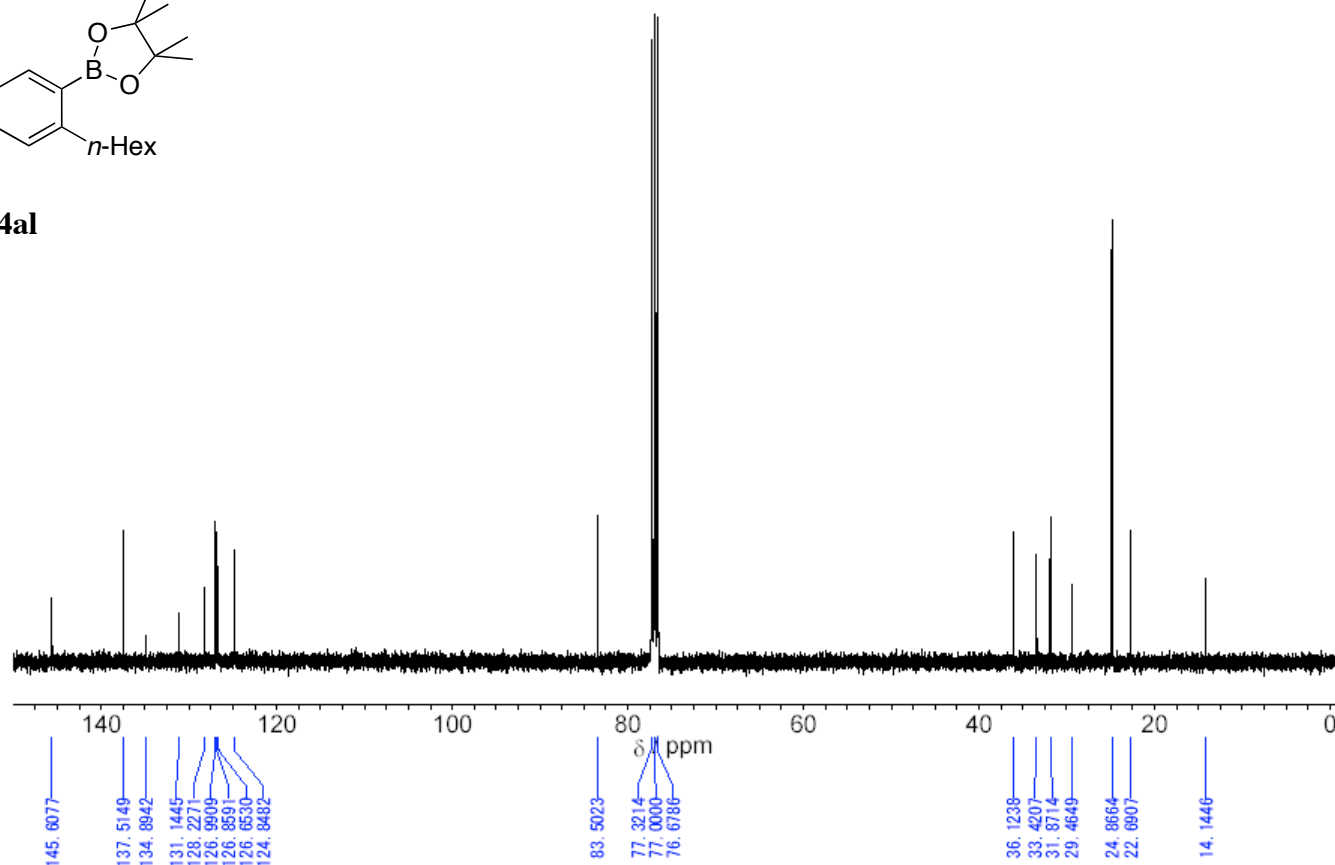

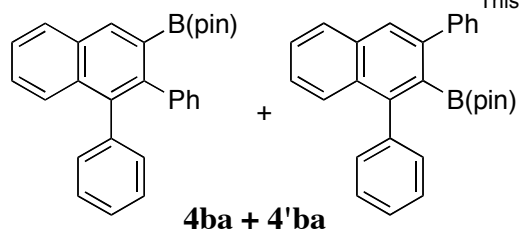

<sup>1</sup>H

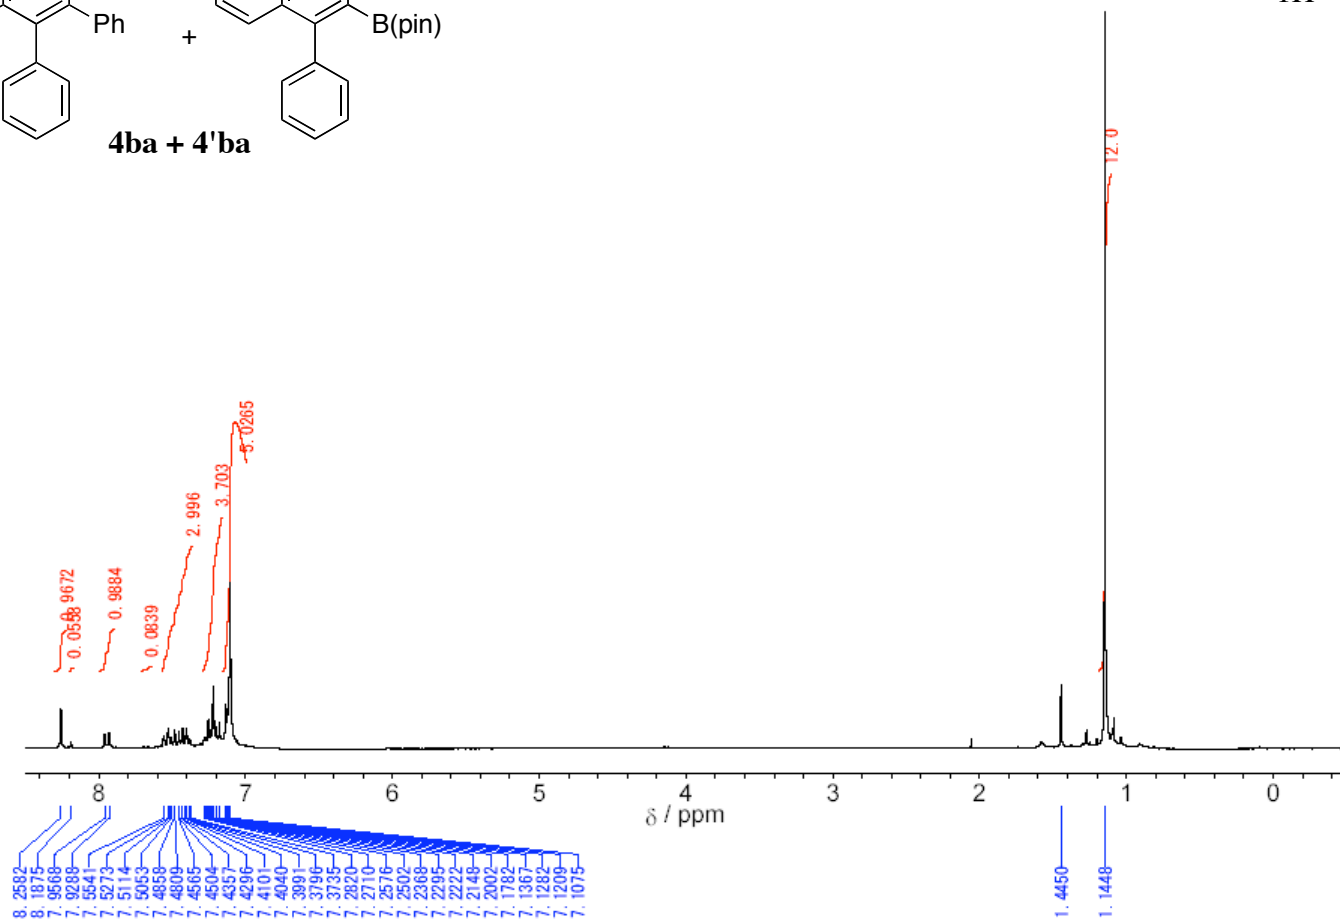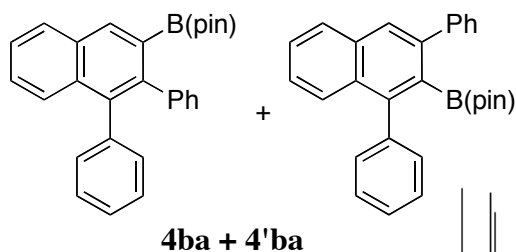

<sup>13</sup>C

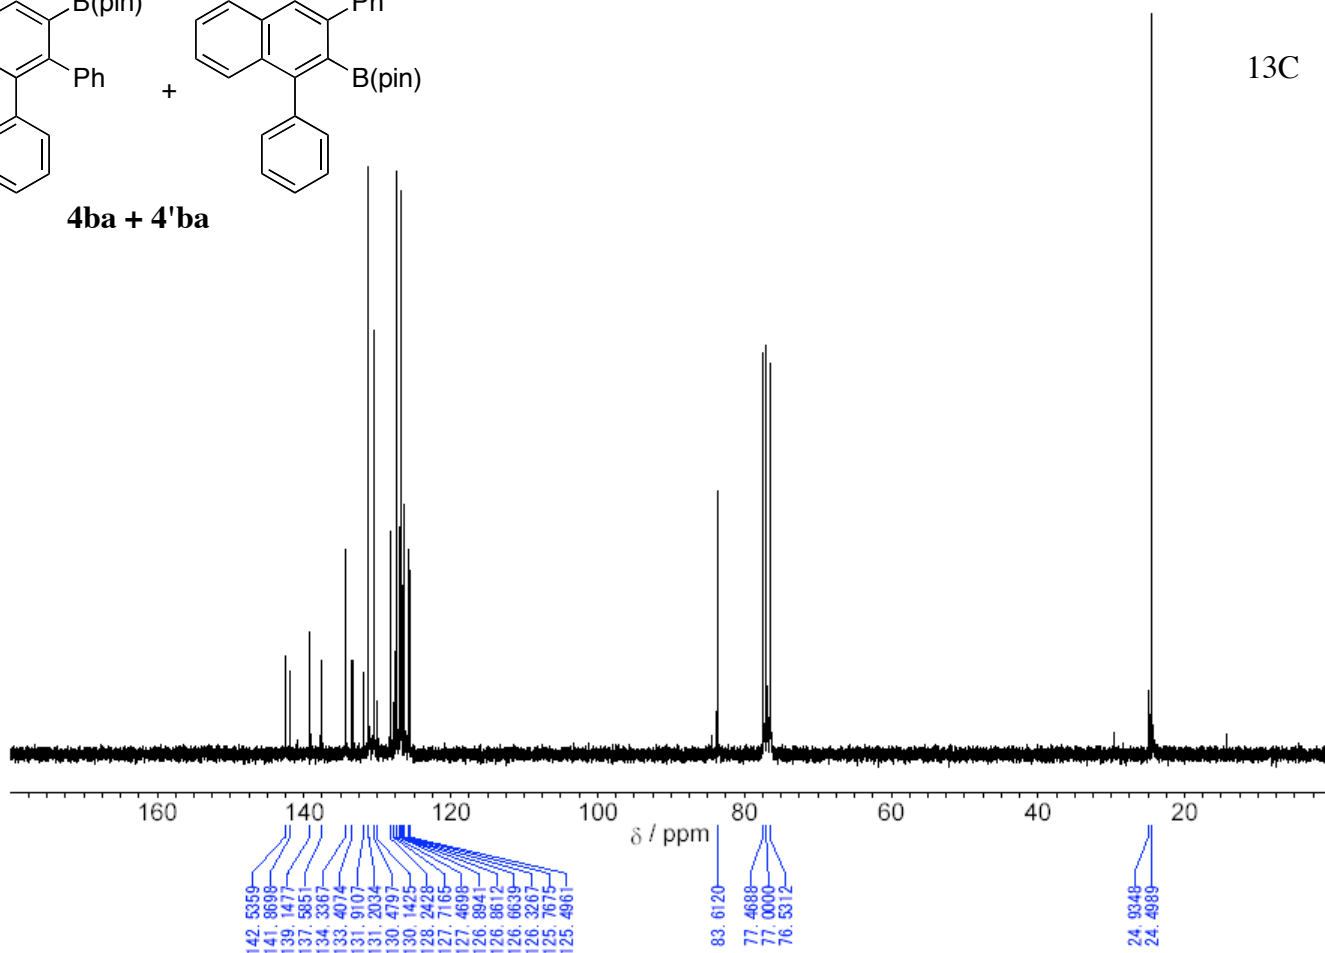

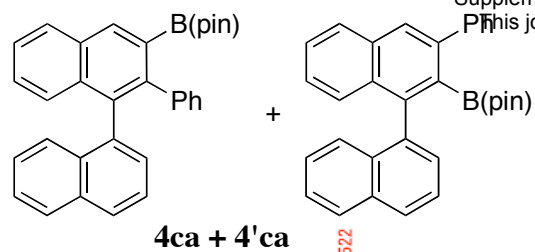

<sup>1</sup>H

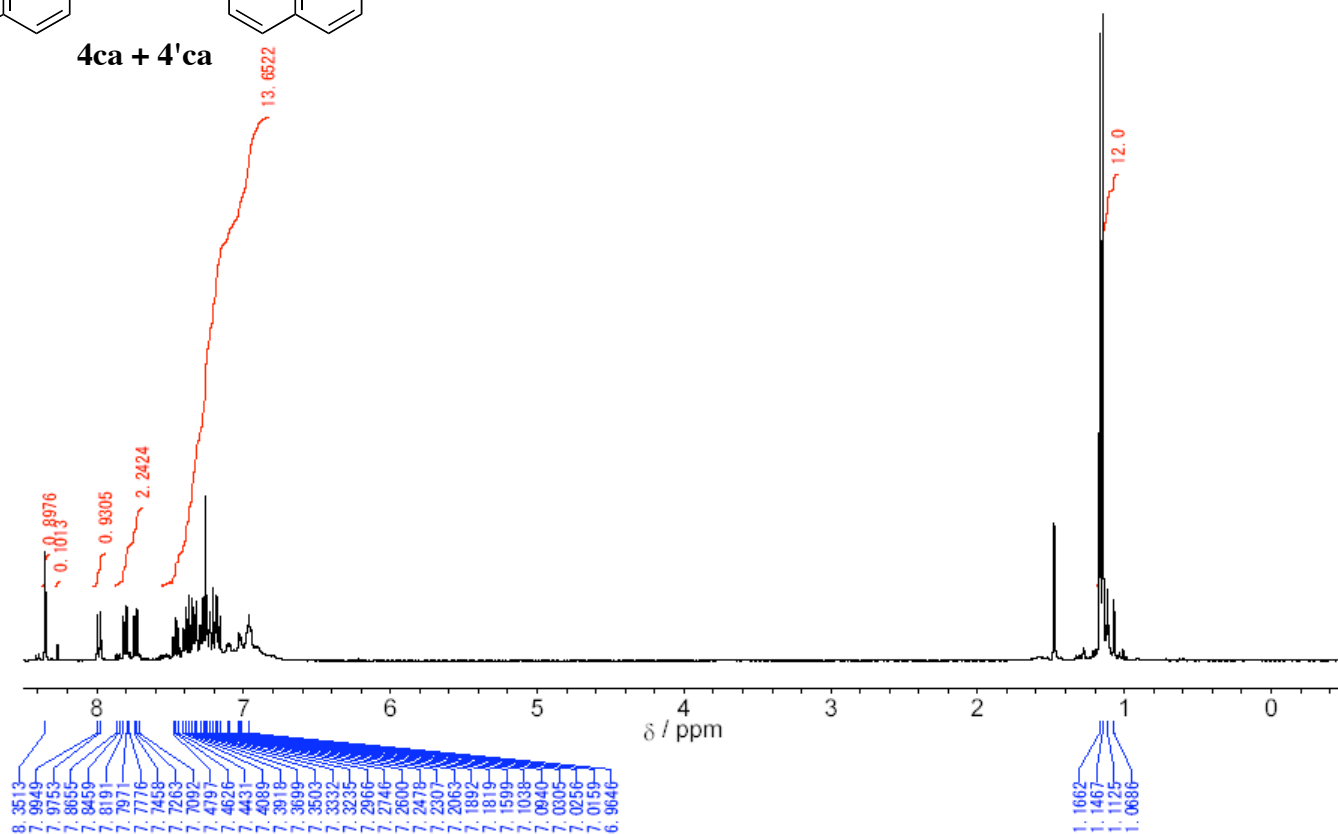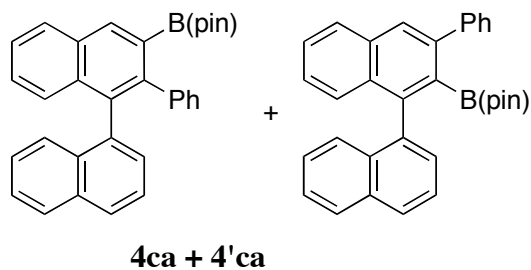

<sup>13</sup>C

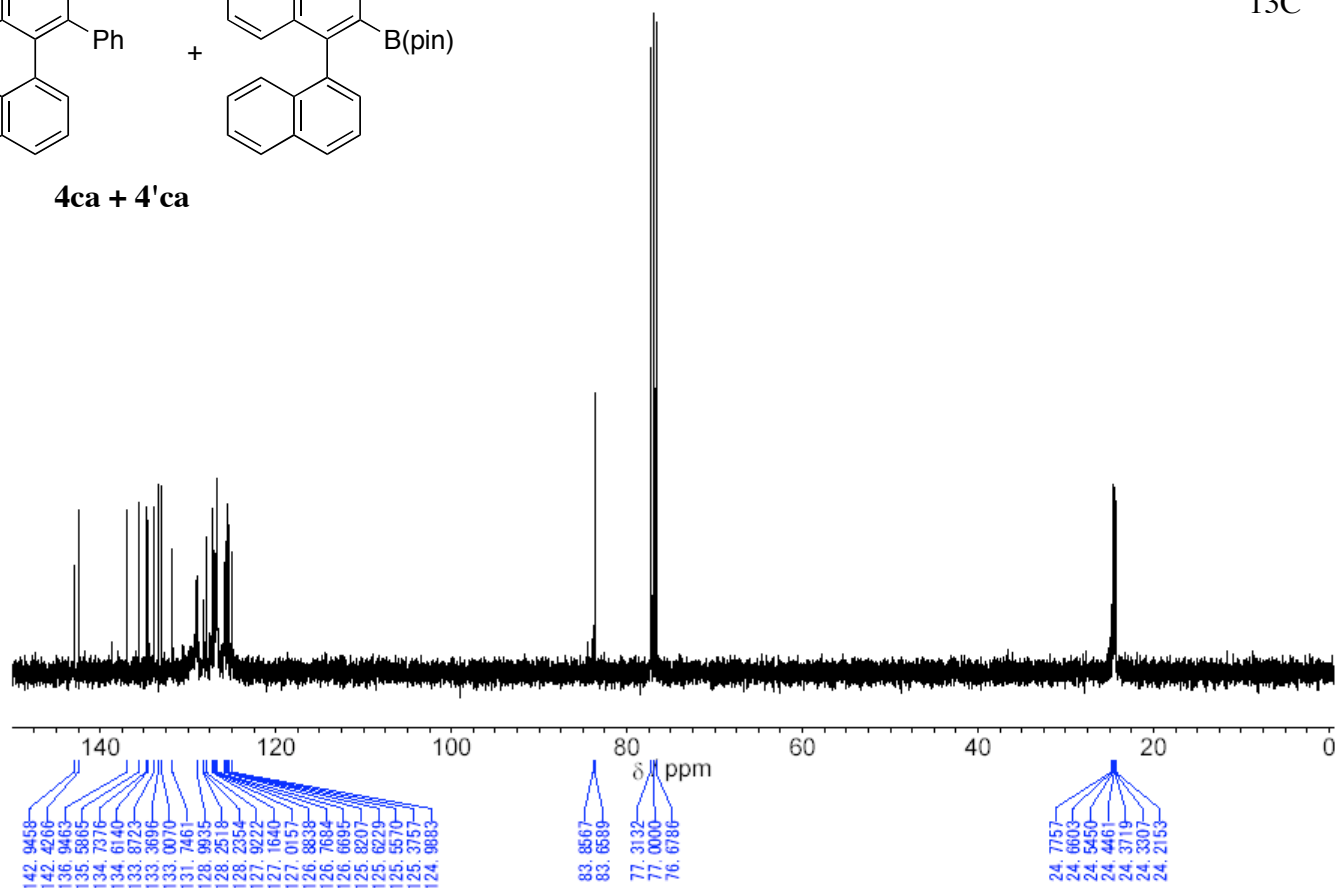

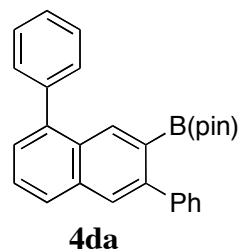

<sup>1</sup>H

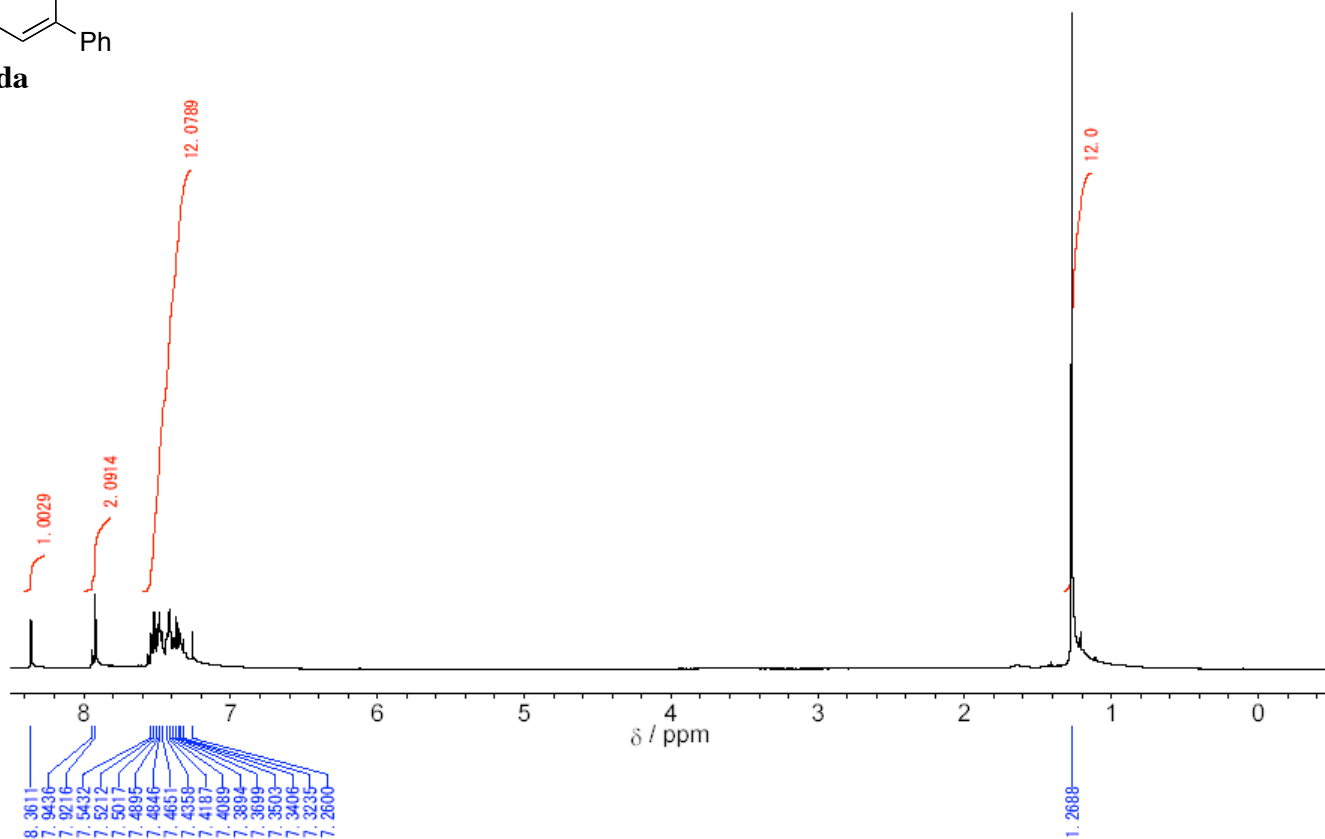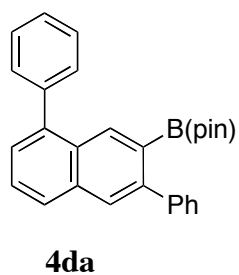

<sup>13</sup>C

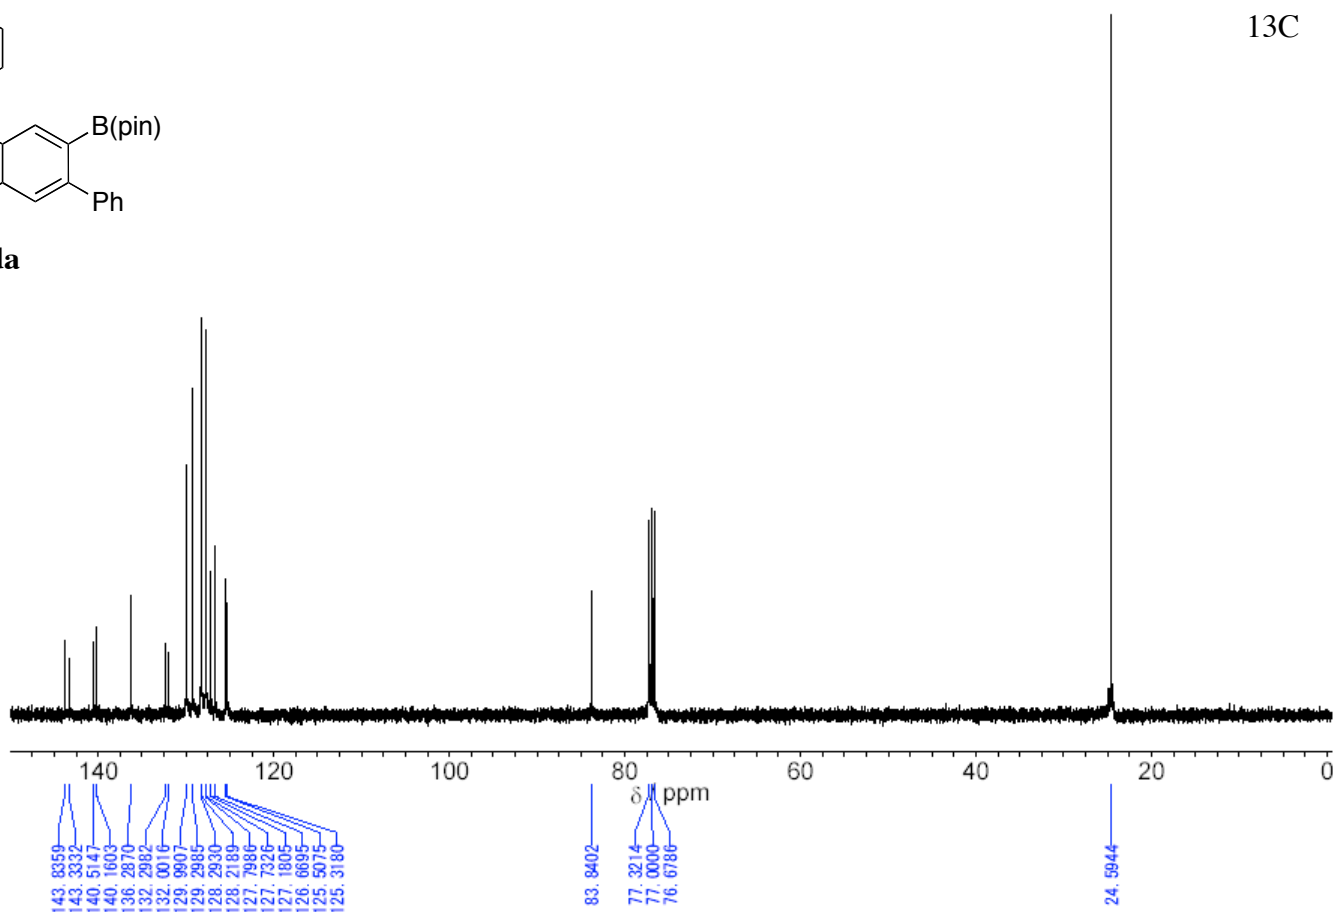



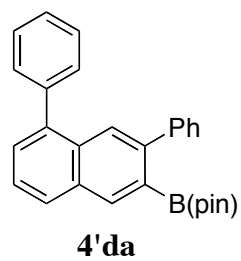

<sup>1</sup>H

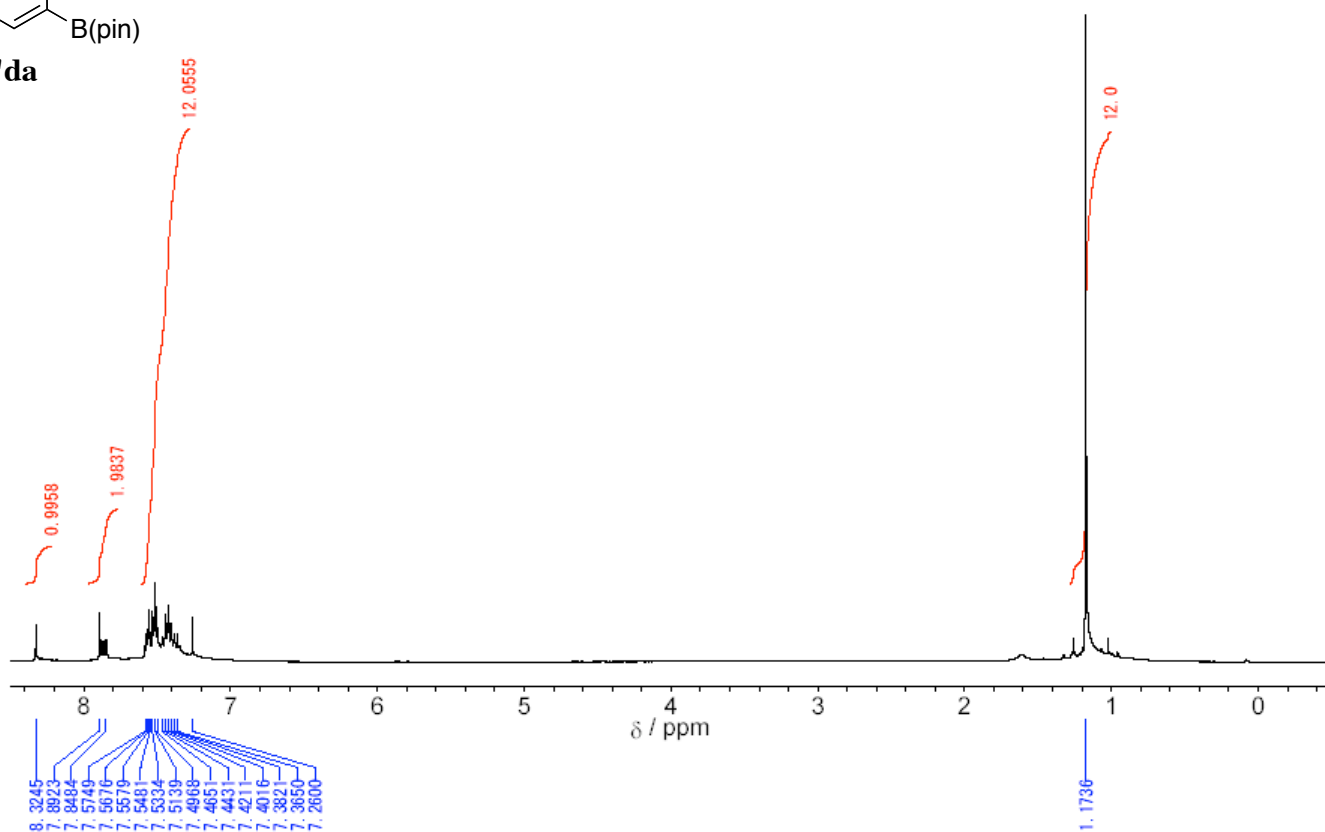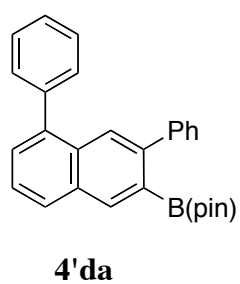

<sup>13</sup>C

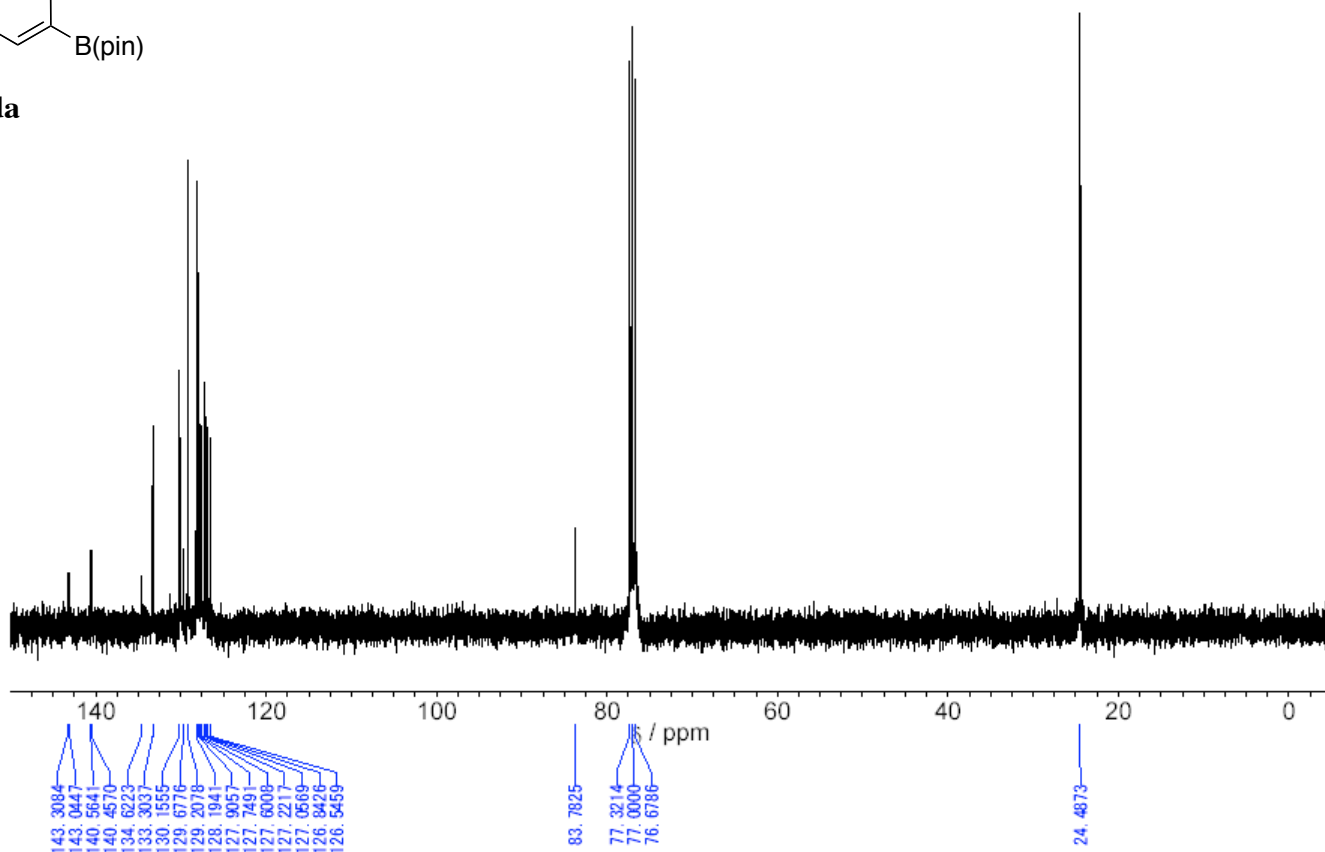

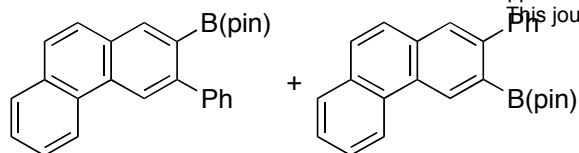

4ea + 4'ea

<sup>1</sup>H

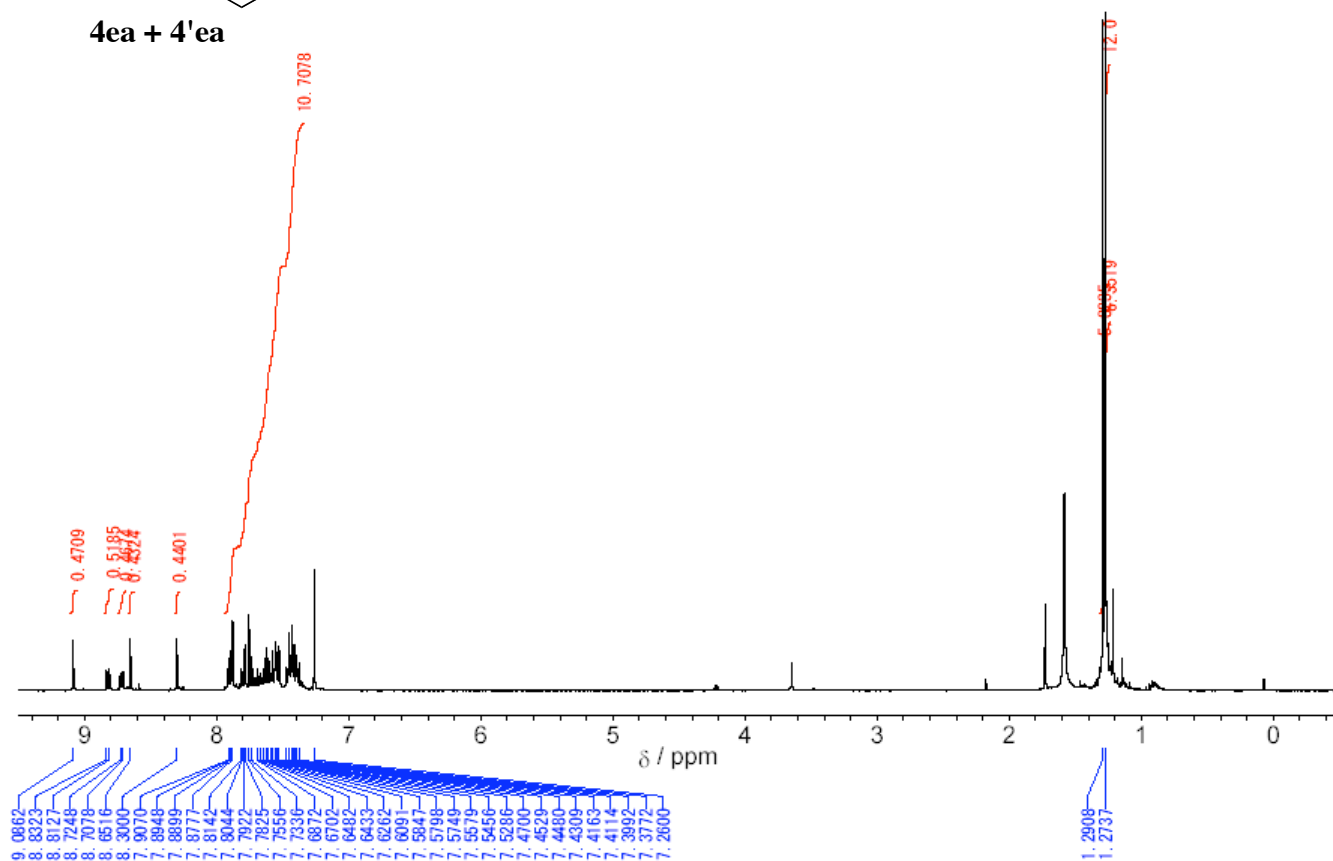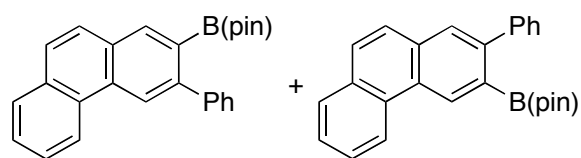

4ea + 4'ea

<sup>13</sup>C

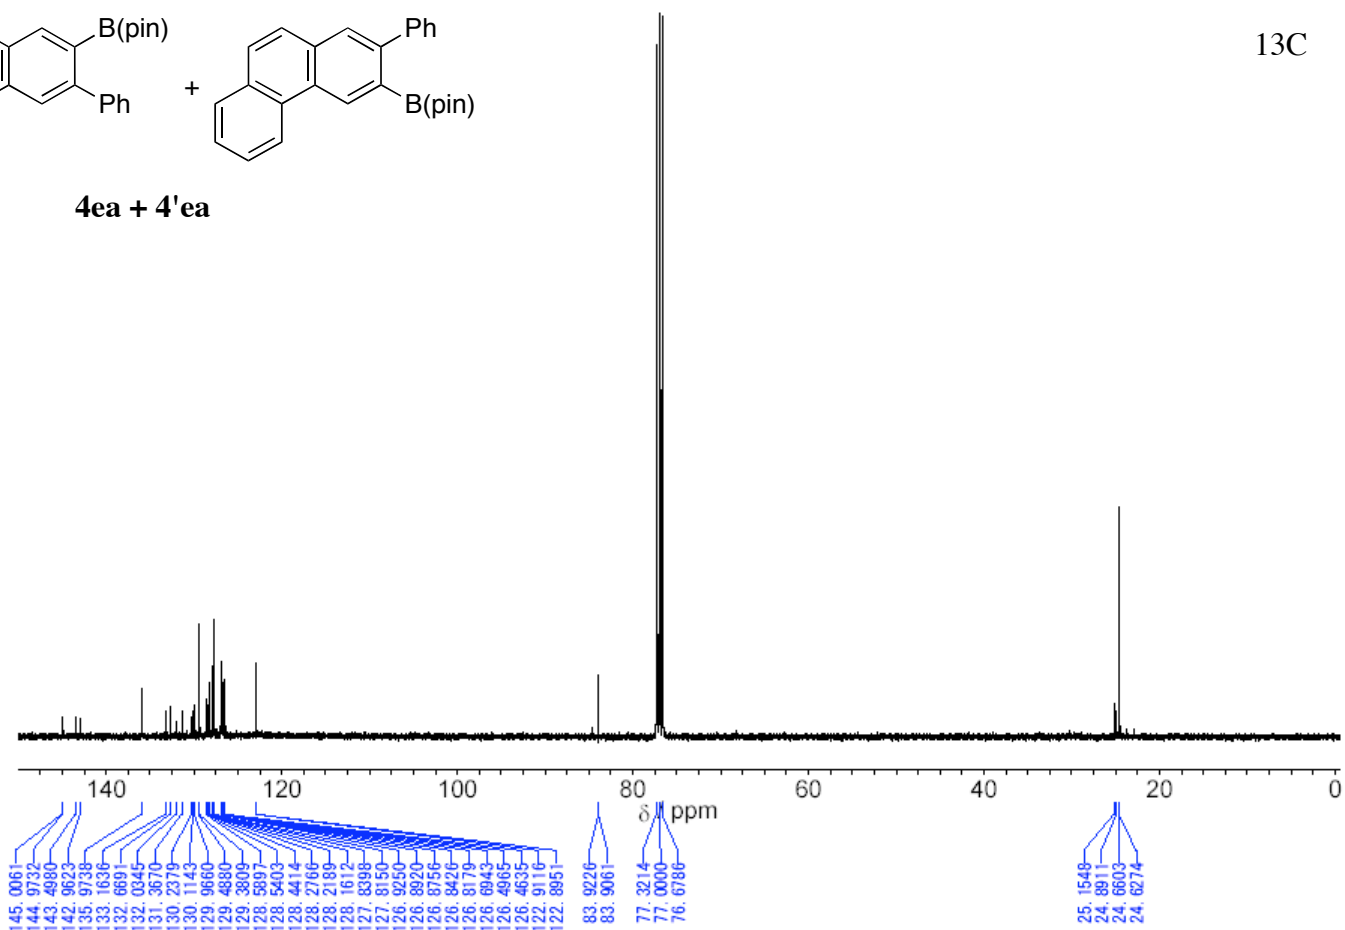

Supplement: c002949a.pdf [file c002949a.pdf]
